# Supplementary material for: Associations of common breast cancer susceptibility alleles with risk of breast cancer subtypes in BRCA1 and BRCA2 mutation carriers
Source: PubMed Central journal article supplement (PMC4406179; doi:10.1186/s13058-014-0492-9), 2014-12-31

## **Additional file 1**

**contains supplementary material for**

### **Associations of common breast cancer susceptibility alleles with risk of breast cancer subtypes in *BRCA1* and *BRCA2* mutation carriers**

Karoline B Kuchenbaecker, Susan L Neuhausen, Mark Robson, Daniel Barrowdale, Lesley McGuffog, Anna Marie Mulligan, Irene L Andrulis, Amanda B Spurdle, Marjanka K Schmidt, Rita Katharina Schmutzler, Christoph Engel, Barbara Wappenschmidt, Heli Nevanlinna, Mads Thomassen, Melissa Southey, Paolo Radice, Susan J Ramus, Susan M Domchek, Katherine L Nathanson, Andrew Lee, Sue Healey, Robert L Nussbaum, Timothy R Rebbeck, Banu K Arun, Paul James, Beth Y Karlan, Jenny Lester, Ilana Cass, Breast Cancer Family Registry, Mary Beth Terry, Mary B Daly, David E Goldgar, Sandra S Buys, Ramunas Janavicius, Laima Tihomirova, Nadine Tung, Cecilia M Dorfling, Elizabeth J van Rensburg, Linda Steele, Thomas v O Hansen, Bent Ejlersen, Anne-Marie Gerdes, Finn C Nielsen, Joe Dennis, Julie Cunningham, Steven Hart, Susan Slager, Ana Osorio, Javier Benitez, Mercedes Duran, Jeffrey N Weitzel, Isaac Tafur, Mary Hander, Paolo Peterlongo, Siranoush Manoukian, Bernard Peissel, Gaia Roversi, Giulietta Scuvera, Bernardo Bonanni, Paolo Mariani, Sara Volorio, Riccardo Dolcetti, Liliana Varesco, Laura Papi, Maria Grazia Tibiletti, Giuseppe Giannini, Florentia Fostira, Irene Konstantopoulou, Judy Garber, Ute Hamann, Alan Donaldson, Carole Brewer, Claire Foo, D Gareth Evans, Debra Frost, Diana Eccles, EMBRACE, Fiona Douglas, Angela Brady, Jackie Cook, Marc Tischkowitz, Julian Adlard, Julian Barwell, Kai-ren Ong, Lisa Walker, Louise Izatt, Lucy E Side, M John Kennedy, Mark T Rogers, Mary E Porteous, Patrick J Morrison, Radka Platte, Ros Eeles, Rosemarie Davidson, Shirley Hodgson, Steve Ellis, Andrew K Godwin, Kerstin Rhiem, Alfons Meindl, Nina Ditsch, Norbert Arnold, Hansjoerg Plendl, Dieter Niederacher, Christian Sutter, Doris Steinemann, Nadja Bogdanova-Markov, Karin Kast, Raymonda Varon-Mateeva, Shan Wang-Gohrke, Andrea Gehrig, Birgid Markiefka, Bruno Buecher, Cédric Lefol, Dominique Stoppa-Lyonnet, Etienne Rouleau, Fabienne Prieur, Francesca Damiola, GEMO Study Collaborators, Laure Barjhoux, Laurence Faivre, Michel Longy, Nicolas Sevenet, Olga M Sinilnikova, Sylvie Mazoyer, Valérie Bonadona, Virginie Caux-Moncoutier, Claudine Isaacs, Tom Van Maerken, Kathleen Claes, Marion Piedmonte, Lesley Andrews, John Hays, Gustavo C Rodriguez, Trinidad Caldes, Miguel de la Hoya, Sofia Khan, Agnes Jager, Annemarie H van der Hout, Ans MW van den Ouweland, Antoinette Hollestelle, Frans BL Hogervorst, Cora M Aalfs, JL de Lange, Hanne EJ Meijers-Heijboer, Annemarie H van der Hout, Juul T Wijnen, KEP van Roozendaal, Arjen R Mensenkamp, Ans MW van den Ouweland, Carolien HM van Deurzen, Rob B van der Luijt, HEBON, Edith Olah, Orland Diez, Conxi Lazaro, Ignacio Blanco, Alex Teulé, Mireia Menendez, Anna Jakubowska, Jan Lubinski, Cezary Cybulski, Jacek Gronwald, Katarzyna Jaworska-Bieniek, Katarzyna Durda, Adalgeir Arason, Christine Maugard, Penny Soucy, Marco Montagna, Simona Agata, Manuel R Teixeira, KConFab Investigators, Curtis Olswold, Noralane Lindor, Vernon S Pankratz, Emily Hallberg, Xianshu Wang, Csilla I Szabo, Joseph Vijai, Lauren Jacobs, Marina Corines, Anne Lincoln, Andreas Berger, Anneliese Fink-Retter, Christian F Singer, Christine Rappaport, Daphne Geschwantler Kaulich, Georg Pfeiler, Muy-Kheng Tea, Catherine M Phelan, Phuong L Mai, Mark H Greene, Gad Rennert, Evgeny N Imyanitov, Gord Glendon, Amanda Ewart Toland, Anders Bojesen, Inge Sokilde Pedersen, Uffe Birk Jensen, Maria A Caligo, Eitan Friedman, Raanan Berger, Yael Laitman, Johanna Rantala, Brita Arver, Niklas Loman, Ake Borg, Hans Ehrencrona, Olufunmilayo I Olopade, Jacques Simard, Douglas F Easton, Georgia Chenevix-Trench, Kenneth Offit, Fergus J Couch, Antonis C Antoniou, On behalf of CIMBA

**This PDF file includes:**

|                                                                                                                                                                   |         |
|-------------------------------------------------------------------------------------------------------------------------------------------------------------------|---------|
| <b>Table S1</b> Ethics committees that granted approval for the access and use of the data for this study                                                         | page 3  |
| <b>Table S2</b> Hormone receptor definitions used by the studies                                                                                                  | page 6  |
| <b>Table S3</b> Associations of breast cancer susceptibility variants with breast cancer by tumor ER-status after excluding prevalent cases                       | page 8  |
| <b>Table S4</b> Associations of breast cancer susceptibility variants with breast cancer by tumor PR-status                                                       | page 9  |
| <b>Table S5</b> Associations of breast cancer susceptibility variants with breast cancer by tumor HER2-status                                                     | page 12 |
| <b>Table S6</b> Associations of breast cancer susceptibility variants with breast cancer by tumor triple negative status                                          | page 15 |
| <b>Table S7</b> Associations of breast cancer susceptibility variants with ductal breast cancer                                                                   | page 18 |
| <b>Table S8</b> Associations of breast cancer susceptibility variants with lobular breast cancer                                                                  | page 21 |
| <b>Table S9</b> Associations of breast cancer susceptibility variants with breast cancer by tumor grade                                                           | page 24 |
| <b>Table S10</b> Associations of breast cancer susceptibility variants with breast cancer by nodal involvement                                                    | page 27 |
| <b>Figure legends</b>                                                                                                                                             | page 30 |
| <b>Figure S1</b> QQ-plots for SNP associations with ER-positive and –negative breast cancer in <i>BRCA1</i> carriers                                              | page 31 |
| <b>Figure S2</b> QQ-plots for SNP associations with ER-positive and –negative breast cancer in <i>BRCA2</i> carriers                                              | page 32 |
| <b>Figure S3</b> Comparison of the breast cancer associations of breast cancer susceptibility loci in BCAC, <i>BRCA1</i> and <i>BRCA2</i> carriers                | page 33 |
| <b>Figure S4</b> Comparison of the associations of breast cancer susceptibility loci by ER-status in <i>BRCA1</i> and in <i>BRCA2</i> carriers                    | page 34 |
| <b>Figure S5</b> Comparison of the associations of breast cancer susceptibility loci by ER-status in population-based studies (BCAC) and in <i>BRCA1</i> carriers | page 35 |
| <b>Figure S6</b> Comparison of the associations of breast cancer susceptibility loci by ER-status in population-based studies (BCAC) and in <i>BRCA2</i> carriers | page 36 |

**Table S1** Ethics committees that granted approval for the access and use of the data for this study

| <b>Study</b>                                                              | <b>Country</b>   | <b>Committee approval</b>                                                                                 |
|---------------------------------------------------------------------------|------------------|-----------------------------------------------------------------------------------------------------------|
| Breast Cancer Family Registry (BCFR)                                      | USA              | Institutional Review Board University of Utah                                                             |
| (BCFR - additional)                                                       | Australia        | The University of Melbourne Health Sciences Human Ethics Sub-Committee                                    |
| (BCFR - additional)                                                       | USA              | Columbia University Medical Center Institutional Review Board                                             |
| (BCFR - additional)                                                       | USA              | Northern California Cancer Center Institutional Review Board                                              |
| (BCFR - additional)                                                       | Canada           | University Health Network Research Ethics Board                                                           |
| (BCFR - additional)                                                       | Canada           | Mount Sinai Hospital Research Ethics Board                                                                |
| Baltic Familial Breast and Ovarian Cancer Consortium (BFOCC)              | Latvia,Lithuania | Centrālā medicīnas ētikas Komiteja                                                                        |
| BRCA-gene mutations and breast cancer in South African women (BMBSA)      | South Africa     | Univ. of Pretoria and Pretoria Academic Hospitals Ethics Committee                                        |
| Beckman Research Institute of the City of Hope (BRICOH)                   | USA              | UC Irvine: Office of Research Administration Institutional Review Board                                   |
| Copenhagen Breast Cancer Study (CBCS)                                     | Denmark          | De Videnskabetiske Komiteer I Region Hovedsladen                                                          |
| Spanish National Cancer Centre (CNIO)                                     | Spain            | Instituto de Salud Carlos III Comité de Bioética y Bienestar Animal                                       |
| CNIO- additional                                                          | Greece           | Bioethics committee of NCSR "Demokritos"                                                                  |
| CONSORZIO STUDI ITALIANI SUI TUMORI EREDITARI ALLA MAMMELLA (CONSIT TEAM) | Italy            | Comitato Etico Indipendente della Fondazione IRCCS "Istituto Nazionale dei Tumori"                        |
| Deutsches Krebsforschungszentrum (DKFZ)                                   | Germany          | Ethik-Kommission des Klinikums der Universität                                                            |
| (DKFZ - additional)                                                       | Columbia         | Hospital Universitario de San Ignacio Comité de Investigaciones y Etica                                   |
| (DKFZ - additional)                                                       | Pakistan         | Shaukat Khanum Memorial Cancer Hospital and Research Centre Institutional Review Board                    |
| HEreditary Breast and Ovarian study Netherlands (HEBON)                   | The Netherlands  | Protocol Toetsingscommissie van het Nederlands Kanker Instituut/Antoni van Leeuwenhoek Ziekenhuis         |
| Epidemiological study of BRCA1 and BRCA2 mutation carriers (EMBRACE)      | UK and EIRE      | Anglia & Oxford MREC                                                                                      |
| Fox Chase Cancer Center (FCCC)                                            | USA              | Institutional Review Board Fox Chase Cancer Center                                                        |
| German Consortium of Hereditary Breast and Ovarian Cancer (GC-HBOC)       | Germany          | Ethik-Kommission der Medizinischen Fakultät der Universität zu Köln                                       |
| Georgetown University (GEORGETOWN)                                        | USA              | MedStar Research Institute - Georgetown University Oncology Institutional Review Board                    |
| Genetic Modifiers of cancer risk in BRCA1/2 mutation carriers (GEMO)      | France           | Comité consultatif sur le traitement de l'information en matière de recherche dans le domaine de la santé |
| Gynecologic Oncology Group (GOG)                                          | USA              | National Cancer Institute - Cancer Prevention and Control Concept Review Committee                        |
| Hospital Clinico San Carlos (HCSC)                                        | Spain            | Comité Ético de Investigación Clínica Hospital Clínico San Carlos                                         |

|                                                                                             |                 |                                                                                                  |
|---------------------------------------------------------------------------------------------|-----------------|--------------------------------------------------------------------------------------------------|
| Helsinki Breast Cancer Study (HEBCS)                                                        | Finland         | Helsingin ja uudenmaan sairaanhoitopiiri (Helsinki University Central Hospital ethics committee) |
| Hungarian Breast and Ovarian Cancer Study (HUNBOCS)                                         | Hungary         | Institutional Review Board of the Hungarian National Institute of Oncology                       |
| Univeristy Hospital Vall d'Hebron (HVH)                                                     | Spain           | The Hospital Universitario Vall d'Hebron Clinical Research Ethics Committee                      |
| Institut Català d'Oncologia (ICO)                                                           | Spain           | Catalan Institute of Oncology Institutional Review Board                                         |
| Iceland Landspítali - University Hospital (ILUH)                                            | Iceland         | Vísindasíðanefnd National Bioethics Committee                                                    |
| Interdisciplinary Health Research International Team Breast Cancer Susceptibility (INHERIT) | Quebec - Canada | Comité d'éthique de la recherche du Centre Hospitalier Universitaire de Québec                   |
| Istituto Oncologico Veneto Hereditary Breast and Ovarian Cancer Study (IOVHBOCS)            | Italy           | Centro Oncologico Regionale Azienda Ospedale Di Padova Comitato Etico                            |
| Kathleen Cuningham Foundation Consortium for Research into Familial Breast Cancer (KCONFAB) | Australia       | Peter MacCallum Cancer Centre Ethics Committee                                                   |
| (KCONFAB - additional)                                                                      | Australia       | Queensland Institute of Medical Research - Human Research Ethics Committee                       |
| Modifiers and Genetics in Cancer (MAGIC)                                                    | USA             | University of Pennsylvania Institutional Review Board                                            |
| Mayo Clinic (MAYO)                                                                          | USA             | Mayo Clinic Institutional Review Boards                                                          |
| McGill University (MCGILL)                                                                  | Canada          | McGill Faculty of Medicine Institutional Review Board                                            |
| Memorial Sloane Kettering Cancer Center (MSKCC)                                             | USA             | Memorial Sloan-Kettering Cancer Center IRB                                                       |
| (MSKCC - additional)                                                                        | USA             | Human Biospecimen Utilization Committee                                                          |
| Modifier Study of Quantitative Effects on Disease (MOD-SQUAD)                               | USA             | Mayo Clinic Institutional Review Boards                                                          |
| General Hospital Vienna (MUV)                                                               | Austria         | Ethikkommission der Medizinischen Universität Wien                                               |
| National Cancer Institute (NCI)                                                             | USA             | NIH Ethics Office                                                                                |
| National Israeli Cancer Control Center (NICCC)                                              | Israel          | Carmel Medical Center Institutional Review Board (Helsinki Committee)                            |
| N.N. Petrov Institute of Oncology (NNPIO)                                                   | Russia          | N.N. Petrov Institutional Ethical Committee                                                      |
| Ontario Cancer Genetics Network (OCGN)                                                      | Canada          | Mount Sinai Hospital Research Ethics Board                                                       |
| The Ohio State University Comprehensive Cancer Centre (OSU-CCG)                             | USA             | Cancer Institutional Review Board                                                                |
| Odense University Hospital (OUH)                                                            | Denmark         | Den Videnskabetiske Komité for Region Syddanmark                                                 |
| Pisa Breast Cancer Study (PBCS)                                                             | Italy           | Comitato Etico per lo studio del farmaco sull'uomo                                               |
| Swedish Breast Cancer Study (SWE-BRCA)                                                      | Sweden          | Regionala Etikprövningsnämnden Stockholm                                                         |
| University of California Irvine (UCI)                                                       | USA             | UC Irvine: Office of Research Administration Institutional Review Board                          |
| University of California Los Angeles (UCLA)                                                 | USA             | UCLA Institutional Review Board                                                                  |
| University of California San Francisco                                                      | USA             | Committee on Human Research                                                                      |

|                                                                   |     |                                                       |
|-------------------------------------------------------------------|-----|-------------------------------------------------------|
| (UCSF)                                                            |     |                                                       |
| UK and Gilda Radner Familial Ovarian Cancer Registries (UKGRFOCR) | UK  | Cambridge Local Research Ethics Committee             |
| (UKGRFOCR - additional)                                           | USA | Roswell Park Cancer Institute IRB                     |
| University of Pennsylvania (UPENN)                                | USA | University of Pennsylvania Institutional Review Board |
| Women's Cancer Research Institute (WCRI)                          | USA | Cedars-Sinai Institutional Review Board               |

**Table S2** Hormone receptor definitions used by the studies

| Study        | ER/PR definition                                                                            | HER2 definition                                                 |
|--------------|---------------------------------------------------------------------------------------------|-----------------------------------------------------------------|
| BCFR-AU      | As given by medical records                                                                 | As given by medical records                                     |
| BCFR-NC      | 0: <1%, 1: ≥1% stained nuclei                                                               | 0: 0/1+/2+ (non-amplified), 1: 3+ or 2+ with FISH amplification |
| BCFR-NY      | As given by medical records                                                                 | As given by medical records                                     |
| BCFR-ON      | As given by medical records                                                                 | As given by medical records                                     |
| BCFR-PA      | As given by medical records                                                                 | As given by medical records                                     |
| BCFR-UT      | As given by medical records                                                                 | As given by medical records                                     |
| BFOCC        | 0: <10%, 1: ≥10% stained nuclei                                                             | 0: 0/1+/2+ (non-amplified), 1: 3+ or 2+ with FISH amplification |
| BIDMC        | As given by medical records                                                                 | As given by medical records                                     |
| BRICOH       | As given by medical records                                                                 | As given by medical records                                     |
| CBCS         | 0: <10%, 1: ≥10% stained nuclei                                                             | 0: 0/1+/2+ (non-amplified), 1: 3+ or 2+ with FISH amplification |
| CNIO         | 0: <10%, 1: ≥10% stained nuclei                                                             | As given by medical records                                     |
| COH          | As given by medical records                                                                 | As given by medical records                                     |
| CONSTIT TEAM | 0: <10%, 1: ≥10% stained nuclei<br>0: Allred≤2; 1: Allred>2<br>0: ≤10fmol/mg, 1: >10fmol/mg | 0: 0/1+, 1: 2+/3+<br>0: <10%, 1: ≥10% stained nuclei            |
| DEMOKRITOS   | 0: <1%, 1: ≥1% stained nuclei<br>0: <10%, 1: ≥10% stained nuclei                            | As given by medical records                                     |
| DICI         | As given by medical records                                                                 | 0: 0/1+/2+ (non-amplified), 1: 3+ or 2+ with FISH amplification |
| DKFZ         | 0: <10%, 1: ≥10% stained nuclei                                                             | 0: 0/1+/2+ (non-amplified), 1: 3+ or 2+ with FISH amplification |
| DKFZ         | 0: Immunoreactive Score 0, 1:<br>IRS≥1                                                      |                                                                 |
| EMBRACE      | As given by medical records                                                                 | As given by medical records                                     |
| FCCC         | As given by medical records                                                                 | As given by medical records                                     |
| GC-HBOC      | 0: Remmele-Score=0, 1:<br>Remmele≥1                                                         | 0: 0/1+/2+ (non-amplified), 1: 3+ or 2+ with FISH amplification |
| GEMO         | 0: <10%, 1: ≥10% stained nuclei                                                             | 0: 0/1+/2+ (non-amplified), 1: 3+ or 2+ with FISH amplification |
| GEORGETOWN   | 0: <10%, 1: ≥10% stained nuclei                                                             | 0: 0/1+/2+ (non-amplified), 1: 3+ or 2+ with FISH amplification |
| G-FAST       | As given by medical records                                                                 | As given by medical records                                     |
| HCSC         | 0: Allred≤2; 1: Allred>2                                                                    | 0: 0/1+/2+ (non-amplified), 1: 3+ or 2+ with FISH amplification |
| HEBCS        | 0: <10%, 1: ≥10% stained nuclei                                                             | 0: <6 CISH HER2 copy numbers, 1: ≥6 CISH replications           |
| HEBON        | As given by medical records                                                                 | As given by medical records                                     |
| HRBCP        | As given by medical records                                                                 | As given by medical records                                     |
| ICO          | As given by medical records                                                                 | As given by medical records                                     |
| IHCC         | 0: <1%, 1: ≥1% stained nuclei                                                               | 0: 0/1+/2+ (non-amplified), 1: 3+ or 2+ with FISH amplification |
| ILUH         | 0: Immunoreactive Score 0, 1:<br>IRS≥1                                                      | 0: 0/1+/2+ (non-amplified), 1: 3+ or 2+ with FISH amplification |

|          |                                     |                                                                 |
|----------|-------------------------------------|-----------------------------------------------------------------|
| INHERIT  | As given by medical records         | As given by medical records                                     |
| IOVHBOCS | As given by medical records         | As given by medical records                                     |
| IPOBCS   | 0: <1%, 1: ≥1% stained nuclei       | 0: 0/1+/2+ (non-amplified), 1: 3+ or 2+ with FISH amplification |
| KCONFAB  | 0: Allred≤2; 1: Allred>2            | 0: 0/1+/2+, 1: 3+                                               |
| KOHBRA   | As given by medical records         | As given by medical records                                     |
| MAGIC    | As given by medical records         | 0: 0/1+/2+ (non-amplified), 1: 3+ or 2+ with FISH amplification |
| MAYO     | As given by medical records         | 0: 0/1+/2+ (non-amplified), 1: 3+ or 2+ with FISH amplification |
| MODSQUAD | As given by medical records         | As given by medical records                                     |
| MSKCC    | As given by medical records         | As given by medical records                                     |
| MUV      | 0: <10%, 1: ≥10% stained nuclei     | As given by medical records                                     |
| MUV      | 0: Immunoreactive Score 0, 1: IRS≥1 |                                                                 |
| NCI      | As given by medical records         | As given by medical records                                     |
| NNPIO    | As given by medical records         | As given by medical records                                     |
| OCGN     | As given by medical records         | As given by medical records                                     |
| OSU CCG  | As given by medical records         | As given by medical records                                     |
| OUH      | 0: <10%, 1: ≥10% stained nuclei     | 0: 0/1+/2+ (non-amplified), 1: 3+ or amplified by FISH          |
| PBCS     | 0: <1%, 1: ≥1% stained nuclei       | 0: 0/1+, 1: 2+/3+                                               |
| SEABASS  | 0: <10%, 1: ≥10% stained nuclei     | 0: 0/1+, 1: 2+/3+                                               |
| SWE-BRCA | 0: <10%, 1: ≥10% stained nuclei     | 0: 0/1+/2+ (non-amplified), 1: 3+ or 2+ with FISH amplification |
| UCHICAGO | 0: <10%, 1: ≥10% stained nuclei     | As given by medical records                                     |
| UCSF     | As given by medical records         | As given by medical records                                     |
| UKGRFOCR | As given by medical records         | As given by medical records                                     |
| UPENN    | As given by medical records         | As given by medical records                                     |
| WCP      | 0: <5%, 1: ≥5% stained nuclei       | As given by medical records                                     |

Notes: Allred: cell proportion score (0-5) + staining intensity score (0-3); Remmele & Immunoreactive: cell proportion score (0-4) x staining intensity score (0-3); FISH = fluorescence in-situ hybridization

**Table S3** Associations of previously reported breast cancer susceptibility variants with breast cancer by tumor ER-status in *BRCA1* and *BRCA2* carriers after excluding prevalent breast cancer cases. Restricted to variants with  $p < 0.01$  with ER-positive or ER-negative disease in the analyses using the complete data. Estimates based on the entire sample are also given for comparison.

| SNP (locus)                  | Sample             | HR for ER-positive (95%CI) | HR for ER-negative (95%CI) |
|------------------------------|--------------------|----------------------------|----------------------------|
| <b><i>BRCA1</i> carriers</b> |                    |                            |                            |
| rs4245739<br>(1q32.1)        | all                | 1.02 (0.91-1.13)           | 1.12 (1.07-1.19)           |
|                              | no prevalent cases | 1.07 (0.94-1.22)           | 1.08 (1.02-1.16)           |
| rs13387042<br>(2q35)         | all                | 0.86 (0.78-0.95)           | 1.02 (0.97-1.07)           |
|                              | no prevalent cases | 0.85 (0.76-0.96)           | 1.00 (0.95-1.07)           |
| rs10069690<br>(5p15.33)      | all                | 1.09 (0.98-1.22)           | 1.24 (1.18-1.31)           |
|                              | no prevalent cases | 1.05 (0.92-1.19)           | 1.21 (1.14-1.30)           |
| rs3757318<br>(6q25.1)        | all                | 1.06 (0.89-1.26)           | 1.24 (1.14-1.35)           |
|                              | no prevalent cases | 1.17 (0.95-1.43)           | 1.19 (1.07-1.32)           |
| rs7904519<br>(10q25.2)       | all                | 1.12 (1.02-1.23)           | 1.09 (1.04-1.14)           |
|                              | no prevalent cases | 1.10 (0.99-1.24)           | 1.08 (1.02-1.15)           |
| rs2981579<br>(10q26.12)      | all                | 1.29 (1.17-1.43)           | 0.92 (0.87-0.96)           |
|                              | no prevalent cases | 1.25 (1.11-1.41)           | 0.94 (0.88-0.99)           |
| rs3817198<br>(11p15.5)       | all                | 1.07 (0.97-1.18)           | 1.08 (1.03-1.14)           |
|                              | no prevalent cases | 1.07 (0.95-1.20)           | 1.06 (1.00-1.13)           |
| rs10771399<br>(12p11.22)     | all                | 0.91 (0.78-1.06)           | 0.83 (0.77-0.90)           |
|                              | no prevalent cases | 0.92 (0.76-1.11)           | 0.83 (0.75-0.92)           |
| rs3803662<br>(16q12.1)       | all                | 1.22 (1.10-1.35)           | 1.01 (0.96-1.07)           |
|                              | no prevalent cases | 1.27 (1.12-1.44)           | 1.01 (0.94-1.08)           |
| rs8170<br>(19p13.11)         | all                | 1.06 (0.95-1.20)           | 1.22 (1.15-1.30)           |
|                              | no prevalent cases | 1.14 (0.98-1.31)           | 1.21 (1.13-1.31)           |
| <b><i>BRCA2</i> carriers</b> |                    |                            |                            |
| rs10069690<br>(5p15.33)      | all                | 1.08 (1.00-1.17)           | 1.25 (1.08-1.44)           |
|                              | no prevalent cases | 1.04 (0.94-1.14)           | 1.30 (1.08-1.56)           |
| rs9348512<br>(6q24.3)        | all                | 0.86 (0.80-0.92)           | 0.79 (0.69-0.91)           |
|                              | no prevalent cases | 0.85 (0.78-0.93)           | 0.78 (0.65-0.93)           |
| rs3757318<br>(6q25.1)        | all                | 1.09 (0.96-1.24)           | 1.33 (1.07-1.65)           |
|                              | no prevalent cases | 0.98 (0.83-1.14)           | 1.45 (1.11-1.91)           |
| rs2981579<br>(10q26.12)      | all                | 1.29 (1.21-1.38)           | 1.05 (0.92-1.20)           |
|                              | no prevalent cases | 1.29 (1.19-1.40)           | 1.09 (0.92-1.28)           |
| rs3817198<br>(11p15.5)       | all                | 1.15 (1.07-1.24)           | 0.98 (0.85-1.13)           |
|                              | no prevalent cases | 1.10 (1.01-1.20)           | 1.04 (0.87-1.24)           |
| rs554219<br>(11q13.3)        | all                | 1.15 (1.04-1.26)           | 0.90 (0.73-1.10)           |
|                              | no prevalent cases | 1.14 (1.02-1.28)           | 0.86 (0.66-1.13)           |
| rs10771399<br>(12p11.22)     | all                | 0.94 (0.84-1.05)           | 0.72 (0.56-0.91)           |
|                              | no prevalent cases | 0.92 (0.80-1.05)           | 0.67 (0.49-0.90)           |
| rs1292011<br>(12q24.21)      | all                | 0.88 (0.82-0.95)           | 1.07 (0.94-1.23)           |
|                              | no prevalent cases | 0.93 (0.85-1.01)           | 1.14 (0.96-1.36)           |
| rs3803662<br>(16q12.1)       | all                | 1.27 (1.18-1.36)           | 1.12 (0.97-1.30)           |
|                              | no prevalent cases | 1.26 (1.15-1.37)           | 1.14 (0.95-1.36)           |



**Table S4** Associations of 74 previously reported breast cancer susceptibility variants with breast cancer by tumor PR-status in *BRCA1* and *BRCA2* carriers. Associations with  $p < 0.01$  in bold.

| Locus      | SNP        | Position   | Ref <sup>#</sup> | Eff <sup>#</sup> | <i>BRCA1</i> carriers |                                         |                  |                                        |                                        | <i>BRCA2</i> carriers |      |                  |                                        |           |
|------------|------------|------------|------------------|------------------|-----------------------|-----------------------------------------|------------------|----------------------------------------|----------------------------------------|-----------------------|------|------------------|----------------------------------------|-----------|
|            |            |            |                  |                  | PR-negative           |                                         | PR-positive      |                                        | $p_{het}$                              | PR-negative           |      | PR-positive      |                                        | $p_{het}$ |
| HR (95%CI) | p          | HR (95%CI) | p                | HR (95%CI)       | p                     | HR (95%CI)                              | p                | HR (95%CI)                             |                                        | p                     |      |                  |                                        |           |
| 1p36.22    | rs616488   | 10566215   | A                | G                | 0.95 (0.91-1.00)      | 0.08                                    | 1.00 (0.89-1.11) | 0.95                                   | 0.51                                   | 0.96 (0.86-1.08)      | 0.54 | 0.99 (0.91-1.07) | 0.78                                   | 0.75      |
| 1p13.2     | rs12022378 | 114448389  | G                | A                | 1.04 (0.97-1.11)      | 0.24                                    | 1.01 (0.87-1.16) | 0.93                                   | 0.71                                   | 1.02 (0.87-1.18)      | 0.82 | 1.04 (0.94-1.15) | 0.43                                   | 0.80      |
| 1p11.2     | rs11249433 | 121280613  | A                | G                | 0.99 (0.94-1.04)      | 0.59                                    | 1.02 (0.92-1.14) | 0.68                                   | 0.58                                   | 1.14 (1.02-1.27)      | 0.02 | 1.01 (0.93-1.09) | 0.80                                   | 0.11      |
| 1q32.1_1   | rs6678914  | 202187176  | G                | A                | 0.96 (0.91-1.00)      | 0.08                                    | 1.08 (0.97-1.20) | 0.14                                   | 0.05                                   | 0.95 (0.84-1.06)      | 0.35 | 1.09 (1.01-1.18) | 0.02                                   | 0.06      |
| 1q32.1_2   | rs4245739  | 204518842  | A                | C                | 1.10 (1.04-1.16)      | <b><math>3.2 \times 10^{-4}</math></b>  | 1.09 (0.97-1.22) | 0.16                                   | 0.82                                   | 1.07 (0.95-1.20)      | 0.28 | 0.92 (0.85-1.01) | 0.07                                   | 0.07      |
| 2p24.1     | rs12710696 | 19320803   | G                | A                | 1.00 (0.95-1.05)      | 0.91                                    | 1.06 (0.95-1.18) | 0.30                                   | 0.40                                   | 1.02 (0.92-1.14)      | 0.66 | 0.99 (0.91-1.07) | 0.76                                   | 0.61      |
| 2q14.2     | rs4849887  | 121245122  | G                | A                | 1.02 (0.94-1.10)      | 0.67                                    | 1.04 (0.88-1.23) | 0.66                                   | 0.83                                   | 0.83 (0.68-1.01)      | 0.06 | 1.06 (0.94-1.20) | 0.32                                   | 0.05      |
| 2q31.1     | rs2016394  | 172972971  | G                | A                | 1.02 (0.97-1.07)      | 0.53                                    | 1.00 (0.90-1.12) | 0.96                                   | 0.84                                   | 1.04 (0.93-1.16)      | 0.46 | 0.96 (0.89-1.04) | 0.34                                   | 0.28      |
| 2q31.1     | rs1550623  | 174212894  | A                | G                | 1.02 (0.95-1.09)      | 0.58                                    | 0.98 (0.84-1.14) | 0.78                                   | 0.65                                   | 0.99 (0.86-1.15)      | 0.89 | 0.96 (0.87-1.07) | 0.45                                   | 0.74      |
| 2q35       | rs13387042 | 217905832  | A                | G                | 1.03 (0.98-1.08)      | 0.23                                    | 0.82 (0.74-0.91) | <b><math>2.3 \times 10^{-4}</math></b> | <b><math>2.5 \times 10^{-4}</math></b> | 1.03 (0.93-1.15)      | 0.54 | 0.96 (0.90-1.04) | 0.34                                   | 0.31      |
| 2q35       | rs16857609 | 218296508  | G                | A                | 1.03 (0.97-1.09)      | 0.31                                    | 1.11 (0.99-1.25) | 0.09                                   | 0.29                                   | 0.96 (0.84-1.09)      | 0.53 | 0.96 (0.89-1.05) | 0.41                                   | 0.95      |
| 3p26.1     | rs6762644  | 4742276    | A                | G                | 1.02 (0.97-1.07)      | 0.44                                    | 1.11 (0.99-1.23) | 0.07                                   | 0.22                                   | 1.04 (0.93-1.17)      | 0.48 | 0.95 (0.88-1.03) | 0.26                                   | 0.25      |
| 3p24.1     | rs4973768  | 27416013   | G                | A                | 1.01 (0.96-1.06)      | 0.76                                    | 1.04 (0.94-1.16) | 0.39                                   | 0.54                                   | 1.07 (0.95-1.19)      | 0.26 | 1.10 (1.01-1.18) | 0.02                                   | 0.71      |
| 3p24.1     | rs12493607 | 30682939   | C                | G                | 0.98 (0.93-1.03)      | 0.51                                    | 1.03 (0.92-1.15) | 0.61                                   | 0.48                                   | 0.98 (0.87-1.1)       | 0.73 | 0.98 (0.90-1.06) | 0.64                                   | 0.99      |
| 4q24       | rs9790517  | 106084778  | G                | A                | 0.99 (0.94-1.05)      | 0.73                                    | 0.96 (0.85-1.08) | 0.51                                   | 0.67                                   | 1.02 (0.9-1.17)       | 0.71 | 0.95 (0.86-1.04) | 0.27                                   | 0.37      |
| 4q34.1     | rs6828523  | 175846426  | C                | A                | 1.03 (0.96-1.12)      | 0.39                                    | 1.00 (0.85-1.19) | 0.97                                   | 0.76                                   | 1.05 (0.88-1.25)      | 0.58 | 0.95 (0.83-1.08) | 0.41                                   | 0.38      |
| 5p15.33    | rs10069690 | 1279790    | G                | A                | 1.24 (1.17-1.30)      | <b><math>1.3 \times 10^{-14}</math></b> | 1.10 (0.98-1.24) | 0.09                                   | 0.11                                   | 1.16 (1.02-1.31)      | 0.02 | 1.09 (1.00-1.19) | 0.05                                   | 0.46      |
| 5p15.33    | rs7725218  | 1282414    | G                | A                | 1.09 (1.04-1.15)      | <b><math>5.0 \times 10^{-4}</math></b>  | 1.03 (0.93-1.15) | 0.53                                   | 0.41                                   | 1.04 (0.93-1.17)      | 0.49 | 1.06 (0.98-1.15) | 0.14                                   | 0.79      |
| 5p15.33    | rs2736108  | 1297488    | G                | A                | 0.87 (0.82-0.92)      | <b><math>3.9 \times 10^{-7}</math></b>  | 0.97 (0.86-1.08) | 0.55                                   | 0.12                                   | 0.90 (0.79-1.02)      | 0.09 | 0.95 (0.88-1.04) | 0.28                                   | 0.46      |
| 5p12       | rs10941679 | 44706498   | A                | G                | 0.96 (0.91-1.02)      | 0.21                                    | 1.08 (0.95-1.22) | 0.23                                   | 0.13                                   | 0.99 (0.87-1.13)      | 0.91 | 1.12 (1.03-1.22) | <b><math>9.3 \times 10^{-3}</math></b> | 0.14      |
| 5q11.2     | rs889312   | 56031884   | A                | C                | 0.99 (0.94-1.05)      | 0.79                                    | 1.10 (0.98-1.24) | 0.10                                   | 0.13                                   | 0.98 (0.87-1.1)       | 0.73 | 1.08 (0.99-1.17) | 0.09                                   | 0.23      |
| 5q11.3     | rs10472076 | 58184061   | A                | G                | 0.99 (0.94-1.04)      | 0.58                                    | 1.08 (0.97-1.20) | 0.15                                   | 0.15                                   | 0.99 (0.88-1.11)      | 0.86 | 0.99 (0.92-1.08) | 0.85                                   | 0.97      |
| 5q11.3     | rs1353747  | 58337481   | A                | C                | 0.95 (0.88-1.04)      | 0.27                                    | 1.07 (0.9-1.27)  | 0.45                                   | 0.28                                   | 0.94 (0.77-1.14)      | 0.52 | 0.96 (0.84-1.10) | 0.56                                   | 0.85      |
| 5q33.3     | rs1432679  | 158244083  | A                | G                | 1.04 (0.99-1.09)      | 0.14                                    | 1.08 (0.98-1.20) | 0.13                                   | 0.48                                   | 1.00 (0.9-1.11)       | 0.98 | 1.01 (0.94-1.09) | 0.73                                   | 0.84      |
| 6p25.3     | rs11242675 | 1318878    | A                | G                | 0.94 (0.89-0.99)      | 0.01                                    | 1.05 (0.94-1.17) | 0.43                                   | 0.10                                   | 0.97 (0.86-1.09)      | 0.59 | 1.03 (0.95-1.12) | 0.47                                   | 0.43      |

|          |                     |           |   |   |                  |                             |                  |                            |                            |                  |                            |                  |                             |      |
|----------|---------------------|-----------|---|---|------------------|-----------------------------|------------------|----------------------------|----------------------------|------------------|----------------------------|------------------|-----------------------------|------|
| 6p24.3   | rs9348512           | 10456706  | C | A | 1.00 (0.95-1.05) | 0.92                        | 0.99 (0.89-1.11) | 0.88                       | 0.93                       | 0.84 (0.75-0.94) | <b>2.8x10<sup>-3</sup></b> | 0.85 (0.78-0.92) | <b>3.8x10<sup>-5</sup></b>  | 0.96 |
| 6p23     | rs204247            | 13722523  | A | G | 0.99 (0.94-1.04) | 0.69                        | 1.04 (0.94-1.15) | 0.50                       | 0.45                       | 1.07 (0.96-1.2)  | 0.23                       | 1.10 (1.02-1.19) | 0.01                        | 0.71 |
| 6q14     | rs17530068          | 82193109  | A | G | 1.03 (0.97-1.09) | 0.30                        | 1.03 (0.91-1.16) | 0.66                       | 0.97                       | 0.98 (0.86-1.12) | 0.79                       | 1.16 (1.07-1.27) | <b>6.6x10<sup>-4</sup></b>  | 0.05 |
| 6q25.1   | rs3757318           | 151914113 | G | A | 1.22 (1.12-1.33) | <b>2.5x10<sup>-6</sup></b>  | 1.10 (0.91-1.33) | 0.31                       | 0.34                       | 1.19 (0.98-1.45) | 0.08                       | 1.12 (0.97-1.29) | 0.11                        | 0.63 |
| 6q25.1   | rs2046210           | 151948366 | G | A | 1.18 (1.13-1.24) | <b>2.0x10<sup>-11</sup></b> | 1.09 (0.98-1.21) | 0.12                       | 0.19                       | 1.14 (1.01-1.28) | 0.03                       | 1.01 (0.94-1.10) | 0.73                        | 0.14 |
| 7q35     | rs720475            | 144074929 | G | A | 0.98 (0.92-1.03) | 0.42                        | 0.98 (0.87-1.11) | 0.78                       | 0.95                       | 0.93 (0.82-1.06) | 0.28                       | 1.02 (0.93-1.11) | 0.71                        | 0.29 |
| 8p12     | rs9693444           | 29509616  | C | A | 0.99 (0.94-1.04) | 0.63                        | 1.08 (0.97-1.20) | 0.18                       | 0.18                       | 1.00 (0.89-1.12) | 0.95                       | 0.98 (0.90-1.06) | 0.58                        | 0.81 |
| 8q21.11  | rs6472903           | 76230301  | A | C | 1.02 (0.96-1.09) | 0.51                        | 0.96 (0.84-1.11) | 0.59                       | 0.47                       | 0.97 (0.84-1.13) | 0.73                       | 0.97 (0.87-1.08) | 0.58                        | 0.98 |
| 8q21.11  | rs2943559           | 76417937  | A | G | 1.07 (0.99-1.17) | 0.10                        | 1.01 (0.83-1.22) | 0.95                       | 0.57                       | 1.11 (0.92-1.34) | 0.29                       | 1.10 (0.97-1.25) | 0.15                        | 0.95 |
| 8q24.21  | rs11780156          | 129194641 | G | A | 0.98 (0.92-1.04) | 0.44                        | 0.85 (0.74-0.97) | 0.02                       | 0.08                       | 0.99 (0.86-1.13) | 0.89                       | 0.96 (0.87-1.06) | 0.43                        | 0.76 |
| 8q24.21  | rs13281615          | 128355618 | A | G | 1.00 (0.96-1.06) | 0.83                        | 1.06 (0.96-1.18) | 0.27                       | 0.39                       | 1.01 (0.91-1.13) | 0.80                       | 1.04 (0.96-1.12) | 0.35                        | 0.76 |
| 9p21.3   | rs1011970           | 22062134  | C | A | 1.05 (0.99-1.12) | 0.11                        | 0.90 (0.77-1.04) | 0.16                       | 0.07                       | 1.06 (0.92-1.22) | 0.44                       | 1.01 (0.92-1.12) | 0.82                        | 0.64 |
| 9q31.2   | rs10759243          | 110306115 | C | A | 0.97 (0.92-1.02) | 0.27                        | 1.02 (0.91-1.14) | 0.74                       | 0.47                       | 0.98 (0.86-1.11) | 0.70                       | 1.01 (0.93-1.10) | 0.83                        | 0.69 |
| 9q31.2   | rs865686            | 110888478 | A | C | 1.01 (0.96-1.07) | 0.56                        | 0.92 (0.82-1.03) | 0.13                       | 0.13                       | 1.04 (0.92-1.17) | 0.53                       | 0.97 (0.89-1.05) | 0.39                        | 0.34 |
| 10p12.31 | rs7072776           | 22032942  | G | A | 0.96 (0.91-1.01) | 0.16                        | 1.07 (0.96-1.20) | 0.20                       | 0.10                       | 0.92 (0.81-1.03) | 0.14                       | 1.02 (0.94-1.11) | 0.57                        | 0.13 |
| 10p12.31 | rs11814448          | 22315843  | A | C | 1.17 (1.00-1.36) | 0.05                        | 1.02 (0.71-1.46) | 0.91                       | 0.52                       |                  |                            |                  |                             |      |
| 10q21.2  | rs10995190          | 64278682  | G | A | 1.02 (0.96-1.09) | 0.53                        | 0.87 (0.75-1.01) | 0.06                       | 0.06                       | 0.89 (0.76-1.04) | 0.16                       | 0.97 (0.87-1.08) | 0.56                        | 0.42 |
| 10q22.3  | rs704010            | 80841148  | G | A | 0.99 (0.94-1.04) | 0.56                        | 1.14 (1.02-1.26) | 0.02                       | 0.02                       | 0.96 (0.86-1.07) | 0.46                       | 1.03 (0.95-1.11) | 0.44                        | 0.31 |
| 10q25.2  | rs7904519           | 114773927 | A | G | 1.09 (1.04-1.15) | <b>3.0x10<sup>-4</sup></b>  | 1.10 (1.00-1.22) | 0.06                       | 0.88                       | 0.92 (0.82-1.02) | 0.13                       | 1.07 (1.00-1.16) | 0.06                        | 0.03 |
| 10q26.12 | rs2981579           | 123337335 | G | A | 0.92 (0.88-0.97) | <b>8.8x10<sup>-4</sup></b>  | 1.33 (1.20-1.48) | <b>1.3x10<sup>-7</sup></b> | <b>5.2x10<sup>-9</sup></b> | 1.13 (1.01-1.26) | 0.03                       | 1.29 (1.20-1.40) | <b>5.7x10<sup>-11</sup></b> | 0.06 |
| 10q26.12 | rs11199914          | 123093901 | G | A | 1.03 (0.98-1.09) | 0.21                        | 0.99 (0.89-1.11) | 0.90                       | 0.55                       | 0.91 (0.81-1.03) | 0.14                       | 0.98 (0.90-1.06) | 0.55                        | 0.40 |
| 11p15.5  | rs3817198           | 1909006   | A | G | 1.07 (1.02-1.13) | <b>8.6x10<sup>-3</sup></b>  | 1.11 (0.99-1.24) | 0.07                       | 0.59                       | 1.07 (0.95-1.21) | 0.23                       | 1.13 (1.04-1.23) | <b>2.7x10<sup>-3</sup></b>  | 0.49 |
| 11q13.1  | rs3903072           | 65583066  | C | A | 1.00 (0.95-1.05) | 0.95                        | 0.96 (0.86-1.06) | 0.39                       | 0.45                       | 0.92 (0.82-1.02) | 0.12                       | 1.00 (0.93-1.08) | 0.98                        | 0.21 |
| 11q13.3  | rs554219            | 69331642  | C | G | 0.99 (0.92-1.07) | 0.89                        | 1.16 (1.00-1.35) | 0.05                       | 0.09                       | 1.01 (0.85-1.19) | 0.94                       | 1.14 (1.02-1.27) | 0.02                        | 0.25 |
| 11q13.3  | c11_pos690<br>88342 | 69379161  | C | A | 0.98 (0.88-1.09) | 0.70                        | 1.25 (1.01-1.54) | 0.04                       | 0.06                       | 0.97 (0.77-1.23) | 0.81                       | 1.12 (0.96-1.31) | 0.15                        | 0.34 |
| 11q13.3  | rs494406            | 69344241  | G | A | 1.00 (0.95-1.06) | 0.89                        | 1.07 (0.95-1.21) | 0.24                       | 0.34                       | 1.06 (0.94-1.20) | 0.31                       | 1.04 (0.96-1.14) | 0.34                        | 0.79 |
| 11q24.3  | rs11820646          | 129461171 | G | A | 0.93 (0.89-0.98) | <b>6.0x10<sup>-3</sup></b>  | 0.91 (0.82-1.02) | 0.10                       | 0.76                       | 0.87 (0.77-0.97) | 0.01                       | 0.94 (0.87-1.02) | 0.14                        | 0.27 |
| 12p13.1  | rs12422552          | 14413931  | G | C | 1.04 (0.98-1.09) | 0.19                        | 0.92 (0.81-1.04) | 0.17                       | 0.10                       | 1.02 (0.90-1.16) | 0.72                       | 0.98 (0.90-1.07) | 0.69                        | 0.62 |
| 12p11.22 | rs10771399          | 28155080  | A | G | 0.86 (0.79-0.93) | <b>1.6x10<sup>-4</sup></b>  | 0.82 (0.69-0.99) | 0.04                       | 0.72                       | 0.86 (0.72-1.03) | 0.10                       | 0.90 (0.79-1.03) | 0.12                        | 0.68 |

|           |            |           |   |   |                  |                            |                  |                            |      |                  |      |                  |                            |                            |
|-----------|------------|-----------|---|---|------------------|----------------------------|------------------|----------------------------|------|------------------|------|------------------|----------------------------|----------------------------|
| 12q22     | rs17356907 | 96027759  | A | G | 0.96 (0.91-1.01) | 0.12                       | 0.93 (0.82-1.05) | 0.22                       | 0.65 | 0.93 (0.82-1.05) | 0.23 | 1.02 (0.94-1.11) | 0.56                       | 0.21                       |
| 12q24.21  | rs1292011  | 115836522 | A | G | 1.04 (0.99-1.09) | 0.12                       | 0.88 (0.79-0.98) | 0.02                       | 0.01 | 0.95 (0.85-1.06) | 0.34 | 0.91 (0.84-0.99) | 0.02                       | 0.59                       |
| 13q13.1   | rs11571833 | 32972626  | T | A | 1.01 (0.77-1.31) | 0.96                       | 1.09 (0.64-1.84) | 0.75                       | 0.81 | 0.99 (0.70-1.39) | 0.93 | 0.94 (0.72-1.21) | 0.62                       | 0.82                       |
| 14q13.3   | rs2236007  | 37132769  | G | A | 0.96 (0.91-1.02) | 0.22                       | 0.98 (0.86-1.12) | 0.78                       | 0.81 | 1.17 (1.03-1.33) | 0.02 | 0.90 (0.82-1.00) | 0.04                       | <b>3.9x10<sup>-3</sup></b> |
| 14q24.1   | rs2588809  | 68660428  | G | A | 0.93 (0.87-0.99) | 0.02                       | 1.05 (0.93-1.20) | 0.41                       | 0.09 | 1.01 (0.87-1.17) | 0.89 | 1.01 (0.91-1.11) | 0.87                       | 0.98                       |
| 14q24.1   | rs999737   | 69034682  | G | A | 0.99 (0.94-1.05) | 0.77                       | 0.83 (0.73-0.96) | <b>9.3x10<sup>-3</sup></b> | 0.03 | 0.95 (0.83-1.08) | 0.42 | 0.99 (0.90-1.08) | 0.82                       | 0.61                       |
| 14q32.11  | rs941764   | 91841069  | A | G | 1.02 (0.97-1.07) | 0.48                       | 1.06 (0.94-1.19) | 0.35                       | 0.59 | 1.03 (0.92-1.15) | 0.65 | 1.03 (0.95-1.11) | 0.49                       | 0.97                       |
| 16q12.1_1 | rs3803662  | 52586341  | G | A | 1.03 (0.97-1.08) | 0.33                       | 1.18 (1.06-1.32) | <b>3.7x10<sup>-3</sup></b> | 0.03 | 1.15 (1.02-1.29) | 0.02 | 1.28 (1.18-1.39) | <b>2.3x10<sup>-9</sup></b> | 0.15                       |
| 16q12.1_2 | rs11075995 | 53855291  | A | T | 1.00 (0.95-1.06) | 0.98                       | 1.06 (0.94-1.19) | 0.35                       | 0.42 | 1.01 (0.89-1.16) | 0.84 | 1.02 (0.93-1.12) | 0.63                       | 0.93                       |
| 16q12.1_2 | rs17817449 | 53813367  | A | C | 0.93 (0.89-0.98) | <b>4.1x10<sup>-3</sup></b> | 1.03 (0.93-1.15) | 0.53                       | 0.09 | 1.00 (0.89-1.12) | 0.97 | 0.91 (0.84-0.98) | 0.02                       | 0.21                       |
| 16q23.2   | rs13329835 | 80650805  | A | G | 1.06 (1.00-1.12) | 0.06                       | 0.99 (0.87-1.12) | 0.90                       | 0.40 | 1.03 (0.91-1.16) | 0.64 | 1.03 (0.95-1.13) | 0.43                       | 0.94                       |
| 17q22     | rs6504950  | 53056471  | G | A | 1.00 (0.94-1.05) | 0.86                       | 0.94 (0.83-1.06) | 0.30                       | 0.40 | 1.03 (0.91-1.16) | 0.64 | 1.05 (0.96-1.14) | 0.29                       | 0.82                       |
| 18q11.2   | rs527616   | 24337424  | C | G | 0.97 (0.92-1.02) | 0.27                       | 1.05 (0.95-1.18) | 0.33                       | 0.20 | 0.97 (0.87-1.08) | 0.58 | 0.96 (0.88-1.03) | 0.25                       | 0.84                       |
| 18q11.2   | rs1436904  | 22824665  | A | C | 1.00 (0.95-1.05) | 1.00                       | 0.96 (0.86-1.07) | 0.43                       | 0.49 | 0.97 (0.87-1.08) | 0.55 | 0.95 (0.88-1.03) | 0.19                       | 0.79                       |
| 19p13.11  | rs8170     | 17389704  | G | A | 1.20 (1.13-1.28) | <b>4.6x10<sup>-9</sup></b> | 1.12 (0.99-1.28) | 0.08                       | 0.38 | 0.90 (0.78-1.04) | 0.17 | 1.02 (0.93-1.13) | 0.66                       | 0.19                       |
| 19p13.11  | rs4808801  | 18571141  | A | G | 0.98 (0.93-1.03) | 0.44                       | 0.99 (0.89-1.10) | 0.81                       | 0.91 | 0.96 (0.86-1.08) | 0.50 | 0.97 (0.9-1.06)  | 0.51                       | 0.87                       |
| 19q13.31  | rs3760982  | 44286513  | G | A | 1.04 (0.99-1.09) | 0.13                       | 1.02 (0.92-1.13) | 0.69                       | 0.80 | 1.02 (0.92-1.13) | 0.71 | 1.07 (0.99-1.15) | 0.08                       | 0.50                       |
| 21q21.1   | rs2823093  | 16520832  | G | A | 0.96 (0.91-1.01) | 0.12                       | 0.93 (0.83-1.04) | 0.22                       | 0.66 | 1.00 (0.88-1.14) | 0.96 | 0.92 (0.84-1.00) | 0.05                       | 0.32                       |
| 22q12.2   | rs132390   | 29621477  | A | G | 0.94 (0.82-1.08) | 0.38                       | 1.14 (0.88-1.48) | 0.33                       | 0.23 | 1.13 (0.82-1.54) | 0.45 | 1.19 (0.97-1.46) | 0.09                       | 0.78                       |
| 22q13.1   | rs6001930  | 40876234  | A | G | 1.06 (0.98-1.15) | 0.12                       | 1.10 (0.94-1.30) | 0.24                       | 0.70 | 0.95 (0.79-1.14) | 0.58 | 1.05 (0.93-1.19) | 0.40                       | 0.37                       |

# Reference and effect allele

**Table S5** Associations of 74 previously reported breast cancer susceptibility variants with breast cancer by tumor HER2-status in *BRCA1* and *BRCA2* carriers. Associations with p<0.01 in bold.

| Locus    | SNP        | Position  | Ref <sup>#</sup> | Eff <sup>#</sup> | <i>BRCA1</i> carriers |                             |                  |      | <i>BRCA2</i> carriers |                  |                            |                  |      |      |
|----------|------------|-----------|------------------|------------------|-----------------------|-----------------------------|------------------|------|-----------------------|------------------|----------------------------|------------------|------|------|
|          |            |           |                  |                  | HER2-negative         |                             | HER2-positive    |      | HER2-negative         |                  | HER2-positive              |                  | Phet |      |
|          |            |           |                  |                  | HR (95%CI)            | p                           | HR (95%CI)       | p    | Phet                  | HR (95%CI)       | p                          | HR (95%CI)       | p    | Phet |
| 1p36.22  | rs616488   | 10566215  | A                | G                | 0.96 (0.92-1.01)      | 0.13                        | 0.95 (0.77-1.16) | 0.61 | 0.90                  | 1.00 (0.93-1.07) | 0.95                       | 0.86 (0.63-1.16) | 0.32 | 0.38 |
| 1p13.2   | rs12022378 | 114448389 | G                | A                | 1.03 (0.97-1.1)       | 0.32                        | 1.13 (0.86-1.48) | 0.37 | 0.54                  | 1.08 (0.98-1.18) | 0.11                       | 0.87 (0.61-1.24) | 0.45 | 0.29 |
| 1p11.2   | rs11249433 | 121280613 | A                | G                | 1.00 (0.96-1.05)      | 0.95                        | 0.87 (0.71-1.07) | 0.19 | 0.22                  | 1.05 (0.98-1.13) | 0.16                       | 1.09 (0.84-1.42) | 0.51 | 0.80 |
| 1q32.1_1 | rs6678914  | 202187176 | G                | A                | 0.95 (0.91-1.00)      | 0.05                        | 1.20 (0.99-1.45) | 0.06 | 0.03                  | 1.04 (0.97-1.12) | 0.23                       | 1.15 (0.9-1.47)  | 0.26 | 0.47 |
| 1q32.1_2 | rs4245739  | 204518842 | A                | C                | 1.10 (1.05-1.16)      | <b>1.6x10<sup>-4</sup></b>  | 1.02 (0.83-1.27) | 0.82 | 0.54                  | 0.97 (0.9-1.04)  | 0.39                       | 0.97 (0.72-1.30) | 0.83 | 0.99 |
| 2p24.1   | rs12710696 | 19320803  | G                | A                | 1.00 (0.96-1.05)      | 0.91                        | 1.16 (0.94-1.42) | 0.18 | 0.22                  | 0.98 (0.92-1.05) | 0.57                       | 1.05 (0.83-1.33) | 0.68 | 0.60 |
| 2q14.2   | rs4849887  | 121245122 | G                | A                | 1.01 (0.93-1.08)      | 0.86                        | 1.18 (0.87-1.62) | 0.29 | 0.35                  | 0.99 (0.88-1.1)  | 0.83                       | 0.9 (0.58-1.39)  | 0.63 | 0.70 |
| 2q31.1   | rs2016394  | 172972971 | G                | A                | 1.02 (0.97-1.07)      | 0.38                        | 0.95 (0.77-1.17) | 0.63 | 0.53                  | 0.98 (0.92-1.05) | 0.60                       | 1.01 (0.78-1.31) | 0.92 | 0.83 |
| 2q31.1   | rs1550623  | 174212894 | A                | G                | 0.98 (0.91-1.04)      | 0.47                        | 1.28 (0.97-1.67) | 0.08 | 0.07                  | 0.95 (0.87-1.04) | 0.29                       | 1.13 (0.86-1.5)  | 0.38 | 0.26 |
| 2q35     | rs13387042 | 217905832 | A                | G                | 0.99 (0.95-1.04)      | 0.79                        | 0.83 (0.68-1.01) | 0.06 | 0.09                  | 1.00 (0.94-1.07) | 0.97                       | 0.79 (0.63-1.01) | 0.06 | 0.09 |
| 2q35     | rs16857609 | 218296508 | G                | A                | 1.06 (1.01-1.12)      | 0.02                        | 0.92 (0.72-1.16) | 0.48 | 0.26                  | 1.00 (0.92-1.08) | 0.95                       | 0.85 (0.62-1.16) | 0.31 | 0.36 |
| 3p26.1   | rs6762644  | 4742276   | A                | G                | 1.02 (0.97-1.07)      | 0.51                        | 1.16 (0.93-1.44) | 0.18 | 0.27                  | 0.99 (0.92-1.06) | 0.74                       | 0.98 (0.74-1.3)  | 0.89 | 0.96 |
| 3p24.1   | rs4973768  | 27416013  | G                | A                | 1.02 (0.97-1.06)      | 0.49                        | 1.00 (0.84-1.20) | 1.00 | 0.88                  | 1.08 (1.01-1.15) | 0.03                       | 1.21 (0.93-1.56) | 0.16 | 0.44 |
| 3p24.1   | rs12493607 | 30682939  | C                | G                | 0.98 (0.94-1.03)      | 0.49                        | 1.15 (0.95-1.4)  | 0.15 | 0.14                  | 0.98 (0.91-1.06) | 0.64                       | 1.02 (0.78-1.34) | 0.86 | 0.78 |
| 4q24     | rs9790517  | 106084778 | G                | A                | 0.99 (0.94-1.04)      | 0.71                        | 0.95 (0.75-1.2)  | 0.65 | 0.74                  | 0.96 (0.88-1.04) | 0.33                       | 0.95 (0.7-1.29)  | 0.76 | 0.97 |
| 4q34.1   | rs6828523  | 175846426 | C                | A                | 1.04 (0.97-1.12)      | 0.28                        | 0.93 (0.67-1.29) | 0.67 | 0.53                  | 0.99 (0.89-1.1)  | 0.84                       | 0.91 (0.59-1.41) | 0.67 | 0.74 |
| 5p15.33  | rs10069690 | 1279790   | G                | A                | 1.24 (1.18-1.3)       | <b>3.4x10<sup>-17</sup></b> | 0.9 (0.71-1.13)  | 0.36 | 0.01                  | 1.12 (1.04-1.21) | <b>2.9x10<sup>-3</sup></b> | 1.03 (0.79-1.36) | 0.82 | 0.58 |
| 5p15.33  | rs7725218  | 1282414   | G                | A                | 1.09 (1.04-1.14)      | <b>3.5x10<sup>-4</sup></b>  | 1.01 (0.8-1.26)  | 0.96 | 0.51                  | 1.05 (0.98-1.13) | 0.18                       | 1.04 (0.79-1.36) | 0.80 | 0.93 |
| 5p15.33  | rs2736108  | 1297488   | G                | A                | 0.88 (0.83-0.92)      | <b>5.1x10<sup>-7</sup></b>  | 0.98 (0.79-1.22) | 0.85 | 0.37                  | 0.93 (0.86-1.00) | 0.05                       | 0.88 (0.66-1.16) | 0.35 | 0.72 |
| 5p12     | rs10941679 | 44706498  | A                | G                | 1.00 (0.94-1.05)      | 0.87                        | 0.89 (0.70-1.14) | 0.36 | 0.41                  | 1.07 (0.99-1.15) | 0.10                       | 1.08 (0.82-1.44) | 0.57 | 0.92 |
| 5q11.2   | rs889312   | 56031884  | A                | C                | 1.02 (0.97-1.07)      | 0.43                        | 0.94 (0.74-1.19) | 0.60 | 0.52                  | 1.00 (0.93-1.08) | 0.91                       | 1.35 (1.06-1.73) | 0.01 | 0.03 |
| 5q11.3   | rs10472076 | 58184061  | A                | G                | 1.00 (0.95-1.05)      | 0.94                        | 1.03 (0.85-1.26) | 0.73 | 0.74                  | 0.97 (0.90-1.04) | 0.35                       | 1.05 (0.81-1.37) | 0.71 | 0.58 |
| 5q11.3   | rs1353747  | 58337481  | A                | C                | 0.97 (0.9-1.04)       | 0.39                        | 1.02 (0.74-1.40) | 0.92 | 0.77                  | 0.99 (0.89-1.11) | 0.93                       | 0.68 (0.42-1.1)  | 0.12 | 0.15 |
| 5q33.3   | rs1432679  | 158244083 | A                | G                | 1.05 (1.01-1.1)       | 0.02                        | 0.92 (0.75-1.12) | 0.40 | 0.20                  | 0.97 (0.91-1.04) | 0.44                       | 1.09 (0.85-1.4)  | 0.50 | 0.43 |
| 6p25.3   | rs11242675 | 1318878   | A                | G                | 0.97 (0.92-1.02)      | 0.21                        | 0.88 (0.71-1.08) | 0.22 | 0.38                  | 0.97 (0.90-1.04) | 0.35                       | 1.17 (0.89-1.55) | 0.26 | 0.22 |

|          |                 |           |   |   |                  |                             |                  |      |      |                  |                             |                  |                            |                            |
|----------|-----------------|-----------|---|---|------------------|-----------------------------|------------------|------|------|------------------|-----------------------------|------------------|----------------------------|----------------------------|
| 6p24.3   | rs9348512       | 10456706  | C | A | 0.99 (0.94-1.03) | 0.57                        | 1.05 (0.84-1.31) | 0.68 | 0.62 | 0.84 (0.78-0.90) | <b>1.5x10<sup>-6</sup></b>  | 0.95 (0.75-1.2)  | 0.64                       | 0.39                       |
| 6p23     | rs204247        | 13722523  | A | G | 1.02 (0.97-1.06) | 0.49                        | 0.86 (0.71-1.04) | 0.11 | 0.10 | 1.11 (1.04-1.19) | <b>2.1x10<sup>-3</sup></b>  | 0.97 (0.75-1.26) | 0.83                       | 0.37                       |
| 6q14     | rs17530068      | 82193109  | A | G | 1.01 (0.96-1.07) | 0.57                        | 1.16 (0.92-1.46) | 0.20 | 0.29 | 1.12 (1.04-1.21) | <b>3.4x10<sup>-3</sup></b>  | 0.92 (0.68-1.25) | 0.58                       | 0.24                       |
| 6q25.1   | rs3757318       | 151914113 | G | A | 1.20 (1.11-1.3)  | <b>7.9x10<sup>-6</sup></b>  | 1.21 (0.87-1.68) | 0.26 | 0.96 | 1.19 (1.06-1.34) | <b>3.7x10<sup>-3</sup></b>  | 0.91 (0.56-1.47) | 0.70                       | 0.31                       |
| 6q25.1   | rs2046210       | 151948366 | G | A | 1.17 (1.11-1.22) | <b>1.5x10<sup>-10</sup></b> | 1.12 (0.91-1.38) | 0.29 | 0.71 | 1.09 (1.02-1.17) | 0.02                        | 0.85 (0.63-1.15) | 0.30                       | 0.15                       |
| 7q35     | rs720475        | 144074929 | G | A | 0.96 (0.91-1.01) | 0.12                        | 1.18 (0.93-1.50) | 0.17 | 0.11 | 0.91 (0.84-0.98) | 0.02                        | 1.45 (1.14-1.86) | <b>3.0x10<sup>-3</sup></b> | <b>9.3x10<sup>-4</sup></b> |
| 8p12     | rs9693444       | 29509616  | C | A | 1.00 (0.95-1.05) | 0.98                        | 1.04 (0.84-1.28) | 0.72 | 0.73 | 0.96 (0.90-1.03) | 0.31                        | 1.19 (0.93-1.54) | 0.17                       | 0.14                       |
| 8q21.11  | rs6472903       | 76230301  | A | C | 1.03 (0.97-1.1)  | 0.27                        | 0.82 (0.62-1.08) | 0.16 | 0.13 | 0.95 (0.86-1.04) | 0.28                        | 1.13 (0.8-1.59)  | 0.50                       | 0.38                       |
| 8q21.11  | rs2943559       | 76417937  | A | G | 1.08 (1-1.17)    | 0.05                        | 0.86 (0.57-1.29) | 0.46 | 0.29 | 1.06 (0.94-1.19) | 0.33                        | 1.28 (0.83-1.96) | 0.26                       | 0.45                       |
| 8q24.21  | rs11780156      | 129194641 | G | A | 0.95 (0.9-1.01)  | 0.09                        | 0.97 (0.75-1.26) | 0.83 | 0.88 | 0.93 (0.86-1.01) | 0.10                        | 1.21 (0.9-1.62)  | 0.21                       | 0.13                       |
| 8q24.21  | rs13281615      | 128355618 | A | G | 1.01 (0.97-1.06) | 0.51                        | 1.05 (0.87-1.26) | 0.62 | 0.76 | 1.04 (0.97-1.12) | 0.23                        | 1.08 (0.84-1.39) | 0.55                       | 0.80                       |
| 9p21.3   | rs1011970       | 22062134  | C | A | 1.04 (0.98-1.11) | 0.17                        | 0.82 (0.61-1.10) | 0.18 | 0.13 | 1.00 (0.91-1.09) | 0.94                        | 1.28 (0.97-1.71) | 0.09                       | 0.12                       |
| 9q31.2   | rs10759243      | 110306115 | C | A | 0.98 (0.93-1.03) | 0.34                        | 1.05 (0.86-1.29) | 0.63 | 0.51 | 1.02 (0.94-1.1)  | 0.67                        | 0.89 (0.66-1.19) | 0.42                       | 0.41                       |
| 9q31.2   | rs865686        | 110888478 | A | C | 1.00 (0.95-1.04) | 0.85                        | 0.91 (0.72-1.15) | 0.44 | 0.50 | 0.98 (0.91-1.05) | 0.59                        | 1.06 (0.8-1.41)  | 0.68                       | 0.62                       |
| 10p12.31 | rs7072776       | 22032942  | G | A | 0.97 (0.92-1.02) | 0.20                        | 1.15 (0.93-1.41) | 0.19 | 0.14 | 1.04 (0.97-1.12) | 0.22                        | 0.76 (0.59-0.98) | 0.03                       | 0.02                       |
| 10p12.31 | rs11814448      | 22315843  | A | C |                  |                             |                  |      |      |                  |                             |                  |                            |                            |
| 10q21.2  | rs10995190      | 64278682  | G | A | 0.99 (0.93-1.06) | 0.80                        | 0.99 (0.76-1.31) | 0.97 | 0.99 | 0.99 (0.9-1.08)  | 0.78                        | 0.66 (0.44-0.98) | 0.04                       | 0.07                       |
| 10q22.3  | rs704010        | 80841148  | G | A | 1.01 (0.97-1.06) | 0.53                        | 1.01 (0.81-1.25) | 0.95 | 0.95 | 0.99 (0.92-1.06) | 0.71                        | 1.08 (0.86-1.37) | 0.51                       | 0.49                       |
| 10q25.2  | rs7904519       | 114773927 | A | G | 1.09 (1.04-1.14) | <b>2.2x10<sup>-4</sup></b>  | 1.21 (1.00-1.46) | 0.05 | 0.33 | 1.05 (0.98-1.12) | 0.15                        | 0.91 (0.72-1.15) | 0.43                       | 0.28                       |
| 10q26.12 | rs2981579       | 123337335 | G | A | 0.99 (0.95-1.04) | 0.77                        | 1.05 (0.86-1.30) | 0.62 | 0.60 | 1.25 (1.17-1.34) | <b>1.9x10<sup>-10</sup></b> | 1.23 (0.94-1.59) | 0.13                       | 0.88                       |
| 10q26.12 | rs11199914      | 123093901 | G | A | 1.02 (0.97-1.07) | 0.53                        | 1.1 (0.88-1.38)  | 0.38 | 0.50 | 0.94 (0.87-1.01) | 0.08                        | 1.06 (0.8-1.41)  | 0.67                       | 0.42                       |
| 11p15.5  | rs3817198       | 1909006   | A | G | 1.09 (1.04-1.14) | <b>2.7x10<sup>-4</sup></b>  | 0.97 (0.80-1.19) | 0.79 | 0.30 | 1.16 (1.07-1.24) | <b>7.4x10<sup>-5</sup></b>  | 0.91 (0.69-1.19) | 0.49                       | 0.12                       |
| 11q13.1  | rs3903072       | 65583066  | C | A | 1.00 (0.96-1.05) | 0.86                        | 0.92 (0.76-1.11) | 0.38 | 0.39 | 1.00 (0.93-1.07) | 0.96                        | 0.95 (0.75-1.2)  | 0.67                       | 0.71                       |
| 11q13.3  | rs554219        | 69331642  | C | G | 1.06 (0.99-1.13) | 0.10                        | 0.87 (0.62-1.23) | 0.43 | 0.30 | 1.11 (1.01-1.22) | 0.04                        | 0.96 (0.68-1.38) | 0.84                       | 0.48                       |
| 11q13.3  | c11_pos69088342 | 69379161  | C | A | 1.05 (0.95-1.16) | 0.31                        | 0.98 (0.64-1.52) | 0.94 | 0.78 | 1.11 (0.97-1.27) | 0.14                        | 0.93 (0.56-1.54) | 0.77                       | 0.52                       |
| 11q13.3  | rs494406        | 69344241  | G | A | 1.02 (0.97-1.07) | 0.51                        | 1.10 (0.88-1.38) | 0.38 | 0.50 | 1.08 (1.00-1.16) | 0.04                        | 0.87 (0.66-1.14) | 0.31                       | 0.15                       |
| 11q24.3  | rs11820646      | 129461171 | G | A | 0.93 (0.89-0.98) | <b>4.7x10<sup>-3</sup></b>  | 0.85 (0.69-1.05) | 0.13 | 0.42 | 0.91 (0.85-0.98) | <b>7.7x10<sup>-3</sup></b>  | 0.95 (0.74-1.23) | 0.71                       | 0.75                       |
| 12p13.1  | rs12422552      | 14413931  | G | C | 1.02 (0.97-1.08) | 0.38                        | 0.90 (0.70-1.16) | 0.42 | 0.36 | 0.98 (0.91-1.06) | 0.65                        | 1.04 (0.76-1.42) | 0.81                       | 0.75                       |
| 12p11.22 | rs10771399      | 28155080  | A | G | 0.85 (0.79-0.91) | <b>1.5x10<sup>-5</sup></b>  | 0.81 (0.57-1.15) | 0.24 | 0.81 | 0.94 (0.84-1.04) | 0.23                        | 0.58 (0.36-0.93) | 0.02                       | 0.06                       |

|           |            |           |   |   |                  |                            |                  |      |      |                  |                             |                  |      |      |
|-----------|------------|-----------|---|---|------------------|----------------------------|------------------|------|------|------------------|-----------------------------|------------------|------|------|
| 12q22     | rs17356907 | 96027759  | A | G | 0.95 (0.9-0.99)  | 0.03                       | 0.95 (0.75-1.21) | 0.68 | 0.98 | 1.04 (0.97-1.12) | 0.30                        | 0.78 (0.59-1.03) | 0.08 | 0.07 |
| 12q24.21  | rs1292011  | 115836522 | A | G | 0.99 (0.94-1.04) | 0.66                       | 1.04 (0.85-1.28) | 0.68 | 0.64 | 0.91 (0.85-0.97) | <b>6.7x10<sup>-3</sup></b>  | 0.98 (0.75-1.27) | 0.88 | 0.61 |
| 13q13.1   | rs11571833 | 32972626  | T | A |                  |                            |                  |      |      |                  |                             |                  |      |      |
| 14q13.3   | rs2236007  | 37132769  | G | A | 0.99 (0.93-1.04) | 0.63                       | 0.82 (0.64-1.06) | 0.14 | 0.20 | 1.03 (0.95-1.12) | 0.50                        | 0.81 (0.57-1.13) | 0.21 | 0.20 |
| 14q24.1   | rs2588809  | 68660428  | G | A | 0.95 (0.89-1.01) | 0.08                       | 1.04 (0.81-1.34) | 0.75 | 0.50 | 0.96 (0.88-1.06) | 0.45                        | 1.27 (0.93-1.75) | 0.14 | 0.14 |
| 14q24.1   | rs999737   | 69034682  | G | A | 0.95 (0.9-1.01)  | 0.08                       | 1.00 (0.77-1.30) | 0.98 | 0.71 | 0.98 (0.91-1.07) | 0.71                        | 0.83 (0.6-1.14)  | 0.25 | 0.33 |
| 14q32.11  | rs941764   | 91841069  | A | G | 1.02 (0.97-1.07) | 0.44                       | 1.04 (0.82-1.31) | 0.76 | 0.89 | 1.00 (0.94-1.08) | 0.89                        | 1.12 (0.89-1.42) | 0.34 | 0.40 |
| 16q12.1_1 | rs3803662  | 52586341  | G | A | 1.05 (1-1.1)     | 0.07                       | 1.20 (0.98-1.49) | 0.08 | 0.23 | 1.25 (1.17-1.35) | <b>9.5x10<sup>-10</sup></b> | 1.08 (0.84-1.4)  | 0.53 | 0.32 |
| 16q12.1_2 | rs11075995 | 53855291  | A | T | 0.99 (0.94-1.05) | 0.84                       | 1.20 (0.98-1.47) | 0.08 | 0.10 | 0.98 (0.90-1.06) | 0.62                        | 1.27 (0.99-1.64) | 0.06 | 0.07 |
| 16q12.1_2 | rs17817449 | 53813367  | A | C | 0.96 (0.92-1.01) | 0.10                       | 0.82 (0.67-1.00) | 0.06 | 0.15 | 0.91 (0.84-0.97) | <b>6.0x10<sup>-3</sup></b>  | 1.23 (0.95-1.60) | 0.12 | 0.04 |
| 16q23.2   | rs13329835 | 80650805  | A | G | 1.04 (0.99-1.1)  | 0.13                       | 1.10 (0.87-1.4)  | 0.42 | 0.67 | 1.02 (0.95-1.10) | 0.60                        | 1.10 (0.85-1.43) | 0.45 | 0.59 |
| 17q22     | rs6504950  | 53056471  | G | A | 0.98 (0.93-1.04) | 0.55                       | 0.98 (0.78-1.24) | 0.89 | 1.00 | 1.02 (0.95-1.11) | 0.55                        | 1.19 (0.91-1.55) | 0.21 | 0.34 |
| 18q11.2   | rs527616   | 24337424  | C | G | 1 (0.96-1.05)    | 0.91                       | 0.87 (0.70-1.08) | 0.21 | 0.24 | 1.00 (0.93-1.07) | 0.97                        | 0.77 (0.59-0.99) | 0.05 | 0.07 |
| 18q11.2   | rs1436904  | 22824665  | A | C | 0.98 (0.94-1.03) | 0.44                       | 1.04 (0.85-1.28) | 0.69 | 0.60 | 0.97 (0.91-1.04) | 0.46                        | 0.89 (0.69-1.15) | 0.37 | 0.52 |
| 19p13.11  | rs8170     | 17389704  | G | A | 1.18 (1.11-1.25) | <b>3.7x10<sup>-8</sup></b> | 1.33 (1.05-1.68) | 0.02 | 0.34 | 0.99 (0.90-1.08) | 0.75                        | 0.81 (0.56-1.16) | 0.25 | 0.33 |
| 19p13.11  | rs4808801  | 18571141  | A | G | 1.00 (0.95-1.04) | 0.85                       | 0.82 (0.67-1.00) | 0.05 | 0.08 | 0.96 (0.89-1.03) | 0.27                        | 1.07 (0.83-1.38) | 0.61 | 0.46 |
| 19q13.31  | rs3760982  | 44286513  | G | A | 1.02 (0.97-1.07) | 0.44                       | 1.16 (0.93-1.43) | 0.19 | 0.29 | 1.05 (0.98-1.12) | 0.16                        | 1.07 (0.85-1.36) | 0.55 | 0.85 |
| 21q21.1   | rs2823093  | 16520832  | G | A | 0.97 (0.92-1.02) | 0.21                       | 0.79 (0.63-0.99) | 0.04 | 0.10 | 0.95 (0.88-1.03) | 0.24                        | 0.82 (0.6-1.13)  | 0.23 | 0.41 |
| 22q12.2   | rs132390   | 29621477  | A | G | 1.00 (0.88-1.13) | 0.97                       | 0.84 (0.47-1.50) | 0.55 | 0.58 | 1.08 (0.88-1.32) | 0.45                        | 1.71 (0.96-3.06) | 0.07 | 0.19 |
| 22q13.1   | rs6001930  | 40876234  | A | G | 1.08 (1.01-1.16) | 0.03                       | 0.95 (0.66-1.37) | 0.80 | 0.52 | 0.99 (0.88-1.12) | 0.91                        | 1.10 (0.72-1.67) | 0.65 | 0.67 |

# Reference and effect allele

**Table S6** Associations of 74 previously reported breast cancer susceptibility variants with breast cancer by tumor triple negative status in *BRCA1* and *BRCA2* mutation carriers. Associations with  $p < 0.01$  in bold.

| Locus    | SNP        | Position  | Ref <sup>#</sup> | Eff <sup>#</sup> | <i>BRCA1</i> carriers |                             |                     |                            |                            | <i>BRCA2</i> carriers |                            |                     |                            |                            |
|----------|------------|-----------|------------------|------------------|-----------------------|-----------------------------|---------------------|----------------------------|----------------------------|-----------------------|----------------------------|---------------------|----------------------------|----------------------------|
|          |            |           |                  |                  | triple negative       |                             | not triple negative |                            |                            | triple negative       |                            | not triple negative |                            |                            |
|          |            |           |                  |                  | HR (95%CI)            | p                           | HR (95%CI)          | p                          | p <sub>het</sub>           | HR (95%CI)            | p                          | HR (95%CI)          | p                          | p <sub>het</sub>           |
| 1p36.22  | rs616488   | 10566215  | A                | G                | 0.97 (0.91-1.04)      | 0.38                        | 0.94 (0.84-1.05)    | 0.26                       | 0.64                       | 1.02 (0.79-1.31)      | 0.90                       | 0.97 (0.9-1.05)     | 0.49                       | 0.77                       |
| 1p13.2   | rs12022378 | 114448389 | G                | A                | 1.01 (0.93-1.09)      | 0.89                        | 1.1 (0.96-1.27)     | 0.18                       | 0.35                       | 1.47 (1.1-1.97)       | <b>8.6x10<sup>-3</sup></b> | 0.98 (0.89-1.08)    | 0.72                       | 0.02                       |
| 1p11.2   | rs11249433 | 121280613 | A                | G                | 1.00 (0.94-1.06)      | 0.9                         | 0.99 (0.89-1.1)     | 0.82                       | 0.91                       | 1.08 (0.87-1.35)      | 0.47                       | 1.05 (0.98-1.13)    | 0.16                       | 0.80                       |
| 1q32.1_1 | rs6678914  | 202187176 | G                | A                | 0.97 (0.91-1.03)      | 0.29                        | 1.01 (0.92-1.12)    | 0.77                       | 0.50                       | 0.94 (0.75-1.18)      | 0.59                       | 1.08 (1.00-1.16)    | 0.04                       | 0.30                       |
| 1q32.1_2 | rs4245739  | 204518842 | A                | C                | 1.12 (1.06-1.20)      | <b>2.2x10<sup>-4</sup></b>  | 1.04 (0.93-1.16)    | 0.49                       | 0.29                       | 1.35 (1.06-1.71)      | 0.01                       | 0.91 (0.84-0.98)    | 0.02                       | <b>4.9x10<sup>-3</sup></b> |
| 2p24.1   | rs12710696 | 19320803  | G                | A                | 1.00 (0.95-1.07)      | 0.87                        | 1.04 (0.93-1.16)    | 0.46                       | 0.63                       | 1.1 (0.9-1.35)        | 0.35                       | 0.97 (0.90-1.04)    | 0.39                       | 0.28                       |
| 2q14.2   | rs4849887  | 121245122 | G                | A                | 1.03 (0.94-1.14)      | 0.50                        | 1 (0.84-1.19)       | 1.00                       | 0.78                       | 0.81 (0.52-1.26)      | 0.35                       | 1.01 (0.9-1.13)     | 0.92                       | 0.39                       |
| 2q31.1   | rs2016394  | 172972971 | G                | A                | 1.03 (0.97-1.09)      | 0.37                        | 0.98 (0.88-1.09)    | 0.70                       | 0.51                       | 1.05 (0.83-1.34)      | 0.68                       | 0.97 (0.91-1.05)    | 0.48                       | 0.59                       |
| 2q31.1   | rs1550623  | 174212894 | A                | G                | 1.03 (0.95-1.12)      | 0.42                        | 0.95 (0.81-1.11)    | 0.50                       | 0.40                       | 0.81 (0.6-1.08)       | 0.16                       | 1.00 (0.91-1.10)    | 0.94                       | 0.19                       |
| 2q35     | rs13387042 | 217905832 | A                | G                | 1.04 (0.99-1.11)      | 0.13                        | 0.84 (0.76-0.93)    | <b>1.0x10<sup>-3</sup></b> | <b>1.6x10<sup>-3</sup></b> | 0.99 (0.81-1.21)      | 0.92                       | 0.97 (0.90-1.03)    | 0.34                       | 0.85                       |
| 2q35     | rs16857609 | 218296508 | G                | A                | 1.03 (0.97-1.11)      | 0.33                        | 1.07 (0.95-1.21)    | 0.27                       | 0.68                       | 1.03 (0.79-1.35)      | 0.80                       | 0.97 (0.90-1.05)    | 0.43                       | 0.67                       |
| 3p26.1   | rs6762644  | 4742276   | A                | G                | 0.98 (0.92-1.05)      | 0.61                        | 1.16 (1.04-1.29)    | <b>7.8x10<sup>-3</sup></b> | 0.03                       | 0.93 (0.7-1.24)       | 0.62                       | 1.00 (0.92-1.08)    | 0.95                       | 0.68                       |
| 3p24.1   | rs4973768  | 27416013  | G                | A                | 1.00 (0.94-1.06)      | 0.94                        | 1.05 (0.95-1.15)    | 0.36                       | 0.46                       | 1.07 (0.86-1.34)      | 0.54                       | 1.10 (1.02-1.18)    | <b>0.01</b>                | 0.87                       |
| 3p24.1   | rs12493607 | 30682939  | C                | G                | 0.99 (0.93-1.05)      | 0.73                        | 1.01 (0.9-1.12)     | 0.92                       | 0.82                       | 1.2 (0.95-1.52)       | 0.12                       | 0.95 (0.88-1.03)    | 0.21                       | 0.09                       |
| 4q24     | rs9790517  | 106084778 | G                | A                | 0.96 (0.89-1.03)      | 0.22                        | 1.05 (0.93-1.19)    | 0.41                       | 0.25                       | 0.91 (0.69-1.2)       | 0.49                       | 0.97 (0.89-1.05)    | 0.46                       | 0.68                       |
| 4q34.1   | rs6828523  | 175846426 | C                | A                | 1.08 (0.98-1.18)      | 0.12                        | 0.92 (0.77-1.11)    | 0.38                       | 0.20                       | 1.02 (0.7-1.48)       | 0.93                       | 0.97 (0.86-1.09)    | 0.64                       | 0.84                       |
| 5p15.33  | rs10069690 | 1279790   | G                | A                | 1.27 (1.20-1.36)      | <b>5.2x10<sup>-14</sup></b> | 1.06 (0.94-1.19)    | 0.34                       | 0.02                       | 1.58 (1.26-1.99)      | <b>9.8x10<sup>-5</sup></b> | 1.04 (0.96-1.13)    | 0.37                       | <b>2.0x10<sup>-3</sup></b> |
| 5p15.33  | rs7725218  | 1282414   | G                | A                | 1.10 (1.03-1.17)      | <b>2.3x10<sup>-3</sup></b>  | 1.04 (0.93-1.16)    | 0.50                       | 0.45                       | 1.33 (1.03-1.7)       | 0.03                       | 1.00 (0.93-1.08)    | 0.90                       | 0.06                       |
| 5p15.33  | rs2736108  | 1297488   | G                | A                | 0.85 (0.80-0.91)      | <b>5.4x10<sup>-6</sup></b>  | 0.97 (0.87-1.1)     | 0.66                       | 0.10                       | 1.08 (0.84-1.39)      | 0.55                       | 0.89 (0.82-0.97)    | <b>5.2x10<sup>-3</sup></b> | 0.20                       |
| 5p12     | rs10941679 | 44706498  | A                | G                | 0.98 (0.92-1.05)      | 0.63                        | 1 (0.88-1.13)       | 0.99                       | 0.85                       | 0.98 (0.75-1.28)      | 0.89                       | 1.09 (1.00-1.18)    | 0.04                       | 0.51                       |
| 5q11.2   | rs889312   | 56031884  | A                | C                | 0.99 (0.92-1.06)      | 0.72                        | 1.08 (0.96-1.22)    | 0.21                       | 0.28                       | 0.84 (0.64-1.1)       | 0.21                       | 1.08 (1.00-1.17)    | 0.04                       | 0.10                       |
| 5q11.3   | rs10472076 | 58184061  | A                | G                | 1.00 (0.95-1.06)      | 0.92                        | 1.01 (0.91-1.12)    | 0.83                       | 0.90                       | 1.05 (0.82-1.35)      | 0.68                       | 0.96 (0.89-1.04)    | 0.33                       | 0.54                       |
| 5q11.3   | rs1353747  | 58337481  | A                | C                | 0.92 (0.83-1.02)      | 0.12                        | 1.1 (0.93-1.29)     | 0.28                       | 0.13                       | 1.15 (0.79-1.66)      | 0.48                       | 0.92 (0.81-1.04)    | 0.20                       | 0.33                       |
| 5q33.3   | rs1432679  | 158244083 | A                | G                | 1.05 (0.99-1.12)      | 0.09                        | 1.03 (0.93-1.15)    | 0.53                       | 0.79                       | 0.82 (0.67-1.01)      | 0.07                       | 1.02 (0.95-1.09)    | 0.57                       | 0.07                       |
| 6p25.3   | rs11242675 | 1318878   | A                | G                | 0.93 (0.87-0.99)      | 0.02                        | 1.04 (0.93-1.16)    | 0.50                       | 0.13                       | 1.04 (0.81-1.34)      | 0.73                       | 0.98 (0.91-1.06)    | 0.62                       | 0.67                       |

|          |                     |           |   |   |                  |                             |                  |                            |                            |                  |      |                  |                             |                            |
|----------|---------------------|-----------|---|---|------------------|-----------------------------|------------------|----------------------------|----------------------------|------------------|------|------------------|-----------------------------|----------------------------|
| 6p24.3   | rs9348512           | 10456706  | C | A | 0.99 (0.92-1.05) | 0.65                        | 1.01 (0.9-1.13)  | 0.84                       | 0.73                       | 0.79 (0.62-1)    | 0.05 | 0.87 (0.81-0.93) | <b>1.0x10<sup>-4</sup></b>  | 0.48                       |
| 6p23     | rs204247            | 13722523  | A | G | 0.99 (0.94-1.05) | 0.78                        | 1.02 (0.92-1.13) | 0.70                       | 0.67                       | 1.06 (0.82-1.36) | 0.67 | 1.1 (1.02-1.18)  | <b>7.8x10<sup>-3</sup></b>  | 0.79                       |
| 6q14     | rs17530068          | 82193109  | A | G | 1.02 (0.96-1.09) | 0.48                        | 1.04 (0.92-1.17) | 0.56                       | 0.89                       | 1.19 (0.9-1.57)  | 0.23 | 1.08 (0.99-1.17) | 0.07                        | 0.56                       |
| 6q25.1   | rs3757318           | 151914113 | G | A | 1.23 (1.11-1.36) | <b>6.7x10<sup>-5</sup></b>  | 1.14 (0.94-1.37) | 0.18                       | 0.53                       | 1.51 (1.07-2.14) | 0.02 | 1.09 (0.96-1.25) | 0.17                        | 0.12                       |
| 6q25.1   | rs2046210           | 151948366 | G | A | 1.23 (1.16-1.31) | <b>5.5x10<sup>-12</sup></b> | 1.01 (0.91-1.13) | 0.79                       | <b>6.8x10<sup>-3</sup></b> | 1.32 (1.03-1.7)  | 0.03 | 1.02 (0.94-1.10) | 0.69                        | 0.08                       |
| 7q35     | rs720475            | 144074929 | G | A | 0.97 (0.90-1.04) | 0.35                        | 1.01 (0.88-1.15) | 0.92                       | 0.64                       | 0.87 (0.66-1.14) | 0.30 | 0.99 (0.91-1.07) | 0.74                        | 0.40                       |
| 8p12     | rs9693444           | 29509616  | C | A | 1.04 (0.98-1.11) | 0.20                        | 0.93 (0.83-1.03) | 0.18                       | 0.12                       | 0.87 (0.68-1.12) | 0.29 | 1.01 (0.94-1.09) | 0.73                        | 0.31                       |
| 8q21.11  | rs6472903           | 76230301  | A | C | 1.06 (0.98-1.15) | 0.12                        | 0.88 (0.76-1.02) | 0.10                       | 0.06                       | 1.01 (0.72-1.41) | 0.95 | 0.96 (0.87-1.06) | 0.45                        | 0.80                       |
| 8q21.11  | rs2943559           | 76417937  | A | G | 1.07 (0.97-1.19) | 0.18                        | 1.02 (0.84-1.24) | 0.85                       | 0.69                       | 1.23 (0.82-1.82) | 0.31 | 1.06 (0.94-1.20) | 0.32                        | 0.54                       |
| 8q24.21  | rs11780156          | 129194641 | G | A | 0.93 (0.86-.001) | 0.06                        | 0.99 (0.87-1.12) | 0.86                       | 0.49                       | 1.07 (0.8-1.42)  | 0.66 | 0.95 (0.87-1.04) | 0.24                        | 0.49                       |
| 8q24.21  | rs13281615          | 128355618 | A | G | 0.99 (0.93-1.05) | 0.70                        | 1.08 (0.97-1.2)  | 0.14                       | 0.20                       | 1.08 (0.86-1.35) | 0.53 | 1.04 (0.97-1.12) | 0.26                        | 0.80                       |
| 9p21.3   | rs1011970           | 22062134  | C | A | 1.09 (1.01-1.18) | 0.02                        | 0.87 (0.74-1.01) | 0.06                       | 0.02                       | 0.95 (0.71-1.28) | 0.76 | 1.04 (0.95-1.15) | 0.35                        | 0.59                       |
| 9q31.2   | rs10759243          | 110306115 | C | A | 0.98 (0.92-1.05) | 0.58                        | 0.99 (0.88-1.1)  | 0.82                       | 0.95                       | 0.88 (0.67-1.16) | 0.35 | 1.02 (0.95-1.10) | 0.58                        | 0.34                       |
| 9q31.2   | rs865686            | 110888478 | A | C | 1.00 (0.94-1.07) | 0.99                        | 0.98 (0.87-1.1)  | 0.72                       | 0.79                       | 1.21 (0.94-1.55) | 0.14 | 0.95 (0.89-1.03) | 0.23                        | 0.11                       |
| 10p12.31 | rs7072776           | 22032942  | G | A | 0.93 (0.87-0.99) | 0.03                        | 1.13 (1.01-1.26) | 0.03                       | <b>7.9x10<sup>-3</sup></b> | 0.82 (0.65-1.03) | 0.09 | 1.04 (0.97-1.12) | 0.27                        | 0.07                       |
| 10p12.31 | rs11814448          | 22315843  | A | C |                  |                             |                  |                            |                            |                  |      |                  |                             |                            |
| 10q21.2  | rs10995190          | 64278682  | G | A | 1.04 (0.96-1.12) | 0.34                        | 0.87 (0.75-1.02) | 0.09                       | 0.09                       | 0.86 (0.61-1.21) | 0.38 | 0.96 (0.87-1.06) | 0.40                        | 0.57                       |
| 10q22.3  | rs704010            | 80841148  | G | A | 0.98 (0.92-1.04) | 0.47                        | 1.11 (1-1.24)    | 0.06                       | 0.09                       | 0.92 (0.75-1.12) | 0.42 | 1.01 (0.95-1.08) | 0.71                        | 0.41                       |
| 10q25.2  | rs7904519           | 114773927 | A | G | 1.08 (1.02-1.15) | <b>6.9x10<sup>-3</sup></b>  | 1.13 (1.03-1.25) | 0.01                       | 0.49                       | 1.05 (0.83-1.34) | 0.66 | 1.03 (0.96-1.10) | 0.46                        | 0.85                       |
| 10q26.12 | rs2981579           | 123337335 | G | A | 0.92 (0.87-0.98) | <b>8.9x10<sup>-3</sup></b>  | 1.18 (1.06-1.32) | <b>2.1x10<sup>-3</sup></b> | <b>6.4x10<sup>-4</sup></b> | 0.86 (0.7-1.05)  | 0.15 | 1.33 (1.24-1.43) | <b>3.8x10<sup>-16</sup></b> | <b>1.7x10<sup>-4</sup></b> |
| 10q26.12 | rs11199914          | 123093901 | G | A | 1.02 (0.96-1.09) | 0.45                        | 1.02 (0.91-1.15) | 0.70                       | 0.98                       | 0.93 (0.71-1.21) | 0.58 | 0.96 (0.89-1.03) | 0.24                        | 0.85                       |
| 11p15.5  | rs3817198           | 1909006   | A | G | 1.07 (1.01-1.14) | 0.03                        | 1.09 (0.98-1.22) | 0.11                       | 0.80                       | 1.09 (0.85-1.4)  | 0.50 | 1.13 (1.05-1.21) | <b>1.7x10<sup>-3</sup></b>  | 0.82                       |
| 11q13.1  | rs3903072           | 65583066  | C | A | 1.01 (0.95-1.07) | 0.77                        | 0.96 (0.86-1.06) | 0.39                       | 0.44                       | 0.93 (0.75-1.14) | 0.46 | 1.00 (0.94-1.07) | 0.90                        | 0.49                       |
| 11q13.3  | rs554219            | 69331642  | C | G | 1.01 (0.92-1.10) | 0.87                        | 1.09 (0.93-1.27) | 0.30                       | 0.49                       | 0.82 (0.57-1.18) | 0.29 | 1.14 (1.03-1.25) | <b>8.4x10<sup>-3</sup></b>  | 0.11                       |
| 11q13.3  | c11_pos690<br>88342 | 69379161  | C | A | 1.02 (0.89-1.17) | 0.76                        | 1.07 (0.84-1.35) | 0.58                       | 0.78                       | 0.76 (0.45-1.29) | 0.31 | 1.14 (1.00-1.31) | 0.06                        | 0.17                       |
| 11q13.3  | rs494406            | 69344241  | G | A | 1.02 (0.95-1.09) | 0.63                        | 1.03 (0.91-1.15) | 0.67                       | 0.91                       | 1.01 (0.8-1.28)  | 0.93 | 1.06 (0.98-1.14) | 0.14                        | 0.73                       |
| 11q24.3  | rs11820646          | 129461171 | G | A | 0.93 (0.88-0.99) | 0.03                        | 0.92 (0.82-1.02) | 0.12                       | 0.78                       | 0.78 (0.61-0.99) | 0.04 | 0.94 (0.88-1.01) | 0.10                        | 0.17                       |
| 12p13.1  | rs12422552          | 14413931  | G | C | 1.02 (0.95-1.09) | 0.55                        | 0.99 (0.88-1.13) | 0.93                       | 0.76                       | 1.16 (0.87-1.55) | 0.30 | 0.96 (0.88-1.04) | 0.33                        | 0.25                       |
| 12p11.22 | rs10771399          | 28155080  | A | G | 0.86 (0.78-0.95) | <b>3.3x10<sup>-3</sup></b>  | 0.82 (0.68-0.99) | 0.03                       | 0.69                       | 0.75 (0.51-1.1)  | 0.14 | 0.92 (0.82-1.02) | 0.13                        | 0.36                       |



|           |            |           |   |   |                  |                            |                  |                            |                            |                  |      |                  |                            |      |
|-----------|------------|-----------|---|---|------------------|----------------------------|------------------|----------------------------|----------------------------|------------------|------|------------------|----------------------------|------|
| 12q22     | rs17356907 | 96027759  | A | G | 0.94 (0.88-1.00) | 0.05                       | 0.99 (0.88-1.11) | 0.83                       | 0.51                       | 0.91 (0.72-1.14) | 0.41 | 1.02 (0.95-1.10) | 0.58                       | 0.38 |
| 12q24.21  | rs1292011  | 115836522 | A | G | 1.06 (1.00-1.13) | 0.05                       | 0.88 (0.79-0.98) | 0.02                       | <b>9.1x10<sup>-3</sup></b> | 1.03 (0.82-1.3)  | 0.80 | 0.90 (0.84-0.97) | <b>3.4x10<sup>-3</sup></b> | 0.31 |
| 13q13.1   | rs11571833 | 32972626  | T | A |                  |                            |                  |                            |                            |                  |      |                  |                            |      |
| 14q13.3   | rs2236007  | 37132769  | G | A | 0.96 (0.89-1.03) | 0.30                       | 0.98 (0.86-1.11) | 0.73                       | 0.85                       | 1.31 (0.98-1.75) | 0.07 | 0.95 (0.87-1.04) | 0.27                       | 0.06 |
| 14q24.1   | rs2588809  | 68660428  | G | A | 0.94 (0.87-1.02) | 0.13                       | 0.99 (0.87-1.14) | 0.93                       | 0.55                       | 1.01 (0.74-1.39) | 0.93 | 1.00 (0.91-1.10) | 1.00                       | 0.94 |
| 14q24.1   | rs999737   | 69034682  | G | A | 1.01 (0.94-1.09) | 0.77                       | 0.84 (0.74-0.97) | 0.02                       | 0.05                       | 1.03 (0.8-1.32)  | 0.84 | 0.95 (0.88-1.03) | 0.26                       | 0.61 |
| 14q32.11  | rs941764   | 91841069  | A | G | 1.00 (0.93-1.07) | 0.96                       | 1.09 (0.96-1.22) | 0.18                       | 0.31                       | 0.96 (0.78-1.18) | 0.72 | 1.03 (0.96-1.11) | 0.42                       | 0.57 |
| 16q12.1_1 | rs3803662  | 52586341  | G | A | 0.98 (0.92-1.05) | 0.59                       | 1.25 (1.12-1.39) | <b>1.1x10<sup>-4</sup></b> | <b>1.7x10<sup>-3</sup></b> | 1.17 (0.93-1.48) | 0.18 | 1.24 (1.15-1.34) | <b>1.0x10<sup>-8</sup></b> | 0.67 |
| 16q12.1_2 | rs11075995 | 53855291  | A | T | 0.98 (0.92-1.05) | 0.66                       | 1.07 (0.95-1.21) | 0.24                       | 0.28                       | 1.18 (0.91-1.52) | 0.22 | 0.99 (0.91-1.07) | 0.76                       | 0.24 |
| 16q12.1_2 | rs17817449 | 53813367  | A | C | 0.95 (0.89-1.00) | 0.07                       | 0.96 (0.86-1.06) | 0.41                       | 0.90                       | 1.02 (0.79-1.31) | 0.90 | 0.93 (0.86-1.00) | 0.05                       | 0.55 |
| 16q23.2   | rs13329835 | 80650805  | A | G | 1.03 (0.96-1.10) | 0.47                       | 1.09 (0.96-1.24) | 0.17                       | 0.47                       | 1.16 (0.92-1.46) | 0.21 | 1.01 (0.93-1.09) | 0.82                       | 0.30 |
| 17q22     | rs6504950  | 53056471  | G | A | 1.00 (0.94-1.07) | 0.94                       | 0.95 (0.85-1.07) | 0.43                       | 0.53                       | 1.05 (0.83-1.32) | 0.70 | 1.04 (0.97-1.12) | 0.28                       | 0.98 |
| 18q11.2   | rs527616   | 24337424  | C | G | 0.98 (0.92-1.04) | 0.47                       | 1.01 (0.91-1.13) | 0.82                       | 0.63                       | 0.97 (0.77-1.22) | 0.81 | 0.97 (0.90-1.04) | 0.35                       | 0.96 |
| 18q11.2   | rs1436904  | 22824665  | A | C | 0.98 (0.93-1.04) | 0.57                       | 1 (0.9-1.11)     | 0.95                       | 0.78                       | 0.96 (0.77-1.2)  | 0.73 | 0.96 (0.90-1.03) | 0.31                       | 0.98 |
| 19p13.11  | rs8170     | 17389704  | G | A | 1.15 (1.07-1.24) | <b>1.6x10<sup>-4</sup></b> | 1.26 (1.12-1.43) | <b>1.6x10<sup>-4</sup></b> | 0.26                       | 0.89 (0.65-1.22) | 0.47 | 0.97 (0.89-1.07) | 0.58                       | 0.62 |
| 19p13.11  | rs4808801  | 18571141  | A | G | 0.99 (0.93-1.05) | 0.66                       | 0.97 (0.87-1.07) | 0.53                       | 0.77                       | 1.01 (0.8-1.28)  | 0.94 | 0.97 (0.90-1.04) | 0.38                       | 0.75 |
| 19q13.31  | rs3760982  | 44286513  | G | A | 1.04 (0.98-1.11) | 0.18                       | 1.02 (0.91-1.14) | 0.74                       | 0.75                       | 0.87 (0.71-1.08) | 0.21 | 1.09 (1.02-1.16) | 0.02                       | 0.07 |
| 21q21.1   | rs2823093  | 16520832  | G | A | 0.98 (0.91-1.04) | 0.45                       | 0.9 (0.8-1.01)   | 0.08                       | 0.31                       | 0.99 (0.76-1.3)  | 0.96 | 0.93 (0.85-1.01) | 0.07                       | 0.66 |
| 22q12.2   | rs132390   | 29621477  | A | G | 0.97 (0.82-1.14) | 0.72                       | 1.02 (0.77-1.34) | 0.91                       | 0.80                       | 0.68 (0.31-1.48) | 0.33 | 1.24 (1.05-1.48) | 0.01                       | 0.16 |
| 22q13.1   | rs6001930  | 40876234  | A | G | 1.05 (0.95-1.16) | 0.32                       | 1.11 (0.94-1.32) | 0.23                       | 0.63                       | 0.77 (0.51-1.14) | 0.19 | 1.05 (0.94-1.17) | 0.37                       | 0.16 |

# Reference and effect allele

**Table S7** Associations of 74 previously reported breast cancer susceptibility variants with ductal breast in *BRCA1* and *BRCA2* mutation carriers. Associations with  $p < 0.01$  in bold.

| Locus    | SNP        | Position  | Ref <sup>#</sup> | Eff <sup>#</sup> | <i>BRCA1</i> carriers |                             |                            | <i>BRCA2</i> carriers |                            |                            |
|----------|------------|-----------|------------------|------------------|-----------------------|-----------------------------|----------------------------|-----------------------|----------------------------|----------------------------|
|          |            |           |                  |                  | HR (95%CI)            | p                           | P <sub>het</sub>           | HR (95%CI)            | p                          | P <sub>het</sub>           |
| 1p36.22  | rs616488   | 10566215  | A                | G                | 0.94 (0.89-0.99)      | 0.02                        | 0.08                       | 0.98 (0.91-1.05)      | 0.57                       | 0.98                       |
| 1p13.2   | rs12022378 | 114448389 | G                | A                | 1.00 (0.94-1.07)      | 0.94                        | 0.05                       | 1.09 (0.99-1.19)      | 0.07                       | 0.09                       |
| 1p11.2   | rs11249433 | 121280613 | A                | G                | 1.03 (0.98-1.08)      | 0.20                        | <b>2.1x10<sup>-3</sup></b> | 1.06 (0.99-1.13)      | 0.08                       | 0.77                       |
| 1q32.1_1 | rs6678914  | 202187176 | G                | A                | 0.99 (0.94-1.04)      | 0.60                        | 0.70                       | 1.03 (0.97-1.10)      | 0.31                       | 0.21                       |
| 1q32.1_2 | rs4245739  | 204518842 | A                | C                | 1.09 (1.04-1.15)      | <b>8.1x10<sup>-4</sup></b>  | 0.73                       | 1.00 (0.93-1.08)      | 0.94                       | 0.04                       |
| 2p24.1   | rs12710696 | 19320803  | G                | A                | 1.04 (0.99-1.09)      | 0.10                        | 0.05                       | 1.04 (0.97-1.11)      | 0.27                       | <b>2.4x10<sup>-3</sup></b> |
| 2q14.2   | rs4849887  | 121245122 | G                | A                | 1.03 (0.95-1.11)      | 0.47                        | 0.80                       | 0.92 (0.82-1.03)      | 0.14                       | 0.03                       |
| 2q31.1   | rs2016394  | 172972971 | G                | A                | 1.02 (0.97-1.07)      | 0.50                        | 0.76                       | 1.01 (0.94-1.08)      | 0.83                       | 0.18                       |
| 2q31.1   | rs1550623  | 174212894 | A                | G                | 0.99 (0.93-1.06)      | 0.78                        | 0.30                       | 0.99 (0.90-1.09)      | 0.83                       | 0.42                       |
| 2q35     | rs13387042 | 217905832 | A                | G                | 0.97 (0.92-1.01)      | 0.17                        | 0.28                       | 0.97 (0.91-1.03)      | 0.31                       | 0.79                       |
| 2q35     | rs16857609 | 218296508 | G                | A                | 1.05 (1.00-1.11)      | 0.05                        | 0.58                       | 0.97 (0.9-1.05)       | 0.45                       | 0.69                       |
| 3p26.1   | rs6762644  | 4742276   | A                | G                | 1.01 (0.96-1.06)      | 0.77                        | 0.03                       | 0.98 (0.91-1.05)      | 0.55                       | 0.61                       |
| 3p24.1   | rs4973768  | 27416013  | G                | A                | 1.03 (0.98-1.07)      | 0.28                        | 0.25                       | 1.12 (1.05-1.20)      | <b>9.4x10<sup>-4</sup></b> | 0.13                       |
| 3p24.1   | rs12493607 | 30682939  | C                | G                | 1.00 (0.95-1.05)      | 0.85                        | 0.94                       | 0.98 (0.91-1.05)      | 0.58                       | 0.62                       |
| 4q24     | rs9790517  | 106084778 | G                | A                | 0.99 (0.94-1.05)      | 0.74                        | 0.71                       | 0.97 (0.90-1.05)      | 0.48                       | 0.50                       |
| 4q34.1   | rs6828523  | 175846426 | C                | A                | 1.00 (0.92-1.08)      | 0.97                        | 0.12                       | 0.93 (0.84-1.04)      | 0.22                       | 0.06                       |
| 5p15.33  | rs10069690 | 1279790   | G                | A                | 1.20 (1.14-1.26)      | <b>2.0x10<sup>-11</sup></b> | 0.67                       | 1.12 (1.04-1.21)      | <b>2.4x10<sup>-3</sup></b> | 0.56                       |
| 5p15.33  | rs7725218  | 1282414   | G                | A                | 1.09 (1.04-1.15)      | <b>4.6x10<sup>-4</sup></b>  | 0.49                       | 1.05 (0.98-1.13)      | 0.15                       | 0.84                       |
| 5p15.33  | rs2736108  | 1297488   | G                | A                | 0.90 (0.86-0.95)      | <b>1.4x10<sup>-4</sup></b>  | 0.26                       | 0.89 (0.83-0.96)      | <b>2.7x10<sup>-3</sup></b> | 0.10                       |
| 5p12     | rs10941679 | 44706498  | A                | G                | 0.98 (0.93-1.04)      | 0.56                        | 0.76                       | 1.07 (0.99-1.16)      | 0.07                       | 0.91                       |
| 5q11.2   | rs889312   | 56031884  | A                | C                | 1.03 (0.98-1.09)      | 0.22                        | 0.18                       | 1.07 (0.99-1.15)      | 0.08                       | 0.21                       |
| 5q11.3   | rs10472076 | 58184061  | A                | G                | 0.99 (0.94-1.04)      | 0.73                        | 0.23                       | 1.00 (0.93-1.07)      | 0.91                       | 0.24                       |
| 5q11.3   | rs1353747  | 58337481  | A                | C                | 1.00 (0.92-1.08)      | 0.97                        | 0.22                       | 0.99 (0.89-1.11)      | 0.93                       | 0.11                       |
| 5q33.3   | rs1432679  | 158244083 | A                | G                | 1.07 (1.02-1.12)      | <b>3.8x10<sup>-3</sup></b>  | 0.04                       | 1.01 (0.94-1.08)      | 0.81                       | 0.19                       |
| 6p25.3   | rs11242675 | 1318878   | A                | G                | 0.91 (0.86-0.96)      | <b>3.4x10<sup>-4</sup></b>  | <b>3.5x10<sup>-5</sup></b> | 0.98 (0.92-1.05)      | 0.65                       | 0.71                       |
| 6p24.3   | rs9348512  | 10456706  | C                | A                | 1.00 (0.95-1.05)      | 0.85                        | 0.88                       | 0.86 (0.80-0.92)      | <b>2.0x10<sup>-5</sup></b> | 0.68                       |

|          |                     |           |   |   |                  |                             |      |                  |                             |      |
|----------|---------------------|-----------|---|---|------------------|-----------------------------|------|------------------|-----------------------------|------|
| 6p23     | rs204247            | 13722523  | A | G | 0.99 (0.94-1.04) | 0.62                        | 0.29 | 1.11 (1.04-1.19) | <b>1.6x10<sup>-3</sup></b>  | 0.35 |
| 6q14     | rs17530068          | 82193109  | A | G | 1.01 (0.95-1.06) | 0.78                        | 0.15 | 1.10 (1.02-1.18) | 0.02                        | 0.98 |
| 6q25.1   | rs3757318           | 151914113 | G | A | 1.17 (1.08-1.28) | <b>2.3x10<sup>-4</sup></b>  | 0.29 | 1.09 (0.96-1.23) | 0.17                        | 0.04 |
| 6q25.1   | rs2046210           | 151948366 | G | A | 1.17 (1.11-1.22) | <b>9.4x10<sup>-10</sup></b> | 0.91 | 1.05 (0.98-1.13) | 0.14                        | 0.79 |
| 7q35     | rs720475            | 144074929 | G | A | 0.99 (0.93-1.04) | 0.66                        | 0.49 | 0.98 (0.91-1.05) | 0.57                        | 0.56 |
| 8p12     | rs9693444           | 29509616  | C | A | 1.01 (0.96-1.06) | 0.66                        | 0.63 | 1.01 (0.94-1.08) | 0.74                        | 0.20 |
| 8q21.11  | rs6472903           | 76230301  | A | C | 0.99 (0.93-1.05) | 0.73                        | 0.23 | 0.93 (0.85-1.02) | 0.15                        | 0.10 |
| 8q21.11  | rs2943559           | 76417937  | A | G | 1.05 (0.96-1.14) | 0.29                        | 0.66 | 1.04 (0.93-1.17) | 0.49                        | 0.13 |
| 8q24.21  | rs11780156          | 129194641 | G | A | 0.96 (0.90-1.01) | 0.14                        | 0.61 | 1.01 (0.93-1.09) | 0.87                        | 0.03 |
| 8q24.21  | rs13281615          | 128355618 | A | G | 1.03 (0.98-1.08) | 0.23                        | 0.23 | 1.05 (0.98-1.12) | 0.16                        | 0.95 |
| 9p21.3   | rs1011970           | 22062134  | C | A | 1.00 (0.93-1.07) | 0.96                        | 0.17 | 1.03 (0.94-1.12) | 0.53                        | 0.92 |
| 9q31.2   | rs10759243          | 110306115 | C | A | 1.01 (0.96-1.06) | 0.75                        | 0.05 | 1.00 (0.93-1.07) | 0.98                        | 0.97 |
| 9q31.2   | rs865686            | 110888478 | A | C | 0.98 (0.93-1.03) | 0.46                        | 0.36 | 1.00 (0.94-1.08) | 0.89                        | 0.39 |
| 10p12.31 | rs7072776           | 22032942  | G | A | 1.00 (0.95-1.05) | 0.97                        | 0.32 | 0.98 (0.91-1.06) | 0.63                        | 0.16 |
| 10p12.31 | rs11814448          | 22315843  | A | C |                  |                             |      |                  |                             |      |
| 10q21.2  | rs10995190          | 64278682  | G | A | 0.98 (0.92-1.05) | 0.53                        | 0.57 | 0.95 (0.87-1.04) | 0.28                        | 0.73 |
| 10q22.3  | rs704010            | 80841148  | G | A | 1.02 (0.97-1.07) | 0.45                        | 0.84 | 1.01 (0.94-1.07) | 0.87                        | 0.65 |
| 10q25.2  | rs7904519           | 114773927 | A | G | 1.09 (1.04-1.14) | <b>4.0x10<sup>-4</sup></b>  | 0.44 | 1.04 (0.97-1.11) | 0.24                        | 0.60 |
| 10q26.12 | rs2981579           | 123337335 | G | A | 1.00 (0.95-1.04) | 0.89                        | 0.93 | 1.26 (1.18-1.35) | <b>5.1x10<sup>-12</sup></b> | 0.40 |
| 10q26.12 | rs11199914          | 123093901 | G | A | 1.02 (0.97-1.07) | 0.49                        | 0.66 | 0.95 (0.88-1.02) | 0.14                        | 0.87 |
| 11p15.5  | rs3817198           | 1909006   | A | G | 1.07 (1.02-1.13) | <b>6.2x10<sup>-3</sup></b>  | 0.71 | 1.14 (1.06-1.22) | <b>4.1x10<sup>-4</sup></b>  | 0.49 |
| 11q13.1  | rs3903072           | 65583066  | C | A | 0.98 (0.93-1.03) | 0.36                        | 0.22 | 1.01 (0.94-1.08) | 0.79                        | 0.29 |
| 11q13.3  | rs554219            | 69331642  | C | G | 1.03 (0.96-1.11) | 0.43                        | 0.90 | 1.10 (1.00-1.21) | 0.06                        | 0.81 |
| 11q13.3  | c11_pos6908<br>8342 | 69379161  | C | A | 1.02 (0.92-1.13) | 0.71                        | 0.57 | 1.09 (0.95-1.25) | 0.24                        | 0.97 |
| 11q13.3  | rs494406            | 69344241  | G | A | 1.05 (0.99-1.10) | 0.11                        | 0.06 | 1.06 (0.98-1.14) | 0.15                        | 0.84 |
| 11q24.3  | rs11820646          | 129461171 | G | A | 0.92 (0.88-0.97) | <b>1.2x10<sup>-3</sup></b>  | 0.52 | 0.91 (0.85-0.97) | <b>4.6x10<sup>-3</sup></b>  | 0.62 |
| 12p13.1  | rs12422552          | 14413931  | G | C | 1.01 (0.96-1.07) | 0.66                        | 0.97 | 0.95 (0.89-1.03) | 0.22                        | 0.05 |
| 12p11.22 | rs10771399          | 28155080  | A | G | 0.83 (0.76-0.90) | <b>2.7x10<sup>-6</sup></b>  | 0.19 | 0.86 (0.77-0.95) | <b>5.2x10<sup>-3</sup></b>  | 0.13 |
| 12q22    | rs17356907          | 96027759  | A | G | 0.96 (0.91-1.01) | 0.14                        | 0.40 | 0.98 (0.92-1.06) | 0.66                        | 0.25 |

|           |            |           |   |   |                  |                            |      |                  |                            |      |
|-----------|------------|-----------|---|---|------------------|----------------------------|------|------------------|----------------------------|------|
| 12q24.21  | rs1292011  | 115836522 | A | G | 1.00 (0.95-1.05) | 0.96                       | 0.94 | 0.93 (0.87-1.00) | 0.04                       | 0.35 |
| 13q13.1   | rs11571833 | 32972626  | T | A |                  |                            |      |                  |                            |      |
| 14q13.3   | rs2236007  | 37132769  | G | A | 0.97 (0.92-1.03) | 0.36                       | 0.64 | 0.98 (0.90-1.06) | 0.57                       | 0.24 |
| 14q24.1   | rs2588809  | 68660428  | G | A | 0.95 (0.89-1.01) | 0.10                       | 0.55 | 1.03 (0.95-1.12) | 0.52                       | 0.24 |
| 14q24.1   | rs999737   | 69034682  | G | A | 0.97 (0.91-1.02) | 0.26                       | 0.57 | 0.97 (0.89-1.05) | 0.40                       | 0.87 |
| 14q32.11  | rs941764   | 91841069  | A | G | 1.04 (0.99-1.10) | 0.10                       | 0.17 | 1.04 (0.97-1.12) | 0.24                       | 0.18 |
| 16q12.1_1 | rs3803662  | 52586341  | G | A | 1.06 (1.01-1.12) | 0.02                       | 0.79 | 1.21 (1.13-1.29) | <b>1.3x10<sup>-7</sup></b> | 0.24 |
| 16q12.1_2 | rs11075995 | 53855291  | A | T | 1.02 (0.96-1.07) | 0.58                       | 0.73 | 1.02 (0.94-1.10) | 0.70                       | 0.95 |
| 16q12.1_2 | rs17817449 | 53813367  | A | C | 0.96 (0.92-1.01) | 0.14                       | 0.17 | 0.95 (0.89-1.01) | 0.13                       | 0.68 |
| 16q23.2   | rs13329835 | 80650805  | A | G | 1.04 (0.98-1.10) | 0.19                       | 0.53 | 1.05 (0.97-1.13) | 0.22                       | 0.32 |
| 17q22     | rs6504950  | 53056471  | G | A | 0.96 (0.91-1.02) | 0.17                       | 0.06 | 1.04 (0.97-1.12) | 0.25                       | 0.98 |
| 18q11.2   | rs527616   | 24337424  | C | G | 0.99 (0.94-1.04) | 0.60                       | 0.92 | 0.97 (0.91-1.04) | 0.45                       | 0.64 |
| 18q11.2   | rs1436904  | 22824665  | A | C | 0.99 (0.94-1.04) | 0.61                       | 0.88 | 0.97 (0.91-1.04) | 0.42                       | 0.56 |
| 19p13.11  | rs8170     | 17389704  | G | A | 1.17 (1.10-1.24) | <b>5.4x10<sup>-7</sup></b> | 0.29 | 0.95 (0.87-1.03) | 0.20                       | 0.40 |
| 19p13.11  | rs4808801  | 18571141  | A | G | 0.97 (0.92-1.02) | 0.24                       | 0.39 | 0.95 (0.89-1.02) | 0.20                       | 0.23 |
| 19q13.31  | rs3760982  | 44286513  | G | A | 1.01 (0.97-1.06) | 0.57                       | 0.10 | 1.03 (0.97-1.10) | 0.31                       | 0.25 |
| 21q21.1   | rs2823093  | 16520832  | G | A | 0.95 (0.9-1.00)  | 0.07                       | 0.93 | 0.91 (0.85-0.98) | 0.02                       | 0.15 |
| 22q12.2   | rs132390   | 29621477  | A | G | 1.06 (0.93-1.21) | 0.38                       | 0.02 | 1.14 (0.96-1.36) | 0.13                       | 0.75 |
| 22q13.1   | rs6001930  | 40876234  | A | G | 1.10 (1.03-1.19) | <b>8.1x10<sup>-3</sup></b> | 0.08 | 1.01 (0.90-1.12) | 0.90                       | 1.00 |

# Reference and effect allele

**Table S8** Associations of 74 previously reported breast cancer susceptibility variants with lobular breast cancer in *BRCA2* mutation carriers. Associations with  $p < 0.01$  in bold.

| Locus    | SNP        | Position  | Ref <sup>#</sup> | Eff <sup>#</sup> | HR (95%CI)       | p    | p <sub>het</sub> |
|----------|------------|-----------|------------------|------------------|------------------|------|------------------|
| 1p36.22  | rs616488   | 10566215  | A                | G                | 0.95 (0.76-1.18) | 0.62 | 0.75             |
| 1p13.2   | rs12022378 | 114448389 | G                | A                | 0.95 (0.73-1.25) | 0.74 | 0.48             |
| 1p11.2   | rs11249433 | 121280613 | A                | G                | 1.06 (0.86-1.30) | 0.58 | 0.97             |
| 1q32.1_1 | rs6678914  | 202187176 | G                | A                | 1.20 (0.99-1.45) | 0.07 | 0.19             |
| 1q32.1_2 | rs4245739  | 204518842 | A                | C                | 0.86 (0.68-1.09) | 0.22 | 0.32             |
| 2p24.1   | rs12710696 | 19320803  | G                | A                | 0.76 (0.61-0.94) | 0.01 | 0.01             |
| 2q14.2   | rs4849887  | 121245122 | G                | A                | 1.02 (0.73-1.43) | 0.89 | 0.77             |
| 2q31.1   | rs2016394  | 172972971 | G                | A                | 0.81 (0.66-0.99) | 0.04 | 0.05             |
| 2q31.1   | rs1550623  | 174212894 | A                | G                | 0.93 (0.71-1.21) | 0.58 | 0.70             |
| 2q35     | rs13387042 | 217905832 | A                | G                | 0.85 (0.70-1.03) | 0.09 | 0.14             |
| 2q35     | rs16857609 | 218296508 | G                | A                | 1.14 (0.92-1.42) | 0.24 | 0.15             |
| 3p26.1   | rs6762644  | 4742276   | A                | G                | 1.02 (0.83-1.25) | 0.84 | 0.73             |
| 3p24.1   | rs4973768  | 27416013  | G                | A                | 1.09 (0.88-1.36) | 0.41 | 0.99             |
| 3p24.1   | rs12493607 | 30682939  | C                | G                | 0.99 (0.80-1.22) | 0.90 | 0.99             |
| 4q24     | rs9790517  | 106084778 | G                | A                | 1.08 (0.85-1.37) | 0.54 | 0.32             |
| 4q34.1   | rs6828523  | 175846426 | C                | A                | 0.82 (0.57-1.17) | 0.27 | 0.30             |
| 5p15.33  | rs10069690 | 1279790   | G                | A                | 0.97 (0.76-1.23) | 0.77 | 0.23             |
| 5p15.33  | rs7725218  | 1282414   | G                | A                | 0.96 (0.77-1.20) | 0.75 | 0.44             |
| 5p15.33  | rs2736108  | 1297488   | G                | A                | 1.01 (0.80-1.27) | 0.96 | 0.43             |
| 5p12     | rs10941679 | 44706498  | A                | G                | 1.03 (0.82-1.29) | 0.79 | 0.74             |
| 5q11.2   | rs889312   | 56031884  | A                | C                | 1.15 (0.92-1.43) | 0.21 | 0.37             |
| 5q11.3   | rs10472076 | 58184061  | A                | G                | 0.87 (0.69-1.09) | 0.22 | 0.28             |
| 5q11.3   | rs1353747  | 58337481  | A                | C                | 0.79 (0.54-1.15) | 0.21 | 0.29             |
| 5q33.3   | rs1432679  | 158244083 | A                | G                | 0.94 (0.76-1.17) | 0.60 | 0.66             |
| 6p25.3   | rs11242675 | 1318878   | A                | G                | 0.92 (0.75-1.14) | 0.46 | 0.50             |
| 6p24.3   | rs9348512  | 10456706  | C                | A                | 0.77 (0.63-0.95) | 0.01 | 0.32             |
| 6p23     | rs204247   | 13722523  | A                | G                | 1.06 (0.86-1.31) | 0.61 | 0.75             |

|          |                     |           |   |   |                  |      |      |
|----------|---------------------|-----------|---|---|------------------|------|------|
| 6q14     | rs17530068          | 82193109  | A | G | 1.13 (0.88-1.44) | 0.34 | 0.81 |
| 6q25.1   | rs3757318           | 151914113 | G | A | 1.06 (0.72-1.56) | 0.78 | 0.64 |
| 6q25.1   | rs2046210           | 151948366 | G | A | 1.02 (0.83-1.25) | 0.87 | 0.70 |
| 7q35     | rs720475            | 144074929 | G | A | 0.85 (0.67-1.08) | 0.19 | 0.27 |
| 8p12     | rs9693444           | 29509616  | C | A | 0.98 (0.79-1.21) | 0.86 | 0.92 |
| 8q21.11  | rs6472903           | 76230301  | A | C | 0.77 (0.55-1.06) | 0.11 | 0.14 |
| 8q21.11  | rs2943559           | 76417937  | A | G | 1.15 (0.81-1.63) | 0.44 | 0.75 |
| 8q24.21  | rs11780156          | 129194641 | G | A | 0.79 (0.60-1.03) | 0.08 | 0.12 |
| 8q24.21  | rs13281615          | 128355618 | A | G | 0.94 (0.76-1.16) | 0.55 | 0.28 |
| 9p21.3   | rs1011970           | 22062134  | C | A | 1.01 (0.78-1.31) | 0.95 | 0.86 |
| 9q31.2   | rs10759243          | 110306115 | C | A | 0.96 (0.76-1.21) | 0.73 | 0.72 |
| 9q31.2   | rs865686            | 110888478 | A | C | 1.00 (0.80-1.24) | 0.97 | 0.96 |
| 10p12.31 | rs7072776           | 22032942  | G | A | 1.07 (0.86-1.34) | 0.53 | 0.55 |
| 10p12.31 | rs11814448          | 22315843  | A | C |                  |      |      |
| 10q21.2  | rs10995190          | 64278682  | G | A | 1.02 (0.75-1.39) | 0.89 | 0.59 |
| 10q22.3  | rs704010            | 80841148  | G | A | 0.86 (0.69-1.06) | 0.15 | 0.13 |
| 10q25.2  | rs7904519           | 114773927 | A | G | 1.14 (0.93-1.40) | 0.21 | 0.31 |
| 10q26.12 | rs2981579           | 123337335 | G | A | 1.25 (1.02-1.53) | 0.03 | 0.99 |
| 10q26.12 | rs11199914          | 123093901 | G | A | 1.05 (0.85-1.29) | 0.65 | 0.34 |
| 11p15.5  | rs3817198           | 1909006   | A | G | 1.10 (0.89-1.38) | 0.38 | 0.89 |
| 11q13.1  | rs3903072           | 65583066  | C | A | 1.06 (0.85-1.32) | 0.61 | 0.54 |
| 11q13.3  | rs554219            | 69331642  | C | G | 1.06 (0.79-1.43) | 0.69 | 0.86 |
| 11q13.3  | c11_pos690<br>88342 | 69379161  | C | A | 1.04 (0.68-1.59) | 0.85 | 0.84 |
| 11q13.3  | rs494406            | 69344241  | G | A | 0.98 (0.78-1.22) | 0.85 | 0.50 |
| 11q24.3  | rs11820646          | 129461171 | G | A | 1.04 (0.85-1.27) | 0.69 | 0.18 |
| 12p13.1  | rs12422552          | 14413931  | G | C | 1.24 (0.99-1.55) | 0.06 | 0.04 |
| 12p11.22 | rs10771399          | 28155080  | A | G | 0.96 (0.69-1.36) | 0.84 | 0.63 |
| 12q22    | rs17356907          | 96027759  | A | G | 1.13 (0.92-1.38) | 0.26 | 0.25 |
| 12q24.21 | rs1292011           | 115836522 | A | G | 0.82 (0.68-1.00) | 0.05 | 0.26 |

|           |            |          |   |   |                  |                            |      |  |
|-----------|------------|----------|---|---|------------------|----------------------------|------|--|
| 13q13.1   | rs11571833 | 32972626 | T | A |                  |                            |      |  |
| 14q13.3   | rs2236007  | 37132769 | G | A | 1.2 (0.95-1.52)  | 0.13                       | 0.12 |  |
| 14q24.1   | rs2588809  | 68660428 | G | A | 0.94 (0.71-1.24) | 0.67                       | 0.64 |  |
| 14q24.1   | rs999737   | 69034682 | G | A | 0.91 (0.72-1.15) | 0.44                       | 0.62 |  |
| 14q32.11  | rs941764   | 91841069 | A | G | 0.87 (0.70-1.08) | 0.21                       | 0.13 |  |
| 16q12.1_1 | rs3803662  | 52586341 | G | A | 1.57 (1.29-1.92) | <b>8.2x10<sup>-6</sup></b> | 0.01 |  |
| 16q12.1_2 | rs11075995 | 53855291 | A | T | 0.88 (0.69-1.13) | 0.33                       | 0.25 |  |
| 16q12.1_2 | rs17817449 | 53813367 | A | C | 0.94 (0.75-1.17) | 0.57                       | 0.97 |  |
| 16q23.2   | rs13329835 | 80650805 | A | G | 1.03 (0.82-1.29) | 0.79                       | 1.00 |  |
| 17q22     | rs6504950  | 53056471 | G | A | 0.98 (0.78-1.21) | 0.82                       | 0.52 |  |
| 18q11.2   | rs527616   | 24337424 | C | G | 1.10 (0.91-1.32) | 0.34                       | 0.17 |  |
| 18q11.2   | rs1436904  | 22824665 | A | C | 0.87 (0.71-1.07) | 0.19                       | 0.31 |  |
| 19p13.11  | rs8170     | 17389704 | G | A | 0.84 (0.62-1.12) | 0.23                       | 0.32 |  |
| 19p13.11  | rs4808801  | 18571141 | A | G | 0.88 (0.72-1.09) | 0.24                       | 0.34 |  |
| 19q13.31  | rs3760982  | 44286513 | G | A | 1.12 (0.92-1.36) | 0.25                       | 0.51 |  |
| 21q21.1   | rs2823093  | 16520832 | G | A | 1.17 (0.92-1.47) | 0.19                       | 0.05 |  |
| 22q12.2   | rs132390   | 29621477 | A | G | 0.87 (0.48-1.58) | 0.65                       | 0.33 |  |
| 22q13.1   | rs6001930  | 40876234 | A | G | 1.04 (0.72-1.51) | 0.83                       | 0.85 |  |

---

# Reference and effect allele

**Table S9** Associations of 74 previously reported breast cancer susceptibility variants with breast cancer by tumor grade *BRCA1* and *BRCA2* mutation carriers. Associations with  $p < 0.01$  in bold.

| Locus    | SNP        | Position  | Ref <sup>#</sup> | Eff <sup>#</sup> | <i>BRCA1</i> carriers |                            |                  |                             |           | <i>BRCA2</i> carriers |      |                  |                            |           |
|----------|------------|-----------|------------------|------------------|-----------------------|----------------------------|------------------|-----------------------------|-----------|-----------------------|------|------------------|----------------------------|-----------|
|          |            |           |                  |                  | grade 1 or 2          |                            | grade 3          |                             | $p_{het}$ | grade 1 or 2          |      | grade 3          |                            | $p_{het}$ |
|          |            |           |                  |                  | HR (95%CI)            | p                          | HR (95%CI)       | p                           | $p_{het}$ | HR (95%CI)            | p    | HR (95%CI)       | p                          | $p_{het}$ |
| 1p36.22  | rs616488   | 10566215  | A                | G                | 1.02 (0.91-1.13)      | 0.76                       | 0.95 (0.90-1.00) | 0.05                        | 0.28      | 1.00 (0.90-1.10)      | 0.94 | 0.95 (0.87-1.05) | 0.34                       | 0.58      |
| 1p13.2   | rs12022378 | 114448389 | G                | A                | 1.06 (0.92-1.22)      | 0.42                       | 1.03 (0.96-1.10) | 0.39                        | 0.73      | 1.03 (0.91-1.16)      | 0.69 | 1.04 (0.92-1.18) | 0.50                       | 0.86      |
| 1p11.2   | rs11249433 | 121280613 | A                | G                | 0.98 (0.88-1.09)      | 0.66                       | 1.00 (0.95-1.05) | 0.94                        | 0.72      | 1.01 (0.92-1.10)      | 0.85 | 1.10 (1.00-1.20) | 0.04                       | 0.22      |
| 1q32.1_1 | rs6678914  | 202187176 | G                | A                | 0.99 (0.89-1.10)      | 0.87                       | 0.98 (0.93-1.03) | 0.42                        | 0.85      | 1.06 (0.97-1.17)      | 0.20 | 1.02 (0.93-1.12) | 0.64                       | 0.59      |
| 1q32.1_2 | rs4245739  | 204518842 | A                | C                | 1.00 (0.89-1.12)      | 0.99                       | 1.12 (1.07-1.18) | <b>1.1x10<sup>-5</sup></b>  | 0.08      | 0.90 (0.81-1.00)      | 0.04 | 1.03 (0.93-1.14) | 0.55                       | 0.09      |
| 2p24.1   | rs12710696 | 19320803  | G                | A                | 1.05 (0.95-1.17)      | 0.33                       | 1.01 (0.96-1.06) | 0.79                        | 0.46      | 0.93 (0.85-1.02)      | 0.13 | 1.08 (0.99-1.18) | 0.09                       | 0.03      |
| 2q14.2   | rs4849887  | 121245122 | G                | A                | 0.87 (0.73-1.04)      | 0.13                       | 1.06 (0.99-1.15) | 0.11                        | 0.06      | 0.95 (0.81-1.10)      | 0.48 | 1.01 (0.87-1.17) | 0.92                       | 0.60      |
| 2q31.1   | rs2016394  | 172972971 | G                | A                | 0.98 (0.88-1.10)      | 0.77                       | 1.02 (0.97-1.07) | 0.41                        | 0.57      | 0.93 (0.85-1.02)      | 0.12 | 1.05 (0.96-1.15) | 0.30                       | 0.09      |
| 2q31.1   | rs1550623  | 174212894 | A                | G                | 0.95 (0.81-1.11)      | 0.50                       | 1.02 (0.96-1.09) | 0.50                        | 0.40      | 0.92 (0.81-1.03)      | 0.16 | 1.02 (0.90-1.15) | 0.78                       | 0.24      |
| 2q35     | rs13387042 | 217905832 | A                | G                | 0.98 (0.89-1.09)      | 0.73                       | 0.98 (0.93-1.03) | 0.39                        | 0.96      | 0.93 (0.85-1.02)      | 0.11 | 1.02 (0.93-1.11) | 0.69                       | 0.17      |
| 2q35     | rs16857609 | 218296508 | G                | A                | 1.05 (0.93-1.18)      | 0.45                       | 1.05 (0.99-1.10) | 0.10                        | 0.98      | 0.91 (0.82-1.01)      | 0.09 | 1.02 (0.92-1.13) | 0.69                       | 0.17      |
| 3p26.1   | rs6762644  | 4742276   | A                | G                | 1.16 (1.04-1.29)      | <b>7.2x10<sup>-3</sup></b> | 1.00 (0.96-1.06) | 0.85                        | 0.03      | 0.95 (0.86-1.05)      | 0.32 | 1.01 (0.92-1.10) | 0.90                       | 0.45      |
| 3p24.1   | rs4973768  | 27416013  | G                | A                | 1.07 (0.97-1.19)      | 0.16                       | 1.00 (0.95-1.04) | 0.91                        | 0.20      | 1.07 (0.98-1.18)      | 0.15 | 1.11 (1.02-1.22) | 0.02                       | 0.60      |
| 3p24.1   | rs12493607 | 30682939  | C                | G                | 0.99 (0.89-1.11)      | 0.92                       | 0.99 (0.95-1.04) | 0.82                        | 1.00      | 1.01 (0.92-1.12)      | 0.82 | 0.97 (0.88-1.07) | 0.53                       | 0.57      |
| 4q24     | rs9790517  | 106084778 | G                | A                | 0.95 (0.84-1.07)      | 0.40                       | 0.99 (0.94-1.05) | 0.85                        | 0.51      | 1.00 (0.90-1.12)      | 0.93 | 0.93 (0.84-1.04) | 0.22                       | 0.39      |
| 4q34.1   | rs6828523  | 175846426 | C                | A                | 1.01 (0.85-1.19)      | 0.93                       | 1.03 (0.96-1.12) | 0.40                        | 0.80      | 1.00 (0.86-1.17)      | 0.97 | 0.95 (0.82-1.10) | 0.54                       | 0.67      |
| 5p15.33  | rs10069690 | 1279790   | G                | A                | 1.15 (1.02-1.29)      | 0.02                       | 1.22 (1.16-1.29) | <b>2.4x10<sup>-13</sup></b> | 0.39      | 1.05 (0.95-1.17)      | 0.35 | 1.17 (1.06-1.30) | <b>1.9x10<sup>-3</sup></b> | 0.17      |
| 5p15.33  | rs7725218  | 1282414   | G                | A                | 1.04 (0.93-1.17)      | 0.46                       | 1.09 (1.04-1.15) | <b>5.4x10<sup>-4</sup></b>  | 0.51      | 1.06 (0.96-1.17)      | 0.23 | 1.05 (0.95-1.15) | 0.33                       | 0.88      |
| 5p15.33  | rs2736108  | 1297488   | G                | A                | 0.94 (0.84-1.06)      | 0.32                       | 0.88 (0.83-0.92) | <b>1.3x10<sup>-6</sup></b>  | 0.28      | 0.89 (0.81-0.99)      | 0.04 | 0.97 (0.88-1.07) | 0.57                       | 0.30      |
| 5p12     | rs10941679 | 44706498  | A                | G                | 1.04 (0.92-1.18)      | 0.52                       | 0.97 (0.92-1.03) | 0.36                        | 0.36      | 1.09 (0.98-1.21)      | 0.11 | 1.05 (0.95-1.16) | 0.37                       | 0.64      |
| 5q11.2   | rs889312   | 56031884  | A                | C                | 0.99 (0.88-1.11)      | 0.82                       | 1.02 (0.97-1.08) | 0.41                        | 0.60      | 1.00 (0.9-1.10)       | 0.98 | 1.08 (0.98-1.19) | 0.11                       | 0.29      |
| 5q11.3   | rs10472076 | 58184061  | A                | G                | 1.03 (0.92-1.14)      | 0.62                       | 1.00 (0.95-1.05) | 1.00                        | 0.67      | 0.97 (0.88-1.07)      | 0.54 | 1.00 (0.91-1.10) | 0.98                       | 0.70      |
| 5q11.3   | rs1353747  | 58337481  | A                | C                | 0.91 (0.76-1.10)      | 0.34                       | 0.99 (0.91-1.07) | 0.81                        | 0.45      | 0.96 (0.82-1.12)      | 0.56 | 0.97 (0.83-1.14) | 0.72                       | 0.89      |
| 5q33.3   | rs1432679  | 158244083 | A                | G                | 1.00 (0.90-1.10)      | 0.94                       | 1.06 (1.01-1.11) | 0.02                        | 0.31      | 0.96 (0.88-1.06)      | 0.43 | 1.03 (0.95-1.13) | 0.46                       | 0.31      |
| 6p25.3   | rs11242675 | 1318878   | A                | G                | 1.01 (0.91-1.14)      | 0.79                       | 0.95 (0.90-1.00) | 0.03                        | 0.28      | 1.00 (0.91-1.10)      | 0.94 | 0.99 (0.90-1.09) | 0.83                       | 0.86      |



|          |                 |           |   |   |                  |                            |                  |                             |                            |                  |                            |                  |                            |      |
|----------|-----------------|-----------|---|---|------------------|----------------------------|------------------|-----------------------------|----------------------------|------------------|----------------------------|------------------|----------------------------|------|
| 6p24.3   | rs9348512       | 10456706  | C | A | 0.93 (0.83-1.04) | 0.19                       | 1.01 (0.96-1.06) | 0.70                        | 0.20                       | 0.82 (0.74-0.90) | <b>2.1x10<sup>-5</sup></b> | 0.88 (0.81-0.97) | <b>9.1x10<sup>-3</sup></b> | 0.27 |
| 6p23     | rs204247        | 13722523  | A | G | 1.08 (0.98-1.19) | 0.14                       | 0.98 (0.93-1.03) | 0.44                        | 0.11                       | 1.04 (0.95-1.14) | 0.36                       | 1.13 (1.04-1.24) | <b>6.1x10<sup>-3</sup></b> | 0.24 |
| 6q14     | rs17530068      | 82193109  | A | G | 1.01 (0.90-1.14) | 0.84                       | 1.03 (0.98-1.09) | 0.27                        | 0.78                       | 1.08 (0.98-1.20) | 0.14                       | 1.12 (1.01-1.24) | 0.03                       | 0.67 |
| 6q25.1   | rs3757318       | 151914113 | G | A | 1.04 (0.85-1.28) | 0.68                       | 1.24 (1.14-1.35) | <b>4.1x10<sup>-7</sup></b>  | 0.14                       | 1.10 (0.93-1.30) | 0.28                       | 1.20 (1.02-1.41) | 0.02                       | 0.48 |
| 6q25.1   | rs2046210       | 151948366 | G | A | 1.12 (1.01-1.25) | 0.04                       | 1.17 (1.12-1.23) | <b>2.2x10<sup>-10</sup></b> | 0.51                       | 1.03 (0.93-1.13) | 0.58                       | 1.09 (0.99-1.20) | 0.07                       | 0.42 |
| 7q35     | rs720475        | 144074929 | G | A | 0.92 (0.82-1.05) | 0.21                       | 0.99 (0.94-1.05) | 0.78                        | 0.34                       | 1.04 (0.94-1.16) | 0.41                       | 0.92 (0.83-1.02) | 0.11                       | 0.11 |
| 8p12     | rs9693444       | 29509616  | C | A | 1.06 (0.95-1.18) | 0.30                       | 0.99 (0.94-1.04) | 0.75                        | 0.30                       | 1.00 (0.91-1.10) | 0.98                       | 0.97 (0.88-1.06) | 0.48                       | 0.64 |
| 8q21.11  | rs6472903       | 76230301  | A | C | 0.92 (0.80-1.06) | 0.27                       | 1.03 (0.97-1.10) | 0.38                        | 0.19                       | 0.99 (0.87-1.13) | 0.91                       | 0.95 (0.84-1.08) | 0.46                       | 0.69 |
| 8q21.11  | rs2943559       | 76417937  | A | G | 1.27 (1.07-1.52) | <b>7.1x10<sup>-3</sup></b> | 1.00 (0.92-1.10) | 0.94                        | 0.02                       | 1.08 (0.92-1.27) | 0.35                       | 1.12 (0.96-1.31) | 0.15                       | 0.76 |
| 8q24.21  | rs11780156      | 129194641 | G | A | 0.81 (0.71-0.93) | <b>3.6x10<sup>-3</sup></b> | 0.98 (0.93-1.04) | 0.60                        | 0.02                       | 1.00 (0.89-1.12) | 0.99                       | 0.95 (0.85-1.06) | 0.33                       | 0.53 |
| 8q24.21  | rs13281615      | 128355618 | A | G | 1.04 (0.93-1.15) | 0.51                       | 1.01 (0.96-1.06) | 0.68                        | 0.68                       | 0.98 (0.89-1.07) | 0.63                       | 1.10 (1.01-1.21) | 0.04                       | 0.09 |
| 9p21.3   | rs1011970       | 22062134  | C | A | 0.96 (0.82-1.11) | 0.54                       | 1.04 (0.97-1.11) | 0.26                        | 0.33                       | 1.06 (0.95-1.20) | 0.30                       | 0.98 (0.87-1.10) | 0.77                       | 0.38 |
| 9q31.2   | rs10759243      | 110306115 | C | A | 1.00 (0.89-1.12) | 0.95                       | 0.98 (0.93-1.03) | 0.45                        | 0.80                       | 1.02 (0.92-1.13) | 0.75                       | 0.98 (0.89-1.09) | 0.76                       | 0.68 |
| 9q31.2   | rs865686        | 110888478 | A | C | 0.97 (0.87-1.09) | 0.63                       | 1.00 (0.95-1.05) | 0.95                        | 0.70                       | 0.98 (0.89-1.08) | 0.64                       | 1.00 (0.91-1.10) | 0.99                       | 0.77 |
| 10p12.31 | rs7072776       | 22032942  | G | A | 1.04 (0.93-1.16) | 0.50                       | 0.98 (0.93-1.03) | 0.35                        | 0.33                       | 1.00 (0.91-1.10) | 0.99                       | 1.00 (0.91-1.10) | 0.95                       | 0.97 |
| 10p12.31 | rs11814448      | 22315843  | A | C |                  |                            |                  |                             |                            |                  |                            |                  |                            |      |
| 10q21.2  | rs10995190      | 64278682  | G | A | 1.02 (0.88-1.18) | 0.84                       | 0.98 (0.92-1.05) | 0.58                        | 0.69                       | 0.96 (0.83-1.10) | 0.53                       | 0.94 (0.82-1.07) | 0.32                       | 0.83 |
| 10q22.3  | rs704010        | 80841148  | G | A | 1.08 (0.97-1.21) | 0.15                       | 1.00 (0.95-1.05) | 1.00                        | 0.22                       | 1.01 (0.93-1.11) | 0.77                       | 0.99 (0.90-1.08) | 0.82                       | 0.73 |
| 10q25.2  | rs7904519       | 114773927 | A | G | 1.11 (1.00-1.23) | 0.04                       | 1.09 (1.04-1.15) | <b>2.1x10<sup>-4</sup></b>  | 0.79                       | 1.03 (0.94-1.13) | 0.50                       | 1.01 (0.92-1.10) | 0.85                       | 0.75 |
| 10q26.12 | rs2981579       | 123337335 | G | A | 1.15 (1.03-1.28) | 0.01                       | 0.96 (0.91-1.01) | 0.09                        | <b>4.1x10<sup>-3</sup></b> | 1.31 (1.20-1.44) | <b>4.8x10<sup>-9</sup></b> | 1.17 (1.07-1.28) | <b>7.1x10<sup>-4</sup></b> | 0.09 |
| 10q26.12 | rs11199914      | 123093901 | G | A | 0.99 (0.88-1.10) | 0.82                       | 1.03 (0.98-1.09) | 0.20                        | 0.48                       | 0.94 (0.85-1.03) | 0.19                       | 0.97 (0.88-1.07) | 0.56                       | 0.63 |
| 11p15.5  | rs3817198       | 1909006   | A | G | 1.12 (1.00-1.25) | 0.06                       | 1.07 (1.02-1.12) | <b>9.8x10<sup>-3</sup></b>  | 0.52                       | 1.05 (0.95-1.16) | 0.32                       | 1.18 (1.07-1.29) | <b>7.0x10<sup>-4</sup></b> | 0.13 |
| 11q13.1  | rs3903072       | 65583066  | C | A | 0.98 (0.88-1.08) | 0.65                       | 1.00 (0.95-1.04) | 0.89                        | 0.74                       | 1.00 (0.91-1.10) | 0.97                       | 0.97 (0.88-1.05) | 0.43                       | 0.59 |
| 11q13.3  | rs554219        | 69331642  | C | G | 1.06 (0.90-1.24) | 0.49                       | 1.02 (0.95-1.10) | 0.50                        | 0.74                       | 1.12 (0.99-1.28) | 0.08                       | 1.06 (0.93-1.21) | 0.37                       | 0.58 |
| 11q13.3  | c11_pos69088342 | 69379161  | C | A | 1.00 (0.80-1.25) | 0.99                       | 1.04 (0.94-1.16) | 0.41                        | 0.74                       | 1.09 (0.91-1.32) | 0.35                       | 1.05 (0.87-1.27) | 0.58                       | 0.80 |
| 11q13.3  | rs494406        | 69344241  | G | A | 0.98 (0.87-1.11) | 0.76                       | 1.03 (0.97-1.09) | 0.31                        | 0.50                       | 1.02 (0.93-1.13) | 0.64                       | 1.07 (0.97-1.19) | 0.15                       | 0.53 |
| 11q24.3  | rs11820646      | 129461171 | G | A | 0.89 (0.80-0.99) | 0.03                       | 0.94 (0.89-0.99) | <b>0.01</b>                 | 0.35                       | 0.99 (0.90-1.08) | 0.79                       | 0.85 (0.77-0.93) | <b>5.0x10<sup>-4</sup></b> | 0.03 |
| 12p13.1  | rs12422552      | 14413931  | G | C | 0.95 (0.84-1.07) | 0.39                       | 1.03 (0.98-1.09) | 0.29                        | 0.26                       | 0.98 (0.89-1.09) | 0.74                       | 1.01 (0.91-1.11) | 0.87                       | 0.75 |
| 12p11.22 | rs10771399      | 28155080  | A | G | 0.94 (0.79-1.12) | 0.47                       | 0.83 (0.76-0.90) | <b>4.8x10<sup>-6</sup></b>  | 0.24                       | 0.80 (0.68-0.94) | <b>6.6x10<sup>-3</sup></b> | 0.97 (0.85-1.12) | 0.69                       | 0.10 |

|           |            |           |   |   |                  |      |                  |                            |                            |                  |                            |                  |                            |      |
|-----------|------------|-----------|---|---|------------------|------|------------------|----------------------------|----------------------------|------------------|----------------------------|------------------|----------------------------|------|
| 12q22     | rs17356907 | 96027759  | A | G | 0.97 (0.86-1.09) | 0.61 | 0.95 (0.90-1.00) | 0.04                       | 0.72                       | 1.04 (0.94-1.14) | 0.44                       | 0.95 (0.86-1.05) | 0.30                       | 0.23 |
| 12q24.21  | rs1292011  | 115836522 | A | G | 0.87 (0.78-0.97) | 0.01 | 1.04 (0.99-1.09) | 0.14                       | <b>6.1x10<sup>-3</sup></b> | 0.86 (0.79-0.95) | <b>1.8x10<sup>-3</sup></b> | 0.97 (0.89-1.06) | 0.51                       | 0.09 |
| 13q13.1   | rs11571833 | 32972626  | T | A |                  |      |                  |                            |                            |                  |                            |                  |                            |      |
| 14q13.3   | rs2236007  | 37132769  | G | A | 0.94 (0.83-1.07) | 0.37 | 0.97 (0.92-1.03) | 0.36                       | 0.68                       | 1.00 (0.90-1.12) | 0.97                       | 1.00 (0.89-1.12) | 0.96                       | 0.96 |
| 14q24.1   | rs2588809  | 68660428  | G | A | 0.95 (0.83-1.09) | 0.49 | 0.96 (0.90-1.02) | 0.18                       | 0.95                       | 0.92 (0.82-1.04) | 0.19                       | 1.10 (0.98-1.23) | 0.11                       | 0.06 |
| 14q24.1   | rs999737   | 69034682  | G | A | 1.01 (0.89-1.14) | 0.92 | 0.95 (0.89-1.00) | 0.07                       | 0.42                       | 0.96 (0.86-1.07) | 0.49                       | 0.97 (0.87-1.08) | 0.58                       | 0.93 |
| 14q32.11  | rs941764   | 91841069  | A | G | 1.05 (0.94-1.18) | 0.34 | 1.02 (0.97-1.07) | 0.53                       | 0.58                       | 1.05 (0.96-1.15) | 0.31                       | 1.01 (0.92-1.11) | 0.83                       | 0.59 |
| 16q12.1_1 | rs3803662  | 52586341  | G | A | 1.05 (0.94-1.18) | 0.40 | 1.06 (1.01-1.12) | 0.03                       | 0.89                       | 1.20 (1.09-1.33) | <b>2.1x10<sup>-4</sup></b> | 1.26 (1.15-1.39) | <b>1.8x10<sup>-6</sup></b> | 0.54 |
| 16q12.1_2 | rs11075995 | 53855291  | A | T | 1.01 (0.89-1.14) | 0.86 | 1.01 (0.96-1.07) | 0.69                       | 1.00                       | 1.05 (0.94-1.16) | 0.41                       | 1.00 (0.90-1.11) | 1.00                       | 0.59 |
| 16q12.1_2 | rs17817449 | 53813367  | A | C | 0.88 (0.79-0.99) | 0.03 | 0.97 (0.92-1.01) | 0.17                       | 0.17                       | 0.96 (0.87-1.05) | 0.35                       | 0.93 (0.84-1.02) | 0.11                       | 0.69 |
| 16q23.2   | rs13329835 | 80650805  | A | G | 0.99 (0.87-1.12) | 0.85 | 1.06 (1.00-1.12) | 0.04                       | 0.34                       | 1.07 (0.97-1.19) | 0.17                       | 1.00 (0.90-1.10) | 0.93                       | 0.32 |
| 17q22     | rs6504950  | 53056471  | G | A | 1.02 (0.9-1.14)  | 0.79 | 0.98 (0.93-1.04) | 0.48                       | 0.61                       | 1.03 (0.93-1.14) | 0.55                       | 1.05 (0.95-1.16) | 0.31                       | 0.78 |
| 18q11.2   | rs527616   | 24337424  | C | G | 1.12 (1.00-1.24) | 0.04 | 0.96 (0.91-1.01) | 0.09                       | 0.01                       | 0.95 (0.87-1.04) | 0.26                       | 0.98 (0.89-1.07) | 0.65                       | 0.64 |
| 18q11.2   | rs1436904  | 22824665  | A | C | 1.03 (0.92-1.14) | 0.61 | 0.98 (0.93-1.03) | 0.41                       | 0.44                       | 0.96 (0.88-1.06) | 0.44                       | 0.94 (0.86-1.03) | 0.20                       | 0.75 |
| 19p13.11  | rs8170     | 17389704  | G | A | 1.14 (1.00-1.30) | 0.05 | 1.20 (1.13-1.27) | <b>4.6x10<sup>-9</sup></b> | 0.51                       | 0.98 (0.86-1.10) | 0.70                       | 0.96 (0.86-1.08) | 0.53                       | 0.89 |
| 19p13.11  | rs4808801  | 18571141  | A | G | 0.97 (0.86-1.08) | 0.54 | 0.98 (0.94-1.03) | 0.53                       | 0.78                       | 0.99 (0.90-1.09) | 0.82                       | 0.95 (0.87-1.05) | 0.33                       | 0.62 |
| 19q13.31  | rs3760982  | 44286513  | G | A | 0.98 (0.88-1.09) | 0.74 | 1.05 (1.00-1.10) | 0.05                       | 0.30                       | 1.06 (0.97-1.15) | 0.22                       | 1.04 (0.96-1.14) | 0.33                       | 0.87 |
| 21q21.1   | rs2823093  | 16520832  | G | A | 0.86 (0.76-0.97) | 0.01 | 0.98 (0.93-1.03) | 0.39                       | 0.07                       | 0.89 (0.80-1.00) | 0.04                       | 0.99 (0.89-1.10) | 0.81                       | 0.23 |
| 22q12.2   | rs132390   | 29621477  | A | G | 1.15 (0.89-1.50) | 0.29 | 0.94 (0.82-1.08) | 0.40                       | 0.20                       | 1.20 (0.93-1.55) | 0.17                       | 1.18 (0.93-1.49) | 0.18                       | 0.92 |
| 22q13.1   | rs6001930  | 40876234  | A | G | 1.16 (0.98-1.37) | 0.08 | 1.05 (0.97-1.13) | 0.24                       | 0.31                       | 1.12 (0.97-1.29) | 0.13                       | 0.91 (0.78-1.06) | 0.23                       | 0.08 |

# Reference and effect allele

**Table S10** Associations of 74 previously reported breast cancer susceptibility variants with breast cancer by nodal involvement in *BRCA1* and *BRCA2* mutation carriers. Associations with  $p < 0.01$  are in bold.

| Locus    | SNP        | Position  | Ref <sup>#</sup> | Eff <sup>#</sup> | <i>BRCA1</i> carriers |                            |                  |                            |      | <i>BRCA2</i> carriers |      |                  |                            |      |
|----------|------------|-----------|------------------|------------------|-----------------------|----------------------------|------------------|----------------------------|------|-----------------------|------|------------------|----------------------------|------|
|          |            |           |                  |                  | node-negative         |                            | node-positive    |                            |      | node-negative         |      | node-positive    |                            |      |
|          |            |           |                  |                  | HR (95%CI)            | p                          | HR (95%CI)       | p                          | Phet | HR (95%CI)            | p    | HR (95%CI)       | p                          | Phet |
| 1p36.22  | rs616488   | 10566215  | A                | G                | 0.92 (0.87-0.98)      | <b>5.9x10<sup>-3</sup></b> | 1.05 (0.97-1.14) | 0.26                       | 0.02 | 0.96 (0.88-1.05)      | 0.35 | 1.00 (0.90-1.10) | 0.93                       | 0.61 |
| 1p13.2   | rs12022378 | 114448389 | G                | A                | 1.07 (0.99-1.15)      | 0.07                       | 0.97 (0.87-1.08) | 0.57                       | 0.17 | 0.97 (0.86-1.09)      | 0.58 | 1.12 (0.99-1.27) | 0.06                       | 0.09 |
| 1p11.2   | rs11249433 | 121280613 | A                | G                | 0.99 (0.94-1.05)      | 0.75                       | 1.00 (0.92-1.09) | 0.98                       | 0.89 | 1.04 (0.96-1.13)      | 0.35 | 1.07 (0.98-1.17) | 0.15                       | 0.66 |
| 1q32.1_1 | rs6678914  | 202187176 | G                | A                | 0.98 (0.93-1.04)      | 0.55                       | 0.98 (0.90-1.06) | 0.62                       | 0.94 | 1.05 (0.97-1.14)      | 0.23 | 1.03 (0.94-1.13) | 0.55                       | 0.75 |
| 1q32.1_2 | rs4245739  | 204518842 | A                | C                | 1.08 (1.02-1.14)      | 0.01                       | 1.14 (1.05-1.24) | <b>2.4x10<sup>-3</sup></b> | 0.30 | 0.95 (0.87-1.04)      | 0.28 | 0.98 (0.89-1.09) | 0.73                       | 0.66 |
| 2p24.1   | rs12710696 | 19320803  | G                | A                | 1.01 (0.96-1.07)      | 0.69                       | 1.03 (0.95-1.11) | 0.52                       | 0.77 | 1.02 (0.94-1.11)      | 0.58 | 0.98 (0.89-1.07) | 0.65                       | 0.49 |
| 2q14.2   | rs4849887  | 121245122 | G                | A                | 1.04 (0.95-1.13)      | 0.38                       | 0.99 (0.87-1.13) | 0.90                       | 0.59 | 1.06 (0.93-1.21)      | 0.36 | 0.87 (0.73-1.02) | 0.09                       | 0.07 |
| 2q31.1   | rs2016394  | 172972971 | G                | A                | 1.04 (0.98-1.1)       | 0.16                       | 0.96 (0.88-1.04) | 0.35                       | 0.15 | 1.03 (0.95-1.12)      | 0.49 | 0.94 (0.85-1.03) | 0.19                       | 0.17 |
| 2q31.1   | rs1550623  | 174212894 | A                | G                | 0.95 (0.88-1.03)      | 0.20                       | 1.13 (1.01-1.26) | 0.03                       | 0.02 | 0.91 (0.82-1.02)      | 0.12 | 1.04 (0.92-1.18) | 0.54                       | 0.13 |
| 2q35     | rs13387042 | 217905832 | A                | G                | 0.98 (0.93-1.03)      | 0.34                       | 0.99 (0.91-1.07) | 0.80                       | 0.77 | 1.00 (0.92-1.08)      | 0.94 | 0.94 (0.86-1.03) | 0.21                       | 0.39 |
| 2q35     | rs16857609 | 218296508 | G                | A                | 1.05 (0.99-1.11)      | 0.10                       | 1.04 (0.95-1.14) | 0.43                       | 0.83 | 0.96 (0.87-1.05)      | 0.37 | 0.98 (0.88-1.09) | 0.73                       | 0.75 |
| 3p26.1   | rs6762644  | 4742276   | A                | G                | 1.04 (0.98-1.09)      | 0.21                       | 1.03 (0.95-1.12) | 0.45                       | 0.96 | 0.98 (0.90-1.07)      | 0.70 | 0.97 (0.89-1.07) | 0.60                       | 0.90 |
| 3p24.1   | rs4973768  | 27416013  | G                | A                | 1.02 (0.97-1.07)      | 0.47                       | 1.00 (0.92-1.08) | 0.96                       | 0.67 | 1.05 (0.96-1.14)      | 0.27 | 1.15 (1.05-1.26) | <b>3.2x10<sup>-3</sup></b> | 0.15 |
| 3p24.1   | rs12493607 | 30682939  | C                | G                | 1.0 (0.95-1.06)       | 0.92                       | 0.98 (0.90-1.06) | 0.59                       | 0.63 | 0.96 (0.88-1.05)      | 0.34 | 1.03 (0.94-1.14) | 0.53                       | 0.28 |
| 4q24     | rs9790517  | 106084778 | G                | A                | 0.95 (0.89-1.01)      | 0.13                       | 1.05 (0.96-1.16) | 0.26                       | 0.09 | 0.99 (0.89-1.09)      | 0.78 | 0.95 (0.84-1.06) | 0.34                       | 0.61 |
| 4q34.1   | rs6828523  | 175846426 | C                | A                | 1.05 (0.97-1.14)      | 0.22                       | 0.98 (0.86-1.12) | 0.76                       | 0.4  | 1.00 (0.88-1.14)      | 0.97 | 0.95 (0.81-1.11) | 0.49                       | 0.60 |
| 5p15.33  | rs10069690 | 1279790   | G                | A                | 1.19 (1.12-1.26)      | <b>6.2x10<sup>-9</sup></b> | 1.24 (1.13-1.35) | <b>2.0x10<sup>-6</sup></b> | 0.5  | 1.11 (1.01-1.21)      | 0.03 | 1.12 (1.01-1.25) | 0.03                       | 0.86 |
| 5p15.33  | rs7725218  | 1282414   | G                | A                | 1.06 (1.01-1.12)      | 0.03                       | 1.12 (1.03-1.22) | <b>8.9x10<sup>-3</sup></b> | 0.36 | 1.04 (0.96-1.14)      | 0.35 | 1.07 (0.97-1.18) | 0.18                       | 0.70 |
| 5p15.33  | rs2736108  | 1297488   | G                | A                | 0.88 (0.83-0.94)      | <b>2.8x10<sup>-5</sup></b> | 0.91 (0.83-0.99) | 0.03                       | 0.59 | 0.96 (0.88-1.05)      | 0.40 | 0.90 (0.81-1.00) | 0.05                       | 0.36 |
| 5p12     | rs10941679 | 44706498  | A                | G                | 0.98 (0.92-1.04)      | 0.47                       | 1.01 (0.92-1.11) | 0.85                       | 0.6  | 1.04 (0.95-1.14)      | 0.36 | 1.1 (0.99-1.22)  | 0.07                       | 0.47 |
| 5q11.2   | rs889312   | 56031884  | A                | C                | 1.03 (0.98-1.10)      | 0.25                       | 0.98 (0.89-1.07) | 0.59                       | 0.31 | 1.02 (0.94-1.12)      | 0.60 | 1.06 (0.96-1.18) | 0.24                       | 0.60 |
| 5q11.3   | rs10472076 | 58184061  | A                | G                | 1.02 (0.97-1.08)      | 0.47                       | 0.98 (0.90-1.06) | 0.56                       | 0.4  | 0.96 (0.88-1.05)      | 0.36 | 1.02 (0.92-1.12) | 0.74                       | 0.41 |
| 5q11.3   | rs1353747  | 58337481  | A                | C                | 0.99 (0.90-1.08)      | 0.79                       | 0.95 (0.82-1.09) | 0.44                       | 0.64 | 0.96 (0.84-1.11)      | 0.61 | 0.96 (0.82-1.13) | 0.65                       | 1.00 |
| 5q33.3   | rs1432679  | 158244083 | A                | G                | 1.04 (0.99-1.10)      | 0.10                       | 1.05 (0.97-1.14) | 0.22                       | 0.93 | 1.01 (0.93-1.09)      | 0.81 | 0.98 (0.90-1.08) | 0.73                       | 0.68 |
| 6p25.3   | rs11242675 | 1318878   | A                | G                | 0.99 (0.93-1.04)      | 0.65                       | 0.90 (0.83-0.99) | 0.02                       | 0.12 | 1.04 (0.96-1.14)      | 0.33 | 0.94 (0.85-1.03) | 0.20                       | 0.13 |

|          |                 |           |   |   |                  |                            |                  |                            |      |                  |                            |                  |                            |      |
|----------|-----------------|-----------|---|---|------------------|----------------------------|------------------|----------------------------|------|------------------|----------------------------|------------------|----------------------------|------|
| 6p24.3   | rs9348512       | 10456706  | C | A | 1.00 (0.95-1.06) | 0.95                       | 0.98 (0.90-1.06) | 0.57                       | 0.63 | 0.84 (0.77-0.91) | <b>3.9x10<sup>-5</sup></b> | 0.87 (0.79-0.96) | <b>4.2x10<sup>-3</sup></b> | 0.58 |
| 6p23     | rs204247        | 13722523  | A | G | 1.00 (0.95-1.05) | 0.98                       | 1.00 (0.93-1.08) | 0.96                       | 0.95 | 1.05 (0.97-1.14) | 0.21                       | 1.14 (1.03-1.25) | <b>7.2x10<sup>-3</sup></b> | 0.27 |
| 6q14     | rs17530068      | 82193109  | A | G | 1.04 (0.98-1.11) | 0.18                       | 1.00 (0.91-1.10) | 1.00                       | 0.48 | 1.11 (1.01-1.22) | 0.03                       | 1.09 (0.98-1.22) | 0.11                       | 0.84 |
| 6q25.1   | rs3757318       | 151914113 | G | A | 1.13 (1.02-1.24) | 0.01                       | 1.35 (1.19-1.55) | <b>7.4x10<sup>-6</sup></b> | 0.04 | 1.10 (0.95-1.27) | 0.22                       | 1.22 (1.04-1.43) | 0.02                       | 0.37 |
| 6q25.1   | rs2046210       | 151948366 | G | A | 1.14 (1.08-1.21) | <b>1.4x10<sup>-6</sup></b> | 1.21 (1.11-1.31) | <b>6.4x10<sup>-6</sup></b> | 0.32 | 1.08 (0.99-1.17) | 0.09                       | 1.04 (0.94-1.15) | 0.42                       | 0.63 |
| 7q35     | rs720475        | 144074929 | G | A | 0.99 (0.93-1.05) | 0.75                       | 0.95 (0.87-1.05) | 0.33                       | 0.55 | 1.00 (0.91-1.10) | 0.99                       | 0.95 (0.86-1.06) | 0.38                       | 0.53 |
| 8p12     | rs9693444       | 29509616  | C | A | 1.00 (0.95-1.06) | 0.91                       | 1.01 (0.93-1.10) | 0.83                       | 0.92 | 0.97 (0.89-1.05) | 0.43                       | 1.01 (0.92-1.11) | 0.89                       | 0.55 |
| 8q21.11  | rs6472903       | 76230301  | A | C | 1.06 (0.99-1.13) | 0.12                       | 0.91 (0.81-1.01) | 0.09                       | 0.03 | 1.01 (0.90-1.12) | 0.89                       | 0.93 (0.81-1.06) | 0.27                       | 0.37 |
| 8q21.11  | rs2943559       | 76417937  | A | G | 1.04 (0.94-1.14) | 0.47                       | 1.10 (0.95-1.27) | 0.19                       | 0.52 | 1.13 (0.98-1.3)  | 0.10                       | 1.07 (0.91-1.26) | 0.41                       | 0.67 |
| 8q24.21  | rs11780156      | 129194641 | G | A | 0.97 (0.91-1.04) | 0.40                       | 0.90 (0.81-1.00) | 0.05                       | 0.26 | 1.02 (0.93-1.13) | 0.63                       | 0.90 (0.80-1.02) | 0.10                       | 0.14 |
| 8q24.21  | rs13281615      | 128355618 | A | G | 1.03 (0.98-1.09) | 0.22                       | 0.98 (0.90-1.06) | 0.59                       | 0.28 | 1.05 (0.97-1.14) | 0.24                       | 1.03 (0.93-1.13) | 0.58                       | 0.73 |
| 9p21.3   | rs1011970       | 22062134  | C | A | 1.06 (0.98-1.14) | 0.13                       | 0.95 (0.85-1.06) | 0.35                       | 0.13 | 1.00 (0.90-1.12) | 0.99                       | 1.05 (0.93-1.19) | 0.44                       | 0.59 |
| 9q31.2   | rs10759243      | 110306115 | C | A | 0.98 (0.93-1.04) | 0.48                       | 0.99 (0.91-1.08) | 0.86                       | 0.82 | 1.03 (0.94-1.13) | 0.52                       | 0.96 (0.86-1.07) | 0.48                       | 0.37 |
| 9q31.2   | rs865686        | 110888478 | A | C | 0.98 (0.92-1.03) | 0.42                       | 1.03 (0.94-1.12) | 0.54                       | 0.37 | 1.00 (0.92-1.09) | 1.00                       | 0.97 (0.88-1.08) | 0.60                       | 0.71 |
| 10p12.31 | rs7072776       | 22032942  | G | A | 0.97 (0.92-1.03) | 0.35                       | 1.02 (0.94-1.11) | 0.65                       | 0.4  | 1.03 (0.95-1.13) | 0.48                       | 0.95 (0.86-1.05) | 0.36                       | 0.26 |
| 10p12.31 | rs11814448      | 22315843  | A | C |                  |                            |                  |                            |      |                  |                            |                  |                            |      |
| 10q21.2  | rs10995190      | 64278682  | G | A | 1.03 (0.96-1.11) | 0.41                       | 0.90 (0.80-1.01) | 0.08                       | 0.07 | 0.95 (0.85-1.08) | 0.45                       | 0.94 (0.82-1.07) | 0.34                       | 0.84 |
| 10q22.3  | rs704010        | 80841148  | G | A | 1.00 (0.95-1.06) | 0.92                       | 1.04 (0.96-1.14) | 0.29                       | 0.43 | 1.02 (0.94-1.10) | 0.64                       | 0.98 (0.89-1.07) | 0.63                       | 0.51 |
| 10q25.2  | rs7904519       | 114773927 | A | G | 1.12 (1.06-1.18) | <b>1.4x10<sup>-5</sup></b> | 1.05 (0.97-1.13) | 0.24                       | 0.18 | 1.03 (0.95-1.12) | 0.5                        | 1.01 (0.92-1.10) | 0.86                       | 0.76 |
| 10q26.12 | rs2981579       | 123337335 | G | A | 0.97 (0.92-1.02) | 0.27                       | 1.05 (0.97-1.14) | 0.23                       | 0.13 | 1.20 (1.10-1.30) | <b>2.2x10<sup>-5</sup></b> | 1.29 (1.18-1.42) | <b>3.8x10<sup>-8</sup></b> | 0.21 |
| 10q26.12 | rs11199914      | 123093901 | G | A | 1.00 (0.94-1.05) | 0.87                       | 1.09 (1.00-1.18) | 0.06                       | 0.12 | 0.98 (0.90-1.07) | 0.63                       | 0.92 (0.84-1.02) | 0.12                       | 0.41 |
| 11p15.5  | rs3817198       | 1909006   | A | G | 1.08 (1.02-1.14) | <b>7.0x10<sup>-3</sup></b> | 1.07 (0.99-1.17) | 0.10                       | 0.9  | 1.11 (1.01-1.21) | 0.02                       | 1.12 (1.02-1.24) | 0.02                       | 0.84 |
| 11q13.1  | rs3903072       | 65583066  | C | A | 0.99 (0.94-1.04) | 0.72                       | 1.00 (0.92-1.08) | 0.93                       | 0.9  | 0.96 (0.88-1.04) | 0.31                       | 1.02 (0.92-1.12) | 0.75                       | 0.38 |
| 11q13.3  | rs554219        | 69331642  | C | G | 1.02 (0.94-1.1)  | 0.70                       | 1.06 (0.94-1.20) | 0.31                       | 0.55 | 1.01 (0.89-1.14) | 0.88                       | 1.20 (1.06-1.37) | <b>5.1x10<sup>-3</sup></b> | 0.06 |
| 11q13.3  | c11_pos69088342 | 69379161  | C | A | 1.06 (0.95-1.19) | 0.33                       | 0.99 (0.83-1.18) | 0.89                       | 0.54 | 0.96 (0.80-1.15) | 0.62                       | 1.23 (1.03-1.48) | 0.02                       | 0.06 |
| 11q13.3  | rs494406        | 69344241  | G | A | 1.02 (0.96-1.08) | 0.62                       | 1.03 (0.94-1.12) | 0.56                       | 0.84 | 1.03 (0.94-1.13) | 0.54                       | 1.08 (0.98-1.19) | 0.14                       | 0.51 |
| 11q24.3  | rs11820646      | 129461171 | G | A | 0.94 (0.89-1.00) | 0.03                       | 0.9 (0.83-0.98)  | 0.01                       | 0.4  | 0.91 (0.83-0.99) | 0.02                       | 0.92 (0.84-1.01) | 0.10                       | 0.81 |
| 12p13.1  | rs12422552      | 14413931  | G | C | 0.99 (0.93-1.05) | 0.66                       | 1.07 (0.97-1.17) | 0.16                       | 0.19 | 1.02 (0.93-1.12) | 0.62                       | 0.96 (0.86-1.07) | 0.45                       | 0.40 |
| 12p11.22 | rs10771399      | 28155080  | A | G | 0.83 (0.76-0.91) | <b>4.1x10<sup>-5</sup></b> | 0.89 (0.78-1.01) | 0.07                       | 0.43 | 0.95 (0.83-1.08) | 0.44                       | 0.81 (0.68-0.96) | 0.01                       | 0.16 |

|           |            |           |   |   |                  |                            |                  |                            |                            |                  |                            |                  |                            |      |
|-----------|------------|-----------|---|---|------------------|----------------------------|------------------|----------------------------|----------------------------|------------------|----------------------------|------------------|----------------------------|------|
| 12q22     | rs17356907 | 96027759  | A | G | 0.96 (0.90-1.01) | 0.13                       | 0.94 (0.86-1.03) | 0.17                       | 0.75                       | 0.92 (0.85-1.01) | 0.08                       | 1.09 (0.99-1.20) | 0.10                       | 0.02 |
| 12q24.21  | rs1292011  | 115836522 | A | G | 1.00 (0.95-1.06) | 0.93                       | 1.00 (0.92-1.09) | 0.98                       | 0.98                       | 0.91 (0.84-0.99) | 0.03                       | 0.92 (0.84-1.01) | 0.09                       | 0.91 |
| 13q13.1   | rs11571833 | 32972626  | T | A |                  |                            |                  |                            |                            |                  |                            |                  |                            |      |
| 14q13.3   | rs2236007  | 37132769  | G | A | 0.97 (0.91-1.03) | 0.30                       | 0.97 (0.88-1.07) | 0.50                       | 0.99                       | 1.02 (0.93-1.13) | 0.67                       | 0.97 (0.86-1.09) | 0.62                       | 0.53 |
| 14q24.1   | rs2588809  | 68660428  | G | A | 0.95 (0.89-1.01) | 0.11                       | 0.98 (0.88-1.09) | 0.70                       | 0.6                        | 1.06 (0.96-1.18) | 0.25                       | 0.94 (0.83-1.06) | 0.33                       | 0.16 |
| 14q24.1   | rs999737   | 69034682  | G | A | 0.97 (0.91-1.03) | 0.33                       | 0.94 (0.85-1.04) | 0.22                       | 0.64                       | 0.97 (0.88-1.07) | 0.58                       | 0.96 (0.86-1.07) | 0.45                       | 0.84 |
| 14q32.11  | rs941764   | 91841069  | A | G | 1.02 (0.96-1.08) | 0.55                       | 1.04 (0.95-1.13) | 0.40                       | 0.72                       | 1.01 (0.93-1.09) | 0.89                       | 1.06 (0.96-1.16) | 0.23                       | 0.42 |
| 16q12.1_1 | rs3803662  | 52586341  | G | A | 1.00 (0.95-1.06) | 0.90                       | 1.18 (1.08-1.28) | <b>2.3x10<sup>-4</sup></b> | <b>4.7x10<sup>-3</sup></b> | 1.20 (1.10-1.31) | <b>3.1x10<sup>-5</sup></b> | 1.27 (1.15-1.41) | <b>1.7x10<sup>-6</sup></b> | 0.41 |
| 16q12.1_2 | rs11075995 | 53855291  | A | T | 1.00 (0.94-1.06) | 0.88                       | 1.04 (0.95-1.15) | 0.36                       | 0.42                       | 1.06 (0.96-1.17) | 0.23                       | 0.97 (0.87-1.09) | 0.63                       | 0.26 |
| 16q12.1_2 | rs17817449 | 53813367  | A | C | 0.93 (0.88-0.98) | <b>7.0x10<sup>-3</sup></b> | 0.99 (0.91-1.07) | 0.83                       | 0.23                       | 0.92 (0.85-1.00) | 0.06                       | 0.97 (0.88-1.06) | 0.48                       | 0.51 |
| 16q23.2   | rs13329835 | 80650805  | A | G | 1.06 (0.99-1.12) | 0.08                       | 1.03 (0.93-1.13) | 0.59                       | 0.63                       | 1.04 (0.94-1.14) | 0.46                       | 1.03 (0.93-1.15) | 0.58                       | 0.94 |
| 17q22     | rs6504950  | 53056471  | G | A | 1.02 (0.96-1.08) | 0.60                       | 0.93 (0.85-1.02) | 0.12                       | 0.13                       | 1.08 (0.99-1.18) | 0.08                       | 0.99 (0.89-1.10) | 0.85                       | 0.20 |
| 18q11.2   | rs527616   | 24337424  | C | G | 1.02 (0.97-1.08) | 0.38                       | 0.92 (0.84-1.00) | 0.04                       | 0.04                       | 0.93 (0.85-1.01) | 0.07                       | 1.02 (0.92-1.12) | 0.75                       | 0.16 |
| 18q11.2   | rs1436904  | 22824665  | A | C | 0.97 (0.92-1.02) | 0.24                       | 1.03 (0.95-1.12) | 0.42                       | 0.21                       | 0.97 (0.90-1.06) | 0.53                       | 0.93 (0.84-1.02) | 0.13                       | 0.47 |
| 19p13.11  | rs8170     | 17389704  | G | A | 1.19 (1.11-1.27) | <b>4.6x10<sup>-7</sup></b> | 1.18 (1.07-1.31) | <b>8.7x10<sup>-4</sup></b> | 0.95                       | 0.99 (0.89-1.10) | 0.80                       | 0.95 (0.84-1.07) | 0.39                       | 0.65 |
| 19p13.11  | rs4808801  | 18571141  | A | G | 0.99 (0.93-1.04) | 0.65                       | 0.97 (0.89-1.05) | 0.41                       | 0.68                       | 0.96 (0.88-1.04) | 0.33                       | 0.99 (0.90-1.09) | 0.82                       | 0.64 |
| 19q13.31  | rs3760982  | 44286513  | G | A | 1.04 (0.99-1.10) | 0.11                       | 1.02 (0.94-1.10) | 0.69                       | 0.63                       | 1.04 (0.96-1.13) | 0.31                       | 1.06 (0.97-1.16) | 0.20                       | 0.79 |
| 21q21.1   | rs2823093  | 16520832  | G | A | 0.96 (0.90-1.02) | 0.15                       | 0.94 (0.86-1.03) | 0.17                       | 0.74                       | 0.94 (0.86-1.04) | 0.23                       | 0.93 (0.84-1.04) | 0.21                       | 0.88 |
| 22q12.2   | rs132390   | 29621477  | A | G | 0.95 (0.82-1.10) | 0.49                       | 1.06 (0.86-1.31) | 0.58                       | 0.42                       | 1.13 (0.90-1.41) | 0.29                       | 1.26 (0.98-1.62) | 0.07                       | 0.53 |
| 22q13.1   | rs6001930  | 40876234  | A | G | 1.06 (0.97-1.15) | 0.19                       | 1.09 (0.96-1.25) | 0.18                       | 0.70                       | 0.96 (0.84-1.10) | 0.56                       | 1.08 (0.92-1.26) | 0.35                       | 0.30 |

# Reference and effect allele

## Figure legends

**Figure S1.** QQ plots for SNP associations with ER-positive and ER-negative disease in *BRCA1* mutation carriers. The inflation coefficient was computed using SNP subsets that had been chosen for inclusion on the genotyping array independent of their associations in CIMBA *BRCA1* mutation carriers

**Figure S2.** QQ plots for SNP associations with ER-positive and ER-negative disease in *BRCA2* mutation carriers. The inflation coefficient was computed using SNP subsets that had been chosen for inclusion on the genotyping array independent of their associations in CIMBA *BRCA2* mutation carriers

**Figure S3.** Log HR/OR estimates for the association of previously reported breast cancer susceptibility SNPs with breast cancer in A. BCAC and *BRCA1* carriers, B. in BCAC and *BRCA2* carriers, C. in *BRCA1* and *BRCA2* carriers

**Figure S4.** Log HR estimates for the association of previously reported breast cancer susceptibility SNPs with ER-positive and ER-negative breast cancer in *BRCA1* and *BRCA2* mutation carriers

**Figure S5.** Log HR/OR estimates for the association of previously reported breast cancer susceptibility SNPs with ER-positive and ER-negative breast cancer breast cancer in BCAC and in *BRCA1* mutation carriers

**Figure S6.** Log HR/OR estimates for the association of previously reported breast cancer susceptibility SNPs with ER-positive and ER-negative breast cancer in BCAC and *BRCA2* mutation carriers

**Figure S1**

All SNPs

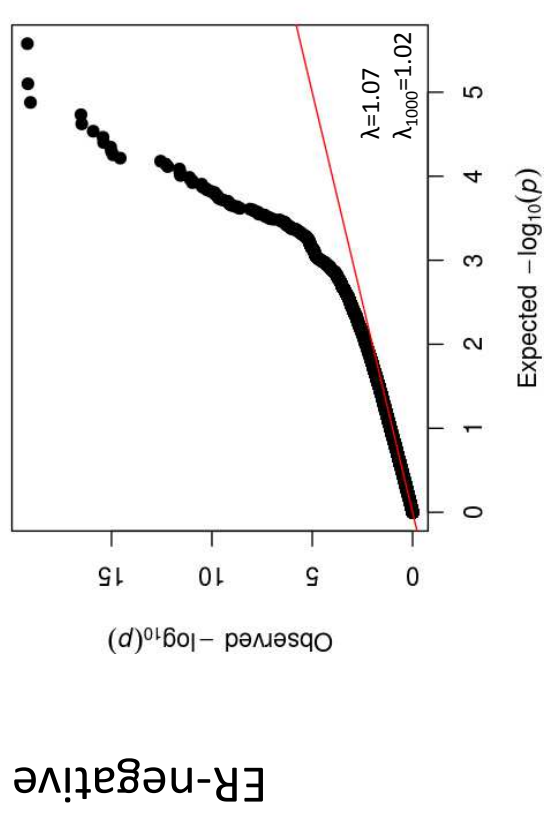

After excluding SNPs located in known BC susceptibility loci

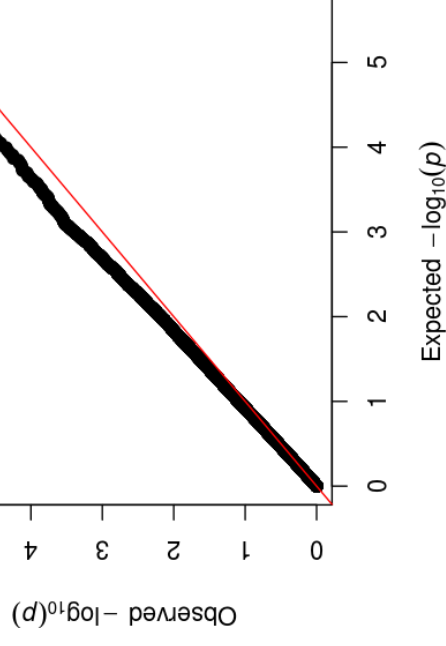

ER-positive

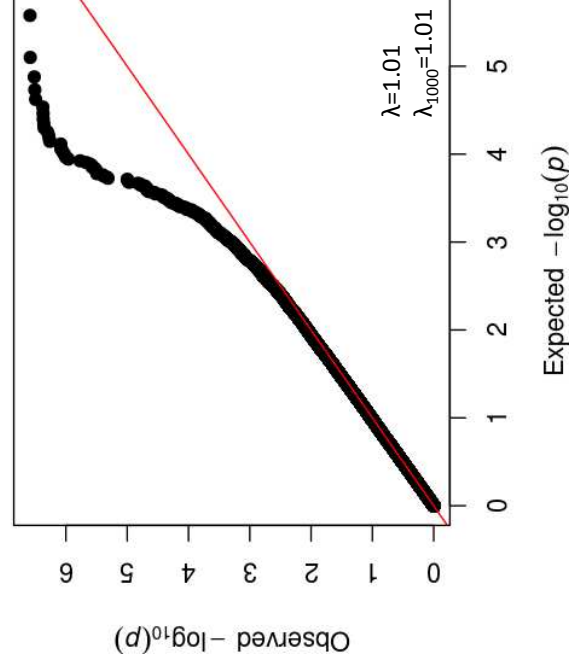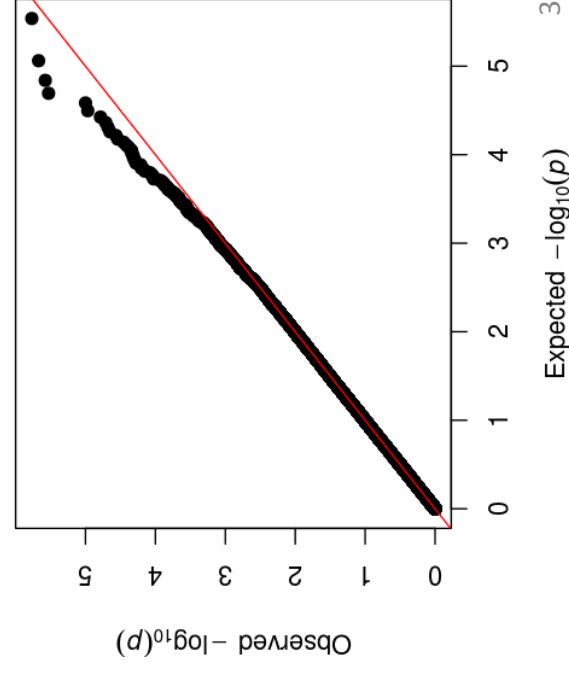

**Figure S2**

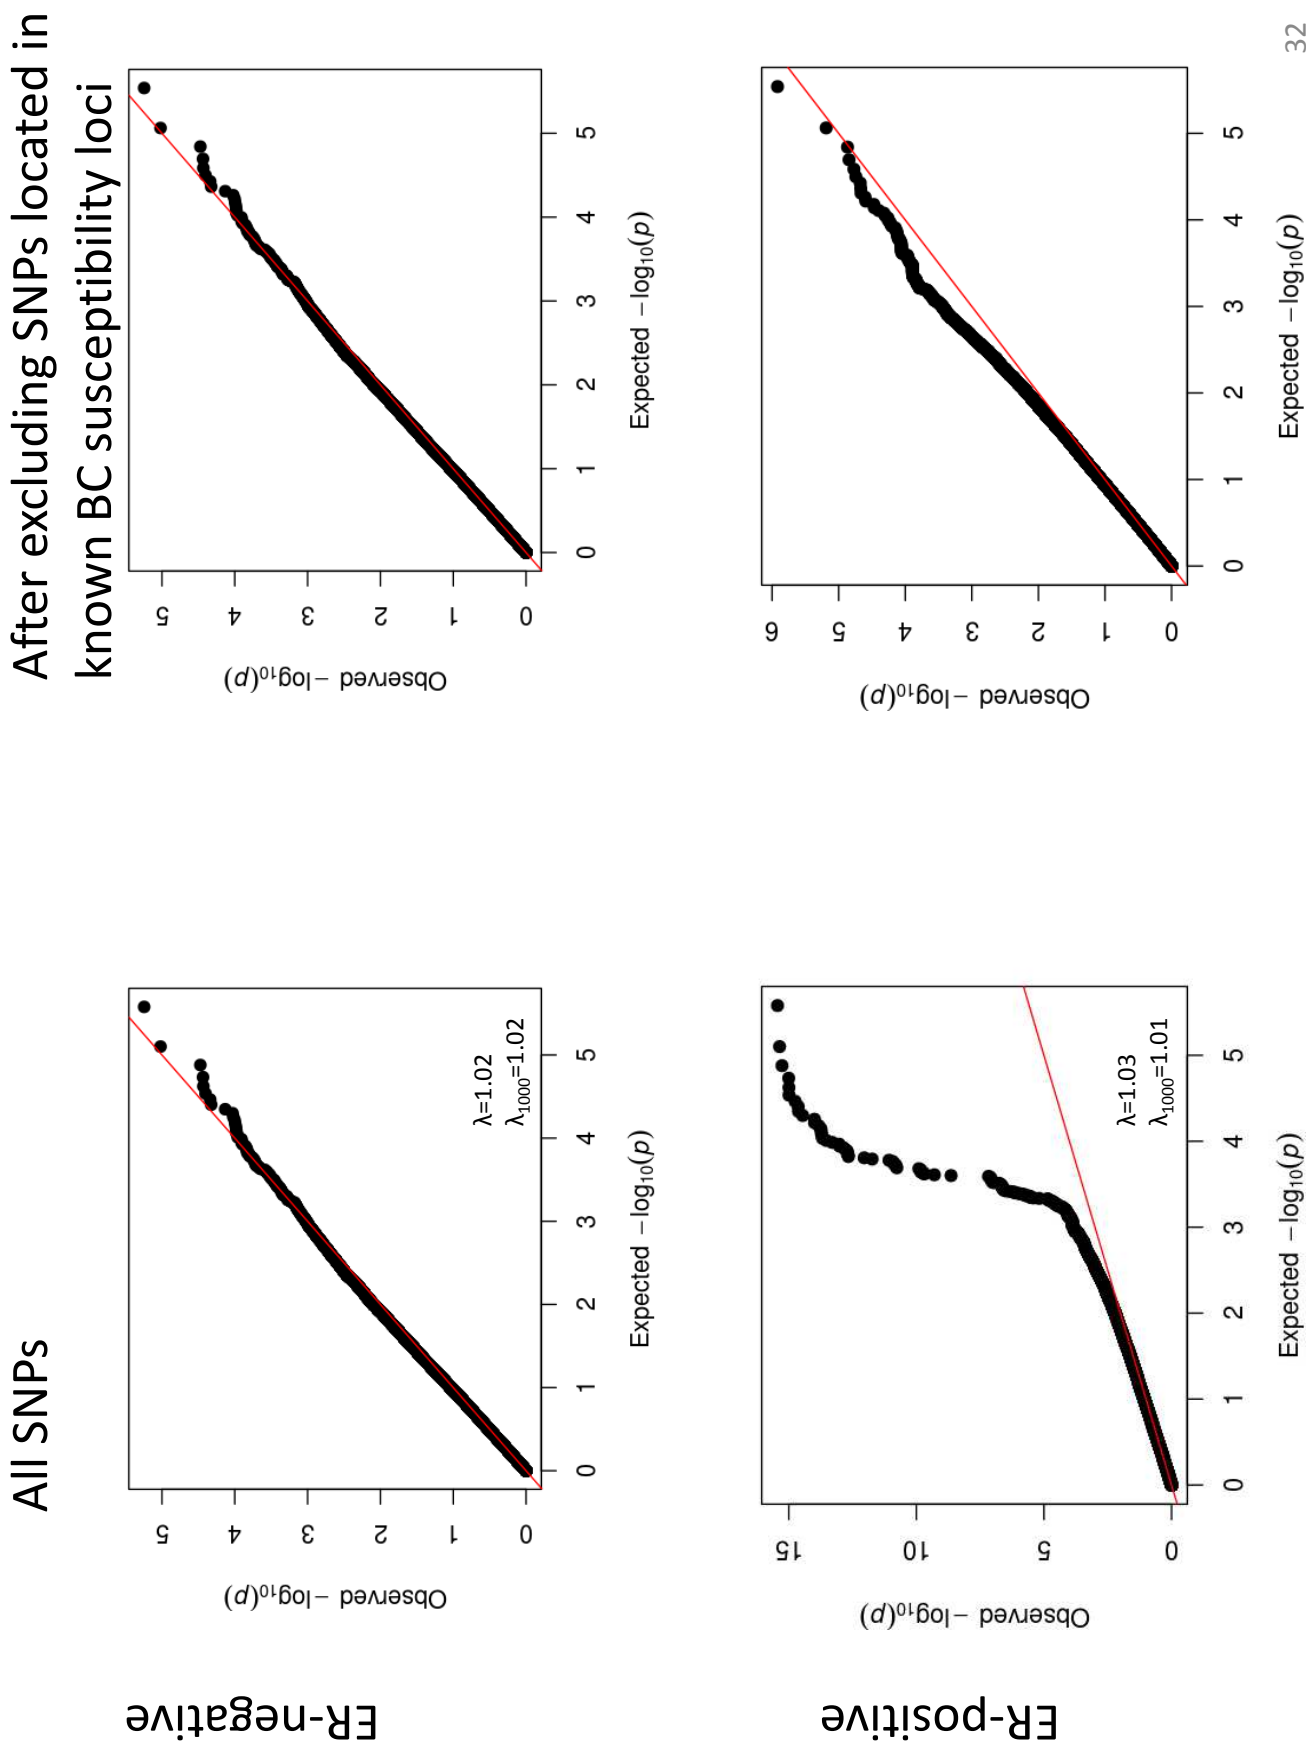



Figure S3

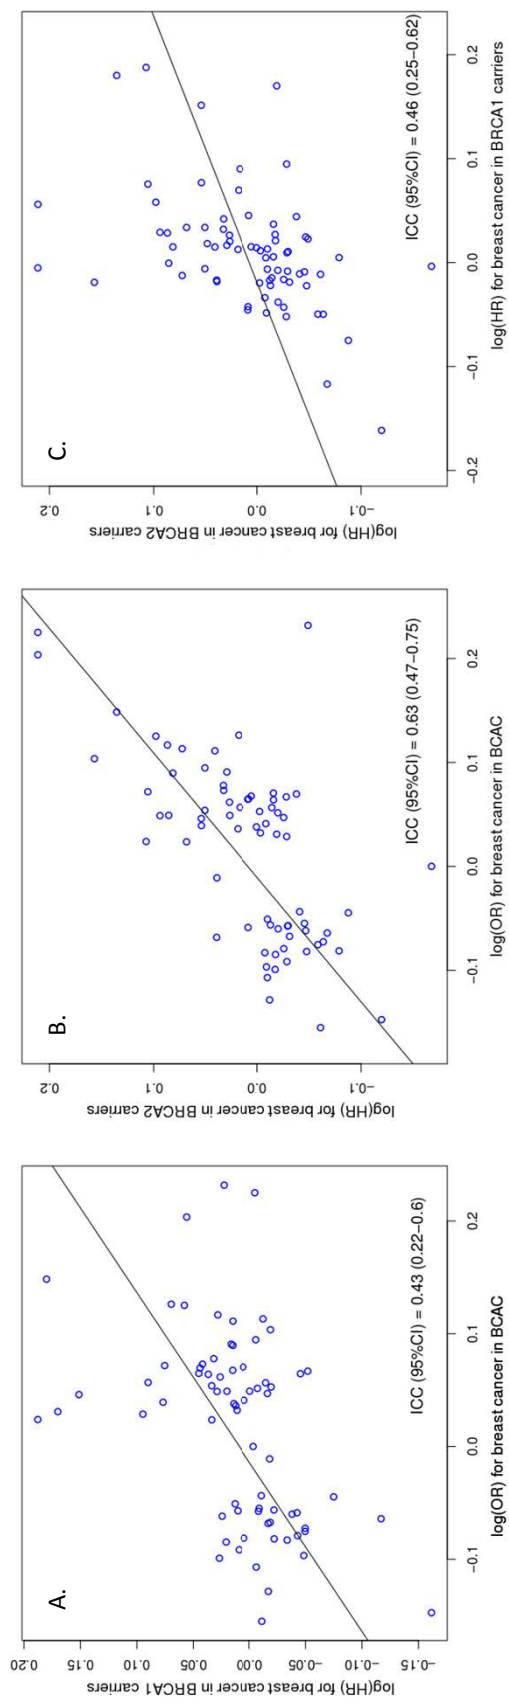

**Figure S4**

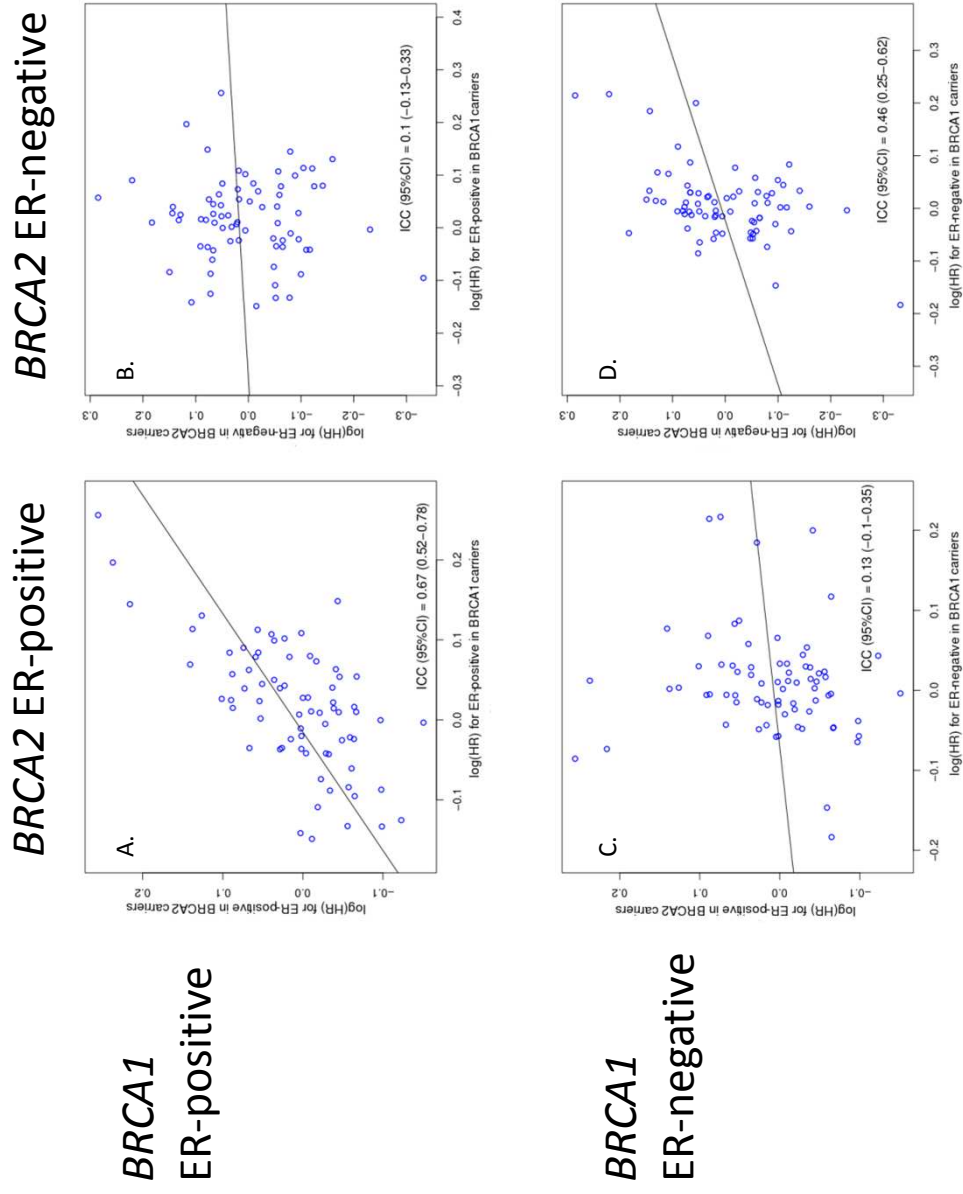

**Figure S5**

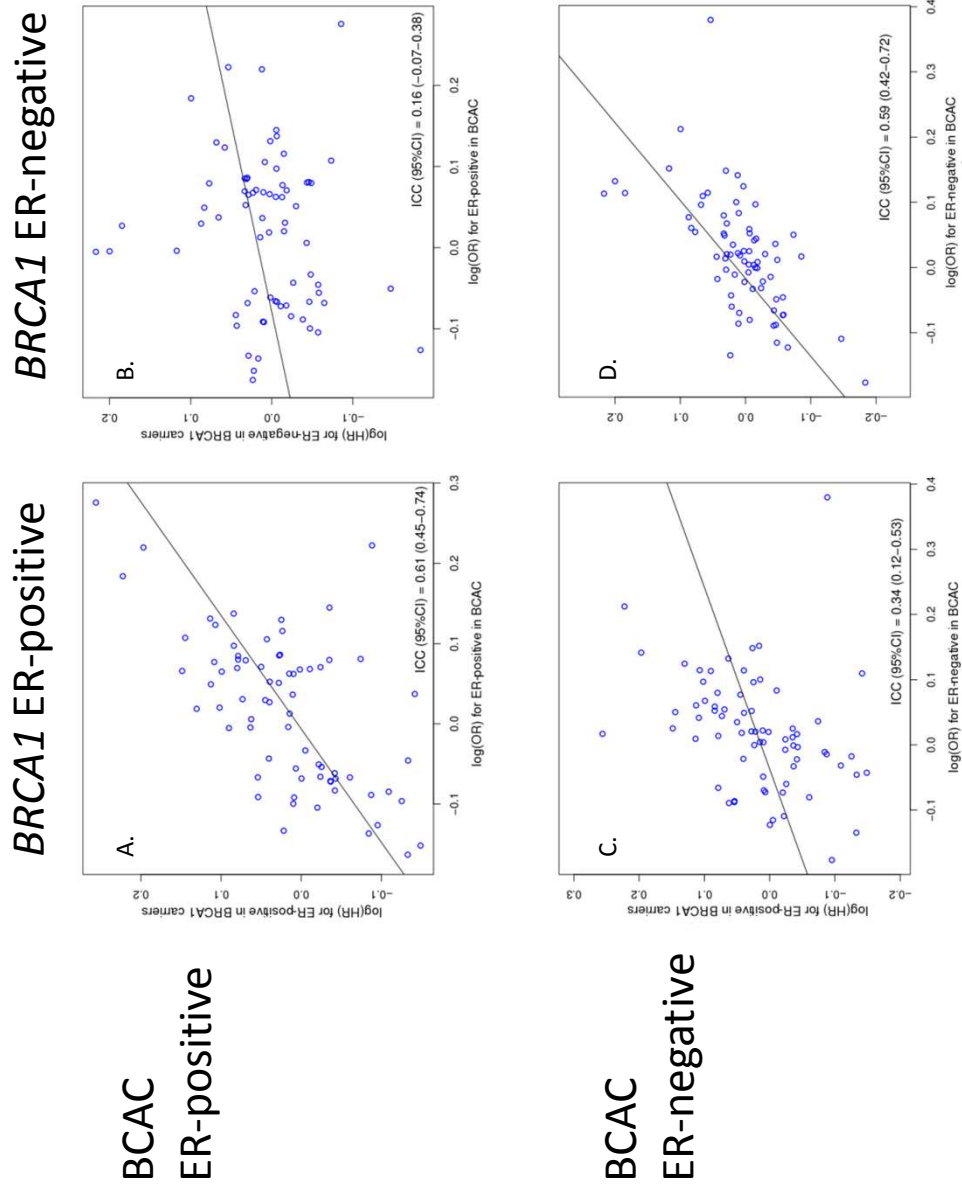

**Figure S6**

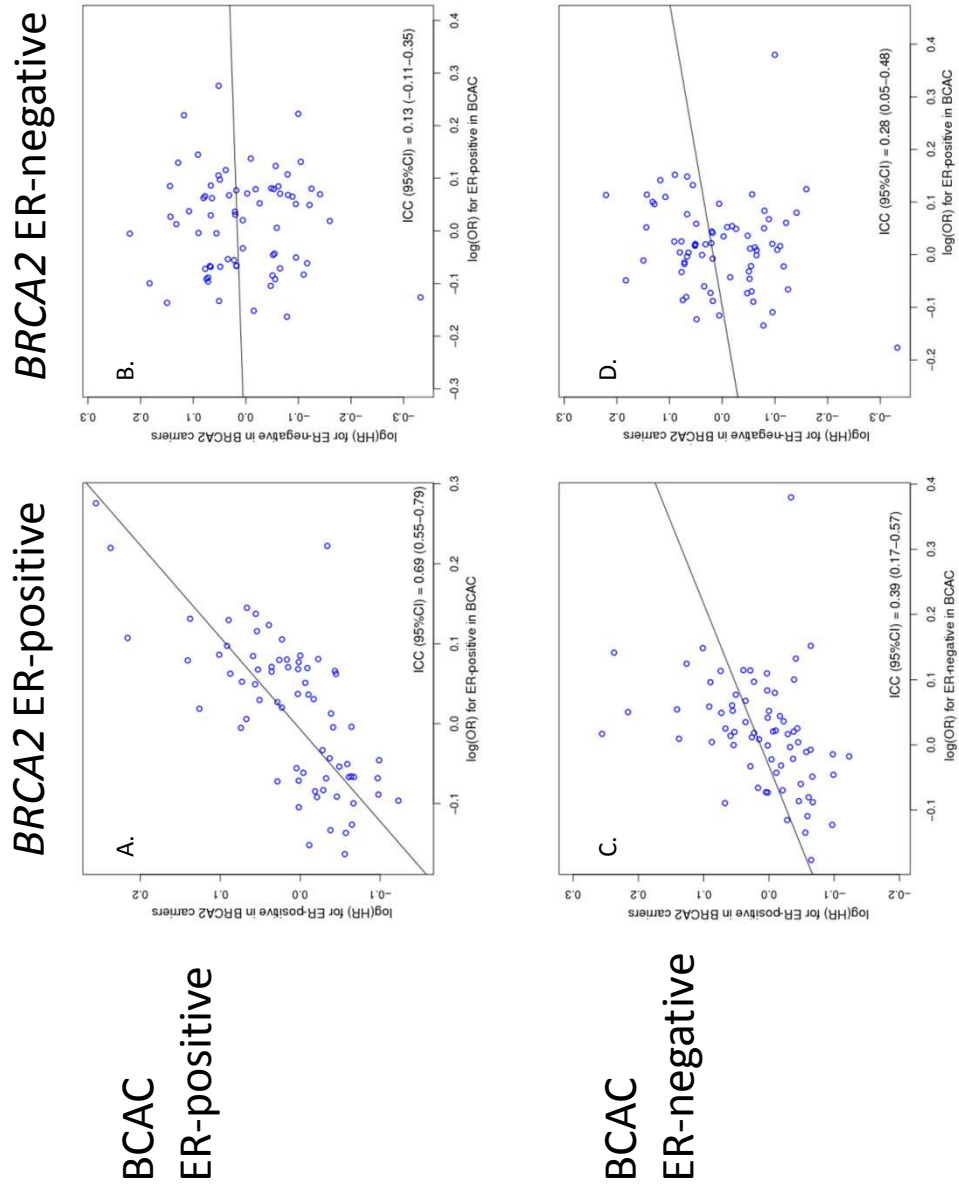

Supplement: 13058_2014_492_MOESM1_ESM.pdf [file 13058_2014_492_MOESM1_ESM.pdf]
